# Supplementary material for: SUMOylation of Dorsal attenuates Toll/NF-κB signaling
Source: Genetics. 2022 May 14;221(3):iyac081. doi: 10.1093/genetics/iyac081 (PMC9252280; doi:10.1093/genetics/iyac081)
Supplement: iyac081_Supplemental_Material_Table_1 [file iyac081_supplemental_material_table_1.xlsx]

## Sheet: Key
		ST-1: Differentially expressed genes in the 0-2 hour embryo across all four genotypes studied, dlWT, dlSCR, dlWT/Df, dlSCR/Df.
Tab	Genotype compared	Analysis
A	dl WT vs dl SCR	Differential expression analysis between dlWT and dlSCR
B	dl WT vs dl WT_Df	Differential expression analysis between dlWT and dlWT/Df
C	dl SCR vs dl SCR_Df	Differential expression analysis between dlSCR and dlSCR/Df
D	dl WT_Df vs dl SCR_Df	Differential expression analysis between dlWT/Df and dlSCR/Df
E	All DE logCPM	log(Counts per million) values for all the differentially expressed genes across the four genotypes, in duplicates

## Sheet: A. dl WT vs dl SCR
Gene	log2FoldChange	adjusted p-value
FBgn0051813	-2.09932	2.62e-17
FBgn0030186	-2.03324	3.38e-16
FBgn0027527	-1.94795	4.22e-14
FBgn0039434	-1.60557	1.51e-09
FBgn0037414	-1.58681	7.6e-09
FBgn0033810	-1.47531	4.55e-08
FBgn0020638	-1.47267	4.75e-08
FBgn0033721	-1.5094	4.87e-08
FBgn0035208	-1.4753	1.66e-07
FBgn0052364	1.37264	8.44e-07
FBgn0039444	-1.319	2.47e-06
FBgn0267795	-1.15997	3.57e-06
FBgn0053977	-1.13578	1.15e-05
FBgn0036465	1.18577	1.84e-05
FBgn0033275	-1.25133	2.66e-05
FBgn0013705	-1.13786	3.23e-05
FBgn0013704	-1.09695	5.33e-05
FBgn0263847	-1.19239	6.16e-05
FBgn0035735	-1.14196	6.91e-05
FBgn0037424	-1.15408	0.000208561
FBgn0035077	-1.14663	0.0002454
FBgn0033740	1.11198	0.000633128
FBgn0036872	-1.05366	0.00143312
FBgn0036545	-1.00332	0.00177924
FBgn0034204	-0.918308	0.00517456
FBgn0028855	-0.991503	0.00633414
FBgn0004777	-0.868282	0.00719713
FBgn0040279	-0.891162	0.00719713
FBgn0051626	-0.851709	0.00811406
FBgn0086027	-0.952271	0.00811406
FBgn0010431	0.85139	0.0112978
FBgn0040842	-0.796422	0.0112978
FBgn0041717	-0.948715	0.0112978
FBgn0052214	-0.858967	0.0112978
FBgn0058469	-0.830563	0.0112978
FBgn0035547	-0.901003	0.012059
FBgn0035541	-0.730923	0.0201536
FBgn0083987	-0.893487	0.0202731
FBgn0001085	0.855868	0.0205337
FBgn0015805	0.792822	0.0205337
FBgn0036199	0.866569	0.0205337
FBgn0038017	-0.856437	0.0205337
FBgn0052243	0.834503	0.021107
FBgn0037617	-0.872844	0.0264327
FBgn0262813	0.823844	0.0266582
FBgn0010228	0.820809	0.0268023
FBgn0031097	-0.816023	0.0299522
FBgn0000228	0.732226	0.0306375
FBgn0003274	-0.668265	0.0306375
FBgn0003277	0.710411	0.0306375
FBgn0029114	0.821296	0.0306375
FBgn0035621	-0.839852	0.0306375
FBgn0036594	-0.715417	0.030866
FBgn0027499	0.730692	0.035052
FBgn0027843	0.790537	0.0352324
FBgn0037913	-0.598984	0.0412712
FBgn0062928	-0.73163	0.0412712
FBgn0031629	-0.830091	0.0414365
FBgn0011761	-0.599792	0.0501854
FBgn0039286	0.810296	0.0501854
FBgn0040798	-0.657211	0.0501854
FBgn0050457	-0.6765	0.0501854
FBgn0265082	0.825924	0.0550687
FBgn0037430	-0.705948	0.0556023
FBgn0001256	-0.706985	0.0655009
FBgn0004389	0.778563	0.0766919
FBgn0033021	0.736329	0.0766919
FBgn0033942	-0.764716	0.0766919
FBgn0035856	-0.620276	0.0766919
FBgn0263979	0.757807	0.0767614
FBgn0266582	-0.611957	0.0795206
FBgn0031759	0.636784	0.0859464
FBgn0036592	-0.640328	0.0859464
FBgn0004183	-0.785727	0.0882531
FBgn0039441	-0.61932	0.0933782
FBgn0014417	0.74096	0.0959592
FBgn0050085	0.772866	0.0959592
FBgn0035513	-0.668951	0.0983026
FBgn0284248	0.690847	0.0983026
FBgn0040809	-0.748777	0.11325
FBgn0039537	0.589701	0.115989
FBgn0033584	0.750068	0.124517
FBgn0040799	-0.571809	0.124517
FBgn0267826	-0.755507	0.126512
FBgn0053503	-0.569162	0.128009
FBgn0029681	-0.59111	0.141085
FBgn0037504	0.705294	0.164801
FBgn0051957	-0.674383	0.164888
FBgn0036605	-0.541438	0.175036
FBgn0037270	-0.542348	0.199755
FBgn0004179	0.591557	0.216118
FBgn0266101	0.618351	0.219413
FBgn0050413	-0.616998	0.221599
FBgn0037224	-0.656211	0.235169
FBgn0031453	0.517958	0.240519
FBgn0259139	0.583061	0.241957
FBgn0263018	-0.640468	0.247895
FBgn0003076	-0.556815	0.257217
FBgn0086904	-0.532352	0.257217
FBgn0266619	0.693161	0.257217
FBgn0001149	-0.553666	0.280092
FBgn0002780	0.584585	0.280092
FBgn0004052	0.683209	0.280092
FBgn0050458	-0.508455	0.280092
FBgn0004687	0.59695	0.280858
FBgn0010660	0.614819	0.287092
FBgn0000547	0.607891	0.288413
FBgn0014007	0.6608	0.291184
FBgn0031681	0.593956	0.296462
FBgn0086698	-0.637247	0.296462
FBgn0262104	-0.603475	0.296462
FBgn0026320	0.658737	0.312474
FBgn0010078	-0.52025	0.316197
FBgn0030390	-0.524558	0.318566
FBgn0038610	-0.567161	0.323821
FBgn0039170	-0.636587	0.340385
FBgn0259209	-0.592623	0.340385
FBgn0031052	0.604361	0.343182
FBgn0036600	-0.50893	0.345652
FBgn0038339	-0.460514	0.367635
FBgn0052266	-0.460514	0.367635
FBgn0010423	-0.655598	0.368776
FBgn0035859	-0.490745	0.368776
FBgn0036606	-0.45838	0.368776
FBgn0052205	-0.64105	0.368776
FBgn0052453	-0.45717	0.368776
FBgn0002773	-0.572075	0.39963
FBgn0052365	0.616	0.39963
FBgn0021776	0.64473	0.40053
FBgn0038487	-0.514432	0.40053
FBgn0015477	0.617096	0.408443
FBgn0001197	0.508009	0.41453
FBgn0039436	-0.456163	0.41453
FBgn0052207	-0.572576	0.439009
FBgn0263599	0.605314	0.439009
FBgn0000565	0.634066	0.44908
FBgn0014189	0.485873	0.471338
FBgn0033658	-0.444865	0.477632
FBgn0037580	0.618683	0.480619
FBgn0036038	0.625844	0.501217
FBgn0036607	-0.469628	0.505865
FBgn0001254	-0.581426	0.51484
FBgn0003930	-0.61225	0.525569
FBgn0001090	0.597646	0.527728
FBgn0004169	-0.599709	0.527728
FBgn0025641	0.548138	0.540821
FBgn0020618	-0.453616	0.553278
FBgn0022960	0.612993	0.553278
FBgn0027537	0.548331	0.553278
FBgn0037429	-0.429435	0.553278
FBgn0013701	-0.574474	0.554092
FBgn0015393	-0.528343	0.554092
FBgn0030328	0.482384	0.554092
FBgn0052016	0.598804	0.554092
FBgn0052412	-0.530559	0.554092
FBgn0085443	0.562183	0.554092
FBgn0039558	0.555678	0.55978
FBgn0020660	0.602115	0.572192
FBgn0035689	0.528374	0.572192
FBgn0003463	0.591042	0.573547
FBgn0011230	0.561718	0.573547
FBgn0086655	0.568391	0.573547
FBgn0035824	0.599777	0.580718
FBgn0031057	0.435117	0.582313
FBgn0036331	0.589711	0.589385
FBgn0004598	0.522267	0.606449
FBgn0035907	-0.513282	0.61141
FBgn0001215	0.439167	0.617934
FBgn0004781	-0.408279	0.617934
FBgn0032453	-0.48415	0.617934
FBgn0038476	0.479287	0.617934
FBgn0050449	-0.578199	0.657308
FBgn0000451	-0.554424	0.680273
FBgn0014427	-0.506196	0.683214
FBgn0036107	0.572196	0.683214
FBgn0003716	0.57399	0.687115
FBgn0032299	-0.39362	0.687115
FBgn0035858	-0.391563	0.687115
FBgn0037873	-0.459696	0.687115
FBgn0041721	-0.569322	0.687115
FBgn0250848	-0.507155	0.687115
FBgn0039302	0.45217	0.703548
FBgn0004187	-0.543905	0.704287
FBgn0010452	0.576103	0.704287
FBgn0013770	0.504173	0.704287
FBgn0261797	0.575614	0.704287
FBgn0036390	-0.369198	0.706402
FBgn0037356	-0.540795	0.706402
FBgn0003448	0.419943	0.70763
FBgn0037323	-0.385455	0.70763
FBgn0037416	-0.366839	0.70763
FBgn0037614	-0.572132	0.70763
FBgn0040890	-0.544163	0.70763
FBgn0051155	0.553417	0.70763
FBgn0262473	0.54258	0.71205
FBgn0034091	0.507917	0.718567
FBgn0027786	-0.48635	0.718694
FBgn0038972	-0.487343	0.718694
FBgn0013688	0.426476	0.725358
FBgn0027603	0.489949	0.725358
FBgn0035737	-0.416878	0.725358
FBgn0053193	-0.54667	0.725358
FBgn0023170	-0.422084	0.726162
FBgn0031632	0.563007	0.726162
FBgn0039204	0.566493	0.726162
FBgn0265274	0.521776	0.726162
FBgn0038316	0.564314	0.726651
FBgn0030099	-0.563015	0.732135
FBgn0035257	-0.558258	0.732135
FBgn0037428	-0.410584	0.732135
FBgn0037478	0.543702	0.732135
FBgn0037686	-0.405242	0.732135
FBgn0039665	-0.507438	0.732135
FBgn0259916	0.545271	0.732135
FBgn0266982	-0.401085	0.732135
FBgn0001253	-0.405189	0.741254
FBgn0000463	0.489492	0.741539
FBgn0020248	-0.517945	0.751592
FBgn0037583	0.540097	0.751592
FBgn0052570	-0.40004	0.751592
FBgn0261524	0.488141	0.751592
FBgn0036684	0.547429	0.771248
FBgn0036767	0.510301	0.771248
FBgn0039272	-0.517657	0.771248
FBgn0042174	-0.444354	0.771248
FBgn0030504	0.526255	0.779405
FBgn0020377	0.537556	0.784637
FBgn0030883	-0.465166	0.800216
FBgn0028744	0.520222	0.804712
FBgn0033367	-0.49203	0.804712
FBgn0020306	0.448262	0.814871
FBgn0032538	-0.392801	0.814871
FBgn0037443	0.531276	0.814871
FBgn0023509	0.541648	0.844506
FBgn0035582	-0.352768	0.844506
FBgn0037541	0.521764	0.844506
FBgn0040011	0.50941	0.844506
FBgn0051075	-0.541179	0.844506
FBgn0038277	-0.462795	0.846861
FBgn0038647	-0.478019	0.847507
FBgn0003567	0.516127	0.856086
FBgn0038772	-0.486797	0.859055
FBgn0015229	0.4451	0.86368
FBgn0003575	0.491149	0.866048
FBgn0036352	-0.447455	0.866048
FBgn0039754	-0.421455	0.866048
FBgn0039186	0.465232	0.867016
FBgn0001226	-0.410669	0.873181
FBgn0259685	0.513156	0.876428
FBgn0004404	-0.390495	0.892063
FBgn0016700	0.403098	0.892063
FBgn0030174	0.528759	0.892063
FBgn0030980	-0.323203	0.892063
FBgn0032020	-0.491257	0.892063
FBgn0036470	-0.342054	0.892063
FBgn0036870	-0.322048	0.892063
FBgn0039337	-0.499589	0.892063
FBgn0260955	-0.340011	0.892063
FBgn0037369	0.513513	0.893026
FBgn0050373	-0.480874	0.893026
FBgn0030447	-0.458502	0.901751
FBgn0036601	-0.318751	0.901751
FBgn0083968	-0.427605	0.901751
FBgn0027785	-0.4291	0.902203
FBgn0003391	0.455014	0.907116
FBgn0036351	-0.337184	0.907116
FBgn0026361	0.50707	0.908783
FBgn0031908	-0.522082	0.908783
FBgn0046875	-0.367875	0.908783
FBgn0263911	-0.389186	0.908783
FBgn0015582	-0.474504	0.91047
FBgn0036624	0.521293	0.91047
FBgn0085451	0.483247	0.91047
FBgn0259212	0.442112	0.922506
FBgn0250816	0.505094	0.922607
FBgn0035528	-0.44766	0.924098
FBgn0039111	-0.510663	0.924098
FBgn0030093	0.412409	0.937726
FBgn0030932	-0.409263	0.937726
FBgn0036112	-0.308458	0.937726
FBgn0051156	0.467283	0.937726
FBgn0259985	0.509978	0.937726
FBgn0262169	0.458709	0.937726
FBgn0264695	-0.503717	0.937726
FBgn0036213	-0.390763	0.942313
FBgn0015521	-0.378307	0.946343
FBgn0043854	0.461011	0.954511
FBgn0032084	-0.357655	0.957773
FBgn0033715	0.467532	0.963129
FBgn0004378	0.435588	0.970023
FBgn0005624	0.463922	0.970023
FBgn0011785	0.457008	0.970023
FBgn0034223	0.505963	0.970023
FBgn0042085	0.451863	0.970023
FBgn0250754	0.484395	0.979127
FBgn0011723	0.468693	0.996092
FBgn0029840	-0.470981	0.996092
FBgn0037383	-0.489932	0.996852
FBgn0000008	0.300549	0.999887
FBgn0000014	0.0254425	0.999887
FBgn0000015	0.109281	0.999887
FBgn0000017	0.406674	0.999887
FBgn0000018	0.128759	0.999887
FBgn0000022	0.128727	0.999887
FBgn0000024	-0.0502041	0.999887
FBgn0000028	0.064537	0.999887
FBgn0000032	-0.103874	0.999887
FBgn0000036	-0.0462541	0.999887
FBgn0000037	0.0341522	0.999887
FBgn0000038	-0.132208	0.999887
FBgn0000042	-0.0363027	0.999887
FBgn0000043	0.120742	0.999887
FBgn0000044	-0.0867611	0.999887
FBgn0000045	-0.037717	0.999887
FBgn0000046	-0.199744	0.999887
FBgn0000047	0.155026	0.999887
FBgn0000052	0.0127612	0.999887
FBgn0000053	-0.0385492	0.999887
FBgn0000055	-0.0245223	0.999887
FBgn0000057	0.268122	0.999887
FBgn0000063	0.138103	0.999887
FBgn0000064	-0.0531803	0.999887
FBgn0000071	0.209089	0.999887
FBgn0000075	-0.212553	0.999887
FBgn0000077	0.190244	0.999887
FBgn0000078	-0.171247	0.999887
FBgn0000079	-0.108448	0.999887
FBgn0000083	0.213603	0.999887
FBgn0000084	-0.242396	0.999887
FBgn0000092	-0.0509877	0.999887
FBgn0000094	0.202734	0.999887
FBgn0000097	0.150085	0.999887
FBgn0000100	-0.24067	0.999887
FBgn0000108	-0.125711	0.999887
FBgn0000109	-0.0137073	0.999887
FBgn0000114	-0.0925976	0.999887
FBgn0000115	0.0123101	0.999887
FBgn0000116	0.14695	0.999887
FBgn0000117	0.183588	0.999887
FBgn0000119	0.187679	0.999887
FBgn0000120	-0.239795	0.999887
FBgn0000121	-0.241245	0.999887
FBgn0000137	0.0233274	0.999887
FBgn0000139	0.0868757	0.999887
FBgn0000140	0.329971	0.999887
FBgn0000146	0.347306	0.999887
FBgn0000147	0.111231	0.999887
FBgn0000150	-0.17763	0.999887
FBgn0000152	0.0667702	0.999887
FBgn0000153	-0.0197208	0.999887
FBgn0000158	0.20423	0.999887
FBgn0000163	-0.0634849	0.999887
FBgn0000166	-0.0339676	0.999887
FBgn0000173	0.0183125	0.999887
FBgn0000179	-0.0328697	0.999887
FBgn0000180	0.314132	0.999887
FBgn0000181	-0.212732	0.999887
FBgn0000183	0.087959	0.999887
FBgn0000206	-0.0122514	0.999887
FBgn0000212	0.173289	0.999887
FBgn0000216	0.234449	0.999887
FBgn0000221	-0.307421	0.999887
FBgn0000227	0.135156	0.999887
FBgn0000229	0.0151537	0.999887
FBgn0000233	0.16645	0.999887
FBgn0000239	0.123784	0.999887
FBgn0000241	-0.139065	0.999887
FBgn0000244	0.190807	0.999887
FBgn0000246	0.0749999	0.999887
FBgn0000247	0.0701698	0.999887
FBgn0000250	0.144536	0.999887
FBgn0000251	0.214065	0.999887
FBgn0000253	0.0609552	0.999887
FBgn0000256	-0.292162	0.999887
FBgn0000257	-0.040269	0.999887
FBgn0000259	-0.282729	0.999887
FBgn0000261	0.0793582	0.999887
FBgn0000273	0.0855769	0.999887
FBgn0000274	-0.076986	0.999887
FBgn0000276	0.150469	0.999887
FBgn0000277	-0.0268185	0.999887
FBgn0000278	0.0548714	0.999887
FBgn0000279	0.0572819	0.999887
FBgn0000283	0.203153	0.999887
FBgn0000286	0.0340539	0.999887
FBgn0000287	-0.0408636	0.999887
FBgn0000289	0.201347	0.999887
FBgn0000299	-0.460135	0.999887
FBgn0000303	0.115868	0.999887
FBgn0000307	0.207495	0.999887
FBgn0000308	0.0874613	0.999887
FBgn0000316	0.130883	0.999887
FBgn0000317	0.194846	0.999887
FBgn0000318	-0.188702	0.999887
FBgn0000319	0.131486	0.999887
FBgn0000320	-0.00825471	0.999887
FBgn0000326	0.165527	0.999887
FBgn0000330	0.0368604	0.999887
FBgn0000339	-0.118018	0.999887
FBgn0000346	0.0522108	0.999887
FBgn0000351	-0.377136	0.999887
FBgn0000352	-0.052447	0.999887
FBgn0000355	0.0291515	0.999887
FBgn0000356	-0.0247752	0.999887
FBgn0000357	-0.118564	0.999887
FBgn0000358	0.0263966	0.999887
FBgn0000359	0.0607783	0.999887
FBgn0000360	-0.0248909	0.999887
FBgn0000370	-0.0343923	0.999887
FBgn0000376	0.208941	0.999887
FBgn0000377	0.188339	0.999887
FBgn0000382	0.125522	0.999887
FBgn0000384	0.0709436	0.999887
FBgn0000394	-0.0158073	0.999887
FBgn0000395	0.00182152	0.999887
FBgn0000404	-0.0801178	0.999887
FBgn0000405	0.376054	0.999887
FBgn0000406	-0.0319404	0.999887
FBgn0000411	0.311922	0.999887
FBgn0000412	0.27777	0.999887
FBgn0000414	0.389741	0.999887
FBgn0000416	0.23769	0.999887
FBgn0000422	-0.0110729	0.999887
FBgn0000426	-0.160238	0.999887
FBgn0000442	0.131954	0.999887
FBgn0000447	-0.0363017	0.999887
FBgn0000448	-0.105667	0.999887
FBgn0000449	0.135271	0.999887
FBgn0000454	-0.243437	0.999887
FBgn0000455	-0.0285977	0.999887
FBgn0000459	0.159293	0.999887
FBgn0000464	0.189843	0.999887
FBgn0000473	0.000686207	0.999887
FBgn0000477	-0.0671622	0.999887
FBgn0000479	0.0562633	0.999887
FBgn0000482	0.0636922	0.999887
FBgn0000489	0.208935	0.999887
FBgn0000490	0.0597126	0.999887
FBgn0000492	-0.0855976	0.999887
FBgn0000499	-0.197024	0.999887
FBgn0000500	-0.034704	0.999887
FBgn0000504	-0.310982	0.999887
FBgn0000520	-0.245737	0.999887
FBgn0000524	0.252043	0.999887
FBgn0000527	-0.0958951	0.999887
FBgn0000533	-0.247212	0.999887
FBgn0000535	-0.0413567	0.999887
FBgn0000536	0.00259198	0.999887
FBgn0000541	0.216268	0.999887
FBgn0000542	0.167709	0.999887
FBgn0000543	-0.120646	0.999887
FBgn0000546	0.196574	0.999887
FBgn0000551	-0.066763	0.999887
FBgn0000557	-0.0620168	0.999887
FBgn0000559	0.25626	0.999887
FBgn0000562	0.188312	0.999887
FBgn0000566	0.0541126	0.999887
FBgn0000567	0.0520758	0.999887
FBgn0000568	-0.0215325	0.999887
FBgn0000575	0.106914	0.999887
FBgn0000576	0.188576	0.999887
FBgn0000577	0.0668062	0.999887
FBgn0000578	0.17476	0.999887
FBgn0000579	-0.0924986	0.999887
FBgn0000581	0.26325	0.999887
FBgn0000588	0.0787616	0.999887
FBgn0000591	0.0606139	0.999887
FBgn0000592	-0.0920919	0.999887
FBgn0000606	0.204305	0.999887
FBgn0000611	0.145297	0.999887
FBgn0000615	-0.0688157	0.999887
FBgn0000617	-0.178456	0.999887
FBgn0000618	-0.130193	0.999887
FBgn0000625	0.0437264	0.999887
FBgn0000629	-0.0061929	0.999887
FBgn0000633	-0.105314	0.999887
FBgn0000635	-0.0880296	0.999887
FBgn0000636	0.00556097	0.999887
FBgn0000639	0.0730827	0.999887
FBgn0000640	0.0530195	0.999887
FBgn0000644	-0.0389607	0.999887
FBgn0000658	0.0153131	0.999887
FBgn0000659	-0.00442597	0.999887
FBgn0000662	0.104755	0.999887
FBgn0000667	0.110358	0.999887
FBgn0000709	0.0512395	0.999887
FBgn0000711	0.167657	0.999887
FBgn0000719	0.0423547	0.999887
FBgn0000721	-0.0671671	0.999887
FBgn0000723	-0.161293	0.999887
FBgn0000808	0.0958036	0.999887
FBgn0000810	0.215276	0.999887
FBgn0000826	-0.253738	0.999887
FBgn0000927	-0.378104	0.999887
FBgn0000964	0.0707563	0.999887
FBgn0000996	0.261169	0.999887
FBgn0001075	-0.0501354	0.999887
FBgn0001077	0.347328	0.999887
FBgn0001078	0.0598472	0.999887
FBgn0001079	0.214523	0.999887
FBgn0001084	-0.0319015	0.999887
FBgn0001086	0.288758	0.999887
FBgn0001087	0.0378558	0.999887
FBgn0001089	-0.112041	0.999887
FBgn0001091	-0.308335	0.999887
FBgn0001092	-0.213223	0.999887
FBgn0001098	0.0518261	0.999887
FBgn0001099	0.106529	0.999887
FBgn0001104	0.119854	0.999887
FBgn0001105	-0.0173195	0.999887
FBgn0001108	0.17106	0.999887
FBgn0001112	-0.050316	0.999887
FBgn0001114	0.00630977	0.999887
FBgn0001120	0.0774263	0.999887
FBgn0001122	-0.0169194	0.999887
FBgn0001123	-0.106936	0.999887
FBgn0001124	0.0196658	0.999887
FBgn0001125	-0.25392	0.999887
FBgn0001128	0.0346219	0.999887
FBgn0001133	-0.00776583	0.999887
FBgn0001137	-0.0104501	0.999887
FBgn0001138	-0.0309491	0.999887
FBgn0001139	0.341849	0.999887
FBgn0001142	-0.108023	0.999887
FBgn0001145	-0.0246985	0.999887
FBgn0001148	0.111504	0.999887
FBgn0001150	0.383948	0.999887
FBgn0001168	-0.0917029	0.999887
FBgn0001169	0.378256	0.999887
FBgn0001174	0.171287	0.999887
FBgn0001179	0.138913	0.999887
FBgn0001180	0.185299	0.999887
FBgn0001185	-0.0647303	0.999887
FBgn0001186	0.159188	0.999887
FBgn0001187	-0.0497052	0.999887
FBgn0001189	-0.09982	0.999887
FBgn0001202	0.171696	0.999887
FBgn0001206	0.494399	0.999887
FBgn0001208	-0.105139	0.999887
FBgn0001216	-0.0653677	0.999887
FBgn0001217	-0.11472	0.999887
FBgn0001218	0.303649	0.999887
FBgn0001220	0.0475737	0.999887
FBgn0001222	-0.0417687	0.999887
FBgn0001224	-0.0771811	0.999887
FBgn0001225	-0.263379	0.999887
FBgn0001227	0.100211	0.999887
FBgn0001229	-0.0068566	0.999887
FBgn0001230	0.35634	0.999887
FBgn0001233	0.0484713	0.999887
FBgn0001234	0.0472367	0.999887
FBgn0001235	0.265418	0.999887
FBgn0001247	-0.24365	0.999887
FBgn0001248	-0.369854	0.999887
FBgn0001250	0.0470752	0.999887
FBgn0001255	0.0478698	0.999887
FBgn0001257	0.143142	0.999887
FBgn0001258	-0.0914534	0.999887
FBgn0001263	0.0303356	0.999887
FBgn0001276	0.207205	0.999887
FBgn0001280	-0.0461592	0.999887
FBgn0001281	0.0107383	0.999887
FBgn0001285	-0.147274	0.999887
FBgn0001291	-0.193301	0.999887
FBgn0001296	-0.0493862	0.999887
FBgn0001297	0.00902185	0.999887
FBgn0001301	0.17883	0.999887
FBgn0001308	0.189049	0.999887
FBgn0001311	-0.215427	0.999887
FBgn0001316	0.0755895	0.999887
FBgn0001319	0.0343632	0.999887
FBgn0001320	0.485093	0.999887
FBgn0001321	-0.132101	0.999887
FBgn0001323	0.0946729	0.999887
FBgn0001324	-0.00825057	0.999887
FBgn0001325	0.193021	0.999887
FBgn0001330	0.126806	0.999887
FBgn0001341	0.271799	0.999887
FBgn0001404	-0.00941349	0.999887
FBgn0001491	0.397393	0.999887
FBgn0001565	0.0498004	0.999887
FBgn0001612	0.227203	0.999887
FBgn0001624	0.106282	0.999887
FBgn0001941	-0.150019	0.999887
FBgn0001942	0.0215712	0.999887
FBgn0001961	-0.112256	0.999887
FBgn0001965	0.258406	0.999887
FBgn0001970	0.187589	0.999887
FBgn0001974	0.244123	0.999887
FBgn0001977	0.0967785	0.999887
FBgn0001978	0.0988388	0.999887
FBgn0001981	-0.0732666	0.999887
FBgn0001983	0.0851128	0.999887
FBgn0001986	0.261939	0.999887
FBgn0001987	0.113802	0.999887
FBgn0001989	-0.0936205	0.999887
FBgn0001990	0.148358	0.999887
FBgn0001991	-0.0337272	0.999887
FBgn0001994	0.123458	0.999887
FBgn0001995	-0.0941585	0.999887
FBgn0002021	-0.0816119	0.999887
FBgn0002022	0.140421	0.999887
FBgn0002023	-0.106536	0.999887
FBgn0002031	-0.286512	0.999887
FBgn0002036	-0.235993	0.999887
FBgn0002044	-0.055454	0.999887
FBgn0002069	-0.275525	0.999887
FBgn0002121	0.174116	0.999887
FBgn0002174	-0.237898	0.999887
FBgn0002183	0.229063	0.999887
FBgn0002283	-0.12595	0.999887
FBgn0002284	-0.205537	0.999887
FBgn0002306	-0.0660998	0.999887
FBgn0002354	-0.404687	0.999887
FBgn0002413	-0.042901	0.999887
FBgn0002431	0.444624	0.999887
FBgn0002441	0.326683	0.999887
FBgn0002466	0.196351	0.999887
FBgn0002521	0.0156658	0.999887
FBgn0002522	0.0341247	0.999887
FBgn0002524	0.0506974	0.999887
FBgn0002525	-0.00145237	0.999887
FBgn0002526	-0.113	0.999887
FBgn0002535	-0.09368	0.999887
FBgn0002542	0.163269	0.999887
FBgn0002543	0.0406321	0.999887
FBgn0002552	0.0514624	0.999887
FBgn0002561	0.0455673	0.999887
FBgn0002562	0.0288355	0.999887
FBgn0002563	-0.0750194	0.999887
FBgn0002564	0.0691533	0.999887
FBgn0002565	-0.0845527	0.999887
FBgn0002566	0.0416514	0.999887
FBgn0002567	-0.080386	0.999887
FBgn0002569	-0.11753	0.999887
FBgn0002570	-0.183575	0.999887
FBgn0002571	-0.145768	0.999887
FBgn0002573	0.0890258	0.999887
FBgn0002577	-0.0308045	0.999887
FBgn0002578	-0.113993	0.999887
FBgn0002579	-0.360512	0.999887
FBgn0002590	0.0410925	0.999887
FBgn0002592	0.0834462	0.999887
FBgn0002593	-0.294945	0.999887
FBgn0002607	-0.327248	0.999887
FBgn0002609	-0.0184048	0.999887
FBgn0002622	-0.0801955	0.999887
FBgn0002626	-0.148537	0.999887
FBgn0002629	0.359746	0.999887
FBgn0002631	0.283212	0.999887
FBgn0002633	0.162443	0.999887
FBgn0002638	0.230519	0.999887
FBgn0002641	-0.18637	0.999887
FBgn0002643	0.430136	0.999887
FBgn0002645	0.0846641	0.999887
FBgn0002673	0.265545	0.999887
FBgn0002707	0.0549614	0.999887
FBgn0002709	-0.0146767	0.999887
FBgn0002715	-0.0124816	0.999887
FBgn0002716	0.0199359	0.999887
FBgn0002719	0.129345	0.999887
FBgn0002723	-0.056658	0.999887
FBgn0002732	0.213997	0.999887
FBgn0002733	0.0448229	0.999887
FBgn0002734	-0.0971284	0.999887
FBgn0002735	0.23593	0.999887
FBgn0002736	0.0832762	0.999887
FBgn0002772	-0.0378575	0.999887
FBgn0002774	0.203615	0.999887
FBgn0002775	-0.283781	0.999887
FBgn0002778	-0.276196	0.999887
FBgn0002781	0.218573	0.999887
FBgn0002783	0.102853	0.999887
FBgn0002787	0.0388441	0.999887
FBgn0002789	-0.212953	0.999887
FBgn0002791	0.0419902	0.999887
FBgn0002855	0.0270556	0.999887
FBgn0002856	-0.0903042	0.999887
FBgn0002862	-0.054922	0.999887
FBgn0002863	-0.144391	0.999887
FBgn0002865	0.0656317	0.999887
FBgn0002868	-0.0179985	0.999887
FBgn0002869	-0.0371897	0.999887
FBgn0002872	0.194404	0.999887
FBgn0002873	0.234764	0.999887
FBgn0002878	-0.116426	0.999887
FBgn0002887	0.0534061	0.999887
FBgn0002891	0.275508	0.999887
FBgn0002899	0.0938473	0.999887
FBgn0002901	0.402106	0.999887
FBgn0002905	0.165543	0.999887
FBgn0002906	0.38609	0.999887
FBgn0002914	0.17136	0.999887
FBgn0002921	0.0308822	0.999887
FBgn0002924	-0.0594179	0.999887
FBgn0002930	0.00701195	0.999887
FBgn0002931	-0.07433	0.999887
FBgn0002932	-0.0058761	0.999887
FBgn0002933	-0.0876136	0.999887
FBgn0002936	0.0141671	0.999887
FBgn0002938	-0.0749546	0.999887
FBgn0002939	-0.0295708	0.999887
FBgn0002940	-0.0700268	0.999887
FBgn0002945	0.207091	0.999887
FBgn0002948	0.029591	0.999887
FBgn0002962	0.319532	0.999887
FBgn0002973	0.3203	0.999887
FBgn0002985	0.400433	0.999887
FBgn0002989	0.127068	0.999887
FBgn0003002	0.21309	0.999887
FBgn0003008	-0.0770053	0.999887
FBgn0003015	0.392533	0.999887
FBgn0003016	-0.102897	0.999887
FBgn0003023	-0.16282	0.999887
FBgn0003028	0.229189	0.999887
FBgn0003034	0.0142092	0.999887
FBgn0003041	0.359572	0.999887
FBgn0003042	0.213956	0.999887
FBgn0003044	0.101471	0.999887
FBgn0003048	-0.163294	0.999887
FBgn0003053	-0.0730918	0.999887
FBgn0003057	-0.138133	0.999887
FBgn0003060	-0.0510175	0.999887
FBgn0003062	-0.104255	0.999887
FBgn0003065	-0.17332	0.999887
FBgn0003068	-0.0958285	0.999887
FBgn0003071	0.176646	0.999887
FBgn0003074	-0.177951	0.999887
FBgn0003079	0.00389501	0.999887
FBgn0003087	0.140575	0.999887
FBgn0003089	-0.0609546	0.999887
FBgn0003090	-0.0248909	0.999887
FBgn0003091	0.0151809	0.999887
FBgn0003093	-0.148136	0.999887
FBgn0003114	-0.213853	0.999887
FBgn0003116	0.109021	0.999887
FBgn0003117	0.159984	0.999887
FBgn0003118	-0.157131	0.999887
FBgn0003124	0.240011	0.999887
FBgn0003134	0.124325	0.999887
FBgn0003137	-0.235582	0.999887
FBgn0003139	0.12059	0.999887
FBgn0003141	0.123905	0.999887
FBgn0003145	0.213434	0.999887
FBgn0003149	-0.252743	0.999887
FBgn0003159	0.0959131	0.999887
FBgn0003162	-0.0329442	0.999887
FBgn0003165	0.150937	0.999887
FBgn0003169	0.0271181	0.999887
FBgn0003174	-0.138205	0.999887
FBgn0003175	0.105496	0.999887
FBgn0003187	0.0168502	0.999887
FBgn0003189	-0.00676991	0.999887
FBgn0003204	-0.0712131	0.999887
FBgn0003205	0.0922713	0.999887
FBgn0003206	-0.0885871	0.999887
FBgn0003209	0.114926	0.999887
FBgn0003210	0.210146	0.999887
FBgn0003218	-0.163519	0.999887
FBgn0003227	-0.11673	0.999887
FBgn0003231	0.178934	0.999887
FBgn0003248	0.0353138	0.999887
FBgn0003249	-0.133098	0.999887
FBgn0003250	-0.0947818	0.999887
FBgn0003254	0.490622	0.999887
FBgn0003256	0.123494	0.999887
FBgn0003257	-0.114808	0.999887
FBgn0003261	0.146899	0.999887
FBgn0003268	-0.0177132	0.999887
FBgn0003270	-0.181109	0.999887
FBgn0003275	-0.00734183	0.999887
FBgn0003278	-0.117777	0.999887
FBgn0003279	-0.155615	0.999887
FBgn0003285	0.139067	0.999887
FBgn0003292	-0.0414682	0.999887
FBgn0003295	-0.0109879	0.999887
FBgn0003300	0.180521	0.999887
FBgn0003301	0.167672	0.999887
FBgn0003302	-0.377575	0.999887
FBgn0003308	0.100667	0.999887
FBgn0003310	0.147323	0.999887
FBgn0003312	0.105004	0.999887
FBgn0003317	-0.0892209	0.999887
FBgn0003321	0.28759	0.999887
FBgn0003326	0.350214	0.999887
FBgn0003328	0.0208103	0.999887
FBgn0003330	-0.134272	0.999887
FBgn0003334	0.0936715	0.999887
FBgn0003339	0.0275413	0.999887
FBgn0003345	-0.0528864	0.999887
FBgn0003346	0.00332988	0.999887
FBgn0003353	0.0367119	0.999887
FBgn0003356	-0.0597739	0.999887
FBgn0003357	-0.101579	0.999887
FBgn0003358	-0.0406819	0.999887
FBgn0003360	0.0292568	0.999887
FBgn0003371	0.154655	0.999887
FBgn0003377	-0.0111837	0.999887
FBgn0003380	-0.0742627	0.999887
FBgn0003386	0.0410712	0.999887
FBgn0003388	0.13979	0.999887
FBgn0003390	-0.191031	0.999887
FBgn0003392	0.103086	0.999887
FBgn0003396	0.397525	0.999887
FBgn0003401	-0.0836862	0.999887
FBgn0003410	0.0851074	0.999887
FBgn0003411	0.418764	0.999887
FBgn0003415	0.297973	0.999887
FBgn0003416	0.253153	0.999887
FBgn0003423	-0.0245234	0.999887
FBgn0003429	-0.0432539	0.999887
FBgn0003430	0.446174	0.999887
FBgn0003435	-0.119015	0.999887
FBgn0003444	0.346943	0.999887
FBgn0003447	0.05485	0.999887
FBgn0003449	-0.0627182	0.999887
FBgn0003450	0.184628	0.999887
FBgn0003459	-0.05669	0.999887
FBgn0003460	0.131317	0.999887
FBgn0003462	-0.20539	0.999887
FBgn0003464	0.166692	0.999887
FBgn0003475	-0.0723263	0.999887
FBgn0003479	0.179499	0.999887
FBgn0003480	0.0709325	0.999887
FBgn0003482	0.155657	0.999887
FBgn0003483	0.240234	0.999887
FBgn0003486	0.114109	0.999887
FBgn0003495	0.281359	0.999887
FBgn0003499	-0.0119833	0.999887
FBgn0003502	0.346617	0.999887
FBgn0003507	0.206837	0.999887
FBgn0003512	0.00306446	0.999887
FBgn0003513	0.0892928	0.999887
FBgn0003514	-0.141055	0.999887
FBgn0003515	0.0556735	0.999887
FBgn0003517	-0.187135	0.999887
FBgn0003520	0.239109	0.999887
FBgn0003525	0.0881378	0.999887
FBgn0003527	-0.207805	0.999887
FBgn0003545	0.406127	0.999887
FBgn0003557	-0.0974673	0.999887
FBgn0003559	-0.0492346	0.999887
FBgn0003598	0.183905	0.999887
FBgn0003607	0.0838392	0.999887
FBgn0003612	0.376925	0.999887
FBgn0003638	0.137788	0.999887
FBgn0003651	-0.139432	0.999887
FBgn0003654	0.0730827	0.999887
FBgn0003655	0.161142	0.999887
FBgn0003656	0.185775	0.999887
FBgn0003660	0.0363387	0.999887
FBgn0003676	-0.152337	0.999887
FBgn0003683	0.0645372	0.999887
FBgn0003687	-0.361943	0.999887
FBgn0003701	0.301623	0.999887
FBgn0003710	0.0906628	0.999887
FBgn0003714	-0.333968	0.999887
FBgn0003719	0.0281812	0.999887
FBgn0003720	0.211157	0.999887
FBgn0003721	0.0294727	0.999887
FBgn0003731	-0.0340548	0.999887
FBgn0003733	0.120476	0.999887
FBgn0003741	0.283078	0.999887
FBgn0003742	0.0623908	0.999887
FBgn0003744	0.0433825	0.999887
FBgn0003747	0.0308656	0.999887
FBgn0003748	-0.130746	0.999887
FBgn0003751	-0.168492	0.999887
FBgn0003861	-0.127183	0.999887
FBgn0003862	0.0744343	0.999887
FBgn0003863	-0.155083	0.999887
FBgn0003865	0.165017	0.999887
FBgn0003866	0.126808	0.999887
FBgn0003867	-0.107239	0.999887
FBgn0003870	0.0867967	0.999887
FBgn0003882	0.344475	0.999887
FBgn0003884	0.0370312	0.999887
FBgn0003885	0.0876258	0.999887
FBgn0003886	-0.23869	0.999887
FBgn0003888	-0.11407	0.999887
FBgn0003889	0.241151	0.999887
FBgn0003890	-0.107746	0.999887
FBgn0003891	0.0772286	0.999887
FBgn0003892	0.45068	0.999887
FBgn0003896	0.0764559	0.999887
FBgn0003900	0.316163	0.999887
FBgn0003916	-0.0369664	0.999887
FBgn0003920	-0.00661806	0.999887
FBgn0003931	-0.346509	0.999887
FBgn0003935	-0.069826	0.999887
FBgn0003938	-0.102168	0.999887
FBgn0003941	-0.207269	0.999887
FBgn0003942	-0.165467	0.999887
FBgn0003943	0.234797	0.999887
FBgn0003944	-0.0145926	0.999887
FBgn0003950	-0.00728268	0.999887
FBgn0003961	0.0973331	0.999887
FBgn0003963	0.285556	0.999887
FBgn0003964	0.0655103	0.999887
FBgn0003965	0.0345089	0.999887
FBgn0003969	0.437466	0.999887
FBgn0003977	0.234511	0.999887
FBgn0003978	0.103558	0.999887
FBgn0003979	0.124222	0.999887
FBgn0003980	-0.0457359	0.999887
FBgn0003983	0.0588281	0.999887
FBgn0003984	-0.16003	0.999887
FBgn0003996	-0.0861927	0.999887
FBgn0003997	0.17484	0.999887
FBgn0004003	-0.108801	0.999887
FBgn0004034	-0.105651	0.999887
FBgn0004045	-0.143459	0.999887
FBgn0004047	-0.0912025	0.999887
FBgn0004049	0.0557818	0.999887
FBgn0004050	-0.208927	0.999887
FBgn0004053	0.357033	0.999887
FBgn0004054	0.062911	0.999887
FBgn0004055	0.102623	0.999887
FBgn0004057	-0.175454	0.999887
FBgn0004066	0.0791094	0.999887
FBgn0004087	-0.420109	0.999887
FBgn0004101	-0.104415	0.999887
FBgn0004102	0.161083	0.999887
FBgn0004103	0.14747	0.999887
FBgn0004106	0.0847336	0.999887
FBgn0004107	-0.212315	0.999887
FBgn0004108	0.300843	0.999887
FBgn0004110	0.107129	0.999887
FBgn0004117	-0.361728	0.999887
FBgn0004118	0.103243	0.999887
FBgn0004132	-0.0772423	0.999887
FBgn0004133	-0.0541221	0.999887
FBgn0004143	0.126815	0.999887
FBgn0004167	-0.0164703	0.999887
FBgn0004168	-0.0788262	0.999887
FBgn0004170	0.22067	0.999887
FBgn0004171	-0.0213677	0.999887
FBgn0004172	0.0690272	0.999887
FBgn0004173	-0.295548	0.999887
FBgn0004174	-0.283136	0.999887
FBgn0004175	-0.100185	0.999887
FBgn0004177	0.279733	0.999887
FBgn0004181	-0.200942	0.999887
FBgn0004185	-0.0127423	0.999887
FBgn0004186	-0.134606	0.999887
FBgn0004189	-0.106594	0.999887
FBgn0004190	0.00510411	0.999887
FBgn0004191	0.00770582	0.999887
FBgn0004192	0.0729591	0.999887
FBgn0004197	-0.074093	0.999887
FBgn0004198	0.179	0.999887
FBgn0004227	0.178989	0.999887
FBgn0004228	-0.108406	0.999887
FBgn0004237	0.214432	0.999887
FBgn0004240	0.104569	0.999887
FBgn0004242	-0.166775	0.999887
FBgn0004244	-0.154913	0.999887
FBgn0004359	-0.251514	0.999887
FBgn0004360	-0.01105	0.999887
FBgn0004362	0.041062	0.999887
FBgn0004363	0.0307032	0.999887
FBgn0004364	0.0824346	0.999887
FBgn0004367	0.202577	0.999887
FBgn0004368	0.243033	0.999887
FBgn0004369	-0.136795	0.999887
FBgn0004370	0.333959	0.999887
FBgn0004373	0.240652	0.999887
FBgn0004374	0.0981229	0.999887
FBgn0004379	0.0713296	0.999887
FBgn0004380	0.0295709	0.999887
FBgn0004381	0.212067	0.999887
FBgn0004387	0.131242	0.999887
FBgn0004390	0.0195009	0.999887
FBgn0004391	0.155393	0.999887
FBgn0004394	0.0599068	0.999887
FBgn0004395	-0.107844	0.999887
FBgn0004396	-0.116204	0.999887
FBgn0004397	-0.201285	0.999887
FBgn0004400	-0.00980201	0.999887
FBgn0004401	0.181028	0.999887
FBgn0004403	-0.110533	0.999887
FBgn0004406	0.285925	0.999887
FBgn0004414	0.29859	0.999887
FBgn0004419	0.0335812	0.999887
FBgn0004425	-0.192474	0.999887
FBgn0004426	-0.290538	0.999887
FBgn0004427	-0.18374	0.999887
FBgn0004428	-0.295954	0.999887
FBgn0004429	-0.0197196	0.999887
FBgn0004430	-0.0413326	0.999887
FBgn0004431	-0.121549	0.999887
FBgn0004432	0.138976	0.999887
FBgn0004435	-0.244874	0.999887
FBgn0004436	0.309928	0.999887
FBgn0004449	0.315477	0.999887
FBgn0004456	-0.17935	0.999887
FBgn0004463	0.181994	0.999887
FBgn0004465	-0.272713	0.999887
FBgn0004507	0.0508879	0.999887
FBgn0004509	0.0557263	0.999887
FBgn0004510	-0.153168	0.999887
FBgn0004511	-0.0383595	0.999887
FBgn0004512	0.107791	0.999887
FBgn0004552	-0.099863	0.999887
FBgn0004556	0.0789133	0.999887
FBgn0004567	0.0364384	0.999887
FBgn0004569	-0.0633041	0.999887
FBgn0004573	-0.0247038	0.999887
FBgn0004574	0.235537	0.999887
FBgn0004575	-0.167825	0.999887
FBgn0004580	-0.21671	0.999887
FBgn0004581	-0.0352059	0.999887
FBgn0004583	0.116352	0.999887
FBgn0004584	-0.0756408	0.999887
FBgn0004587	0.0703084	0.999887
FBgn0004595	0.0191355	0.999887
FBgn0004597	-0.000809285	0.999887
FBgn0004606	0.194244	0.999887
FBgn0004607	0.0918415	0.999887
FBgn0004611	0.0225007	0.999887
FBgn0004618	0.0339651	0.999887
FBgn0004620	-0.0404638	0.999887
FBgn0004623	-0.0999025	0.999887
FBgn0004629	0.00473646	0.999887
FBgn0004635	0.208793	0.999887
FBgn0004636	0.0226408	0.999887
FBgn0004638	0.102811	0.999887
FBgn0004643	-0.0368809	0.999887
FBgn0004644	-0.0171862	0.999887
FBgn0004646	-0.0141424	0.999887
FBgn0004647	0.222712	0.999887
FBgn0004648	0.132015	0.999887
FBgn0004649	0.227161	0.999887
FBgn0004650	0.229633	0.999887
FBgn0004652	0.0939324	0.999887
FBgn0004654	-0.279996	0.999887
FBgn0004655	0.0514516	0.999887
FBgn0004656	0.106504	0.999887
FBgn0004657	0.404963	0.999887
FBgn0004698	0.300687	0.999887
FBgn0004779	-0.0285095	0.999887
FBgn0004780	-0.143402	0.999887
FBgn0004783	-0.0742649	0.999887
FBgn0004784	-0.0380876	0.999887
FBgn0004795	-0.0183609	0.999887
FBgn0004797	-0.111552	0.999887
FBgn0004811	-0.127638	0.999887
FBgn0004828	0.0404821	0.999887
FBgn0004832	0.0247101	0.999887
FBgn0004837	0.157464	0.999887
FBgn0004838	-0.0162501	0.999887
FBgn0004839	-0.194328	0.999887
FBgn0004852	-0.028031	0.999887
FBgn0004855	0.0480015	0.999887
FBgn0004856	-0.0743202	0.999887
FBgn0004858	-0.0780287	0.999887
FBgn0004859	0.244322	0.999887
FBgn0004860	-0.024006	0.999887
FBgn0004861	-0.0140864	0.999887
FBgn0004862	0.0569456	0.999887
FBgn0004863	-0.0419393	0.999887
FBgn0004864	0.272713	0.999887
FBgn0004865	-0.0880665	0.999887
FBgn0004867	-0.337559	0.999887
FBgn0004868	0.146869	0.999887
FBgn0004870	-0.027309	0.999887
FBgn0004872	0.0273738	0.999887
FBgn0004875	0.158303	0.999887
FBgn0004876	-0.0802927	0.999887
FBgn0004880	-0.0405984	0.999887
FBgn0004882	0.0350534	0.999887
FBgn0004885	-0.0524155	0.999887
FBgn0004888	-0.0157345	0.999887
FBgn0004889	0.152229	0.999887
FBgn0004892	0.0483124	0.999887
FBgn0004893	0.0199912	0.999887
FBgn0004896	0.0570741	0.999887
FBgn0004898	-0.0111292	0.999887
FBgn0004901	-0.0833234	0.999887
FBgn0004903	-0.0740576	0.999887
FBgn0004907	-0.14369	0.999887
FBgn0004908	-0.0748875	0.999887
FBgn0004910	-0.147597	0.999887
FBgn0004911	0.0588157	0.999887
FBgn0004913	0.132145	0.999887
FBgn0004914	0.0285815	0.999887
FBgn0004915	0.0653753	0.999887
FBgn0004919	0.0570846	0.999887
FBgn0004921	-0.0282494	0.999887
FBgn0004924	-0.0453984	0.999887
FBgn0004926	-0.083023	0.999887
FBgn0004956	0.115735	0.999887
FBgn0004957	-0.0333154	0.999887
FBgn0004959	0.176347	0.999887
FBgn0005198	0.429283	0.999887
FBgn0005278	0.156864	0.999887
FBgn0005322	-0.211998	0.999887
FBgn0005355	0.099674	0.999887
FBgn0005386	0.338879	0.999887
FBgn0005390	-0.0113077	0.999887
FBgn0005391	-0.0319114	0.999887
FBgn0005411	0.17401	0.999887
FBgn0005427	-0.0807265	0.999887
FBgn0005533	-0.336152	0.999887
FBgn0005536	0.241638	0.999887
FBgn0005558	0.00307871	0.999887
FBgn0005561	-0.0651803	0.999887
FBgn0005564	-0.106342	0.999887
FBgn0005585	0.027522	0.999887
FBgn0005586	-0.174674	0.999887
FBgn0005590	-0.249809	0.999887
FBgn0005592	-0.0640885	0.999887
FBgn0005593	-0.109672	0.999887
FBgn0005596	0.383931	0.999887
FBgn0005612	0.2415	0.999887
FBgn0005614	0.062866	0.999887
FBgn0005616	0.159899	0.999887
FBgn0005617	0.295693	0.999887
FBgn0005626	-0.0930759	0.999887
FBgn0005631	0.0957893	0.999887
FBgn0005632	0.168516	0.999887
FBgn0005633	0.080348	0.999887
FBgn0005636	0.0681127	0.999887
FBgn0005638	-0.200958	0.999887
FBgn0005640	-0.0420678	0.999887
FBgn0005642	0.0739925	0.999887
FBgn0005648	0.38627	0.999887
FBgn0005649	0.100095	0.999887
FBgn0005655	-0.336444	0.999887
FBgn0005658	-0.0129351	0.999887
FBgn0005659	0.0205227	0.999887
FBgn0005660	-0.143356	0.999887
FBgn0005664	0.044883	0.999887
FBgn0005666	-0.176413	0.999887
FBgn0005670	-0.0608811	0.999887
FBgn0005671	-0.0643378	0.999887
FBgn0005672	-0.0697545	0.999887
FBgn0005674	-0.0191344	0.999887
FBgn0005677	0.056876	0.999887
FBgn0005683	0.0272367	0.999887
FBgn0005694	0.131043	0.999887
FBgn0005695	-0.0929366	0.999887
FBgn0005696	0.22605	0.999887
FBgn0005771	0.141941	0.999887
FBgn0005775	-0.153698	0.999887
FBgn0005777	0.0850569	0.999887
FBgn0008635	0.0463502	0.999887
FBgn0008636	-0.0753625	0.999887
FBgn0010014	-0.161395	0.999887
FBgn0010015	0.00321798	0.999887
FBgn0010019	-0.0440765	0.999887
FBgn0010038	-0.0394547	0.999887
FBgn0010039	-0.102565	0.999887
FBgn0010040	-0.162899	0.999887
FBgn0010041	0.246547	0.999887
FBgn0010042	0.127951	0.999887
FBgn0010043	0.0462446	0.999887
FBgn0010044	-0.117558	0.999887
FBgn0010051	0.0391757	0.999887
FBgn0010052	0.0875267	0.999887
FBgn0010053	-0.0774158	0.999887
FBgn0010097	0.275115	0.999887
FBgn0010100	0.356103	0.999887
FBgn0010105	-0.0648081	0.999887
FBgn0010109	0.205772	0.999887
FBgn0010113	0.244882	0.999887
FBgn0010114	0.0918415	0.999887
FBgn0010173	0.127446	0.999887
FBgn0010194	0.252403	0.999887
FBgn0010198	-0.216327	0.999887
FBgn0010213	-0.248755	0.999887
FBgn0010215	-0.0902804	0.999887
FBgn0010217	0.155435	0.999887
FBgn0010220	0.182002	0.999887
FBgn0010222	-0.194294	0.999887
FBgn0010223	-0.165182	0.999887
FBgn0010225	-0.00988703	0.999887
FBgn0010226	0.0629388	0.999887
FBgn0010235	0.0480409	0.999887
FBgn0010238	0.332832	0.999887
FBgn0010240	0.0308892	0.999887
FBgn0010241	-0.0004044	0.999887
FBgn0010246	0.0226523	0.999887
FBgn0010247	0.399005	0.999887
FBgn0010263	0.0433514	0.999887
FBgn0010265	-0.27822	0.999887
FBgn0010269	-0.132378	0.999887
FBgn0010278	-0.156094	0.999887
FBgn0010280	0.185357	0.999887
FBgn0010282	0.11639	0.999887
FBgn0010287	0.110815	0.999887
FBgn0010288	-0.0666986	0.999887
FBgn0010292	-0.156399	0.999887
FBgn0010300	0.353565	0.999887
FBgn0010303	0.0561651	0.999887
FBgn0010309	-0.0921264	0.999887
FBgn0010313	0.0560125	0.999887
FBgn0010314	-0.0618838	0.999887
FBgn0010315	0.194075	0.999887
FBgn0010316	0.122968	0.999887
FBgn0010317	0.260176	0.999887
FBgn0010323	0.0311168	0.999887
FBgn0010328	0.161951	0.999887
FBgn0010333	0.18795	0.999887
FBgn0010339	-0.393803	0.999887
FBgn0010340	0.0336872	0.999887
FBgn0010341	-0.063645	0.999887
FBgn0010342	0.123074	0.999887
FBgn0010348	0.296864	0.999887
FBgn0010350	0.17127	0.999887
FBgn0010352	-0.081892	0.999887
FBgn0010355	0.454169	0.999887
FBgn0010356	0.0366677	0.999887
FBgn0010357	-0.153986	0.999887
FBgn0010358	-0.188795	0.999887
FBgn0010379	0.112863	0.999887
FBgn0010380	-0.011011	0.999887
FBgn0010382	0.32522	0.999887
FBgn0010383	-0.151278	0.999887
FBgn0010385	0.0359215	0.999887
FBgn0010387	-0.0730854	0.999887
FBgn0010388	-0.0844953	0.999887
FBgn0010389	-0.0275205	0.999887
FBgn0010391	-0.303211	0.999887
FBgn0010395	0.0130125	0.999887
FBgn0010397	0.00443563	0.999887
FBgn0010398	-0.1838	0.999887
FBgn0010401	-0.0682916	0.999887
FBgn0010403	0.0215506	0.999887
FBgn0010406	-0.413004	0.999887
FBgn0010407	-0.0133747	0.999887
FBgn0010408	-0.184135	0.999887
FBgn0010409	-0.215853	0.999887
FBgn0010411	-0.314177	0.999887
FBgn0010412	-0.237717	0.999887
FBgn0010415	0.153582	0.999887
FBgn0010416	0.0399716	0.999887
FBgn0010417	0.017423	0.999887
FBgn0010421	0.413656	0.999887
FBgn0010422	0.0384206	0.999887
FBgn0010424	-0.165962	0.999887
FBgn0010425	-0.157716	0.999887
FBgn0010433	-0.0743339	0.999887
FBgn0010434	0.0181343	0.999887
FBgn0010435	0.0501321	0.999887
FBgn0010438	0.0034666	0.999887
FBgn0010441	0.134924	0.999887
FBgn0010453	-0.260317	0.999887
FBgn0010470	0.0542385	0.999887
FBgn0010473	-0.227817	0.999887
FBgn0010482	0.0327236	0.999887
FBgn0010488	0.10615	0.999887
FBgn0010497	0.00657412	0.999887
FBgn0010501	0.0181024	0.999887
FBgn0010504	0.0913669	0.999887
FBgn0010516	0.0126203	0.999887
FBgn0010520	-0.320415	0.999887
FBgn0010531	0.066808	0.999887
FBgn0010548	-0.197225	0.999887
FBgn0010549	-0.0910121	0.999887
FBgn0010551	-0.182497	0.999887
FBgn0010575	0.379336	0.999887
FBgn0010583	0.0866636	0.999887
FBgn0010590	-0.251567	0.999887
FBgn0010591	-0.0431101	0.999887
FBgn0010602	0.0862731	0.999887
FBgn0010607	-0.0626586	0.999887
FBgn0010611	-0.0713563	0.999887
FBgn0010612	-0.336749	0.999887
FBgn0010620	0.166069	0.999887
FBgn0010621	0.0477971	0.999887
FBgn0010622	0.0231527	0.999887
FBgn0010638	-0.352804	0.999887
FBgn0010651	-0.0216369	0.999887
FBgn0010741	-0.00520698	0.999887
FBgn0010747	0.341093	0.999887
FBgn0010750	-0.291106	0.999887
FBgn0010762	-0.0325232	0.999887
FBgn0010768	-0.00995235	0.999887
FBgn0010770	0.167797	0.999887
FBgn0010772	0.0759755	0.999887
FBgn0010774	0.0758346	0.999887
FBgn0010786	-0.0430068	0.999887
FBgn0010803	-0.135704	0.999887
FBgn0010808	-0.117489	0.999887
FBgn0010812	-0.0405584	0.999887
FBgn0010825	0.321692	0.999887
FBgn0010830	0.0860175	0.999887
FBgn0010877	0.098258	0.999887
FBgn0010894	0.09021	0.999887
FBgn0010905	0.0862076	0.999887
FBgn0010909	-0.00414323	0.999887
FBgn0010926	0.125237	0.999887
FBgn0011016	0.0374061	0.999887
FBgn0011020	-0.151705	0.999887
FBgn0011202	0.0897507	0.999887
FBgn0011204	0.0448248	0.999887
FBgn0011205	0.0216278	0.999887
FBgn0011206	-0.311945	0.999887
FBgn0011207	0.406763	0.999887
FBgn0011211	0.198489	0.999887
FBgn0011217	0.149434	0.999887
FBgn0011224	0.350199	0.999887
FBgn0011225	-0.0373417	0.999887
FBgn0011227	-0.353684	0.999887
FBgn0011232	-0.116934	0.999887
FBgn0011236	-0.0406736	0.999887
FBgn0011239	0.0018546	0.999887
FBgn0011241	-0.270337	0.999887
FBgn0011244	-0.0388746	0.999887
FBgn0011259	0.371332	0.999887
FBgn0011260	0.364391	0.999887
FBgn0011270	-0.0862451	0.999887
FBgn0011272	-0.114572	0.999887
FBgn0011274	-0.101405	0.999887
FBgn0011279	0.0191008	0.999887
FBgn0011280	-0.191389	0.999887
FBgn0011281	0.034116	0.999887
FBgn0011282	-0.0855976	0.999887
FBgn0011283	-0.0473439	0.999887
FBgn0011284	-0.272942	0.999887
FBgn0011286	0.0353688	0.999887
FBgn0011288	-0.0207764	0.999887
FBgn0011289	0.0889477	0.999887
FBgn0011290	0.136579	0.999887
FBgn0011291	0.268551	0.999887
FBgn0011293	0.214626	0.999887
FBgn0011294	0.0450564	0.999887
FBgn0011296	-0.102488	0.999887
FBgn0011297	-0.140035	0.999887
FBgn0011300	-0.0198587	0.999887
FBgn0011305	0.153149	0.999887
FBgn0011327	0.098692	0.999887
FBgn0011335	0.0388254	0.999887
FBgn0011336	-0.117713	0.999887
FBgn0011361	-0.174437	0.999887
FBgn0011455	-0.253647	0.999887
FBgn0011474	0.179537	0.999887
FBgn0011476	-0.0337528	0.999887
FBgn0011481	0.221483	0.999887
FBgn0011509	-0.0254041	0.999887
FBgn0011554	0.137793	0.999887
FBgn0011555	-0.141457	0.999887
FBgn0011556	-0.117761	0.999887
FBgn0011559	-0.0477714	0.999887
FBgn0011566	-0.152893	0.999887
FBgn0011570	0.150794	0.999887
FBgn0011571	0.0896464	0.999887
FBgn0011573	0.0878181	0.999887
FBgn0011576	0.0346731	0.999887
FBgn0011581	-0.0589197	0.999887
FBgn0011582	0.00332364	0.999887
FBgn0011584	-0.153634	0.999887
FBgn0011586	-0.356936	0.999887
FBgn0011591	-0.0606693	0.999887
FBgn0011592	0.347108	0.999887
FBgn0011596	0.0861303	0.999887
FBgn0011603	-0.29014	0.999887
FBgn0011604	0.288536	0.999887
FBgn0011606	0.132077	0.999887
FBgn0011638	0.0285912	0.999887
FBgn0011640	0.0592005	0.999887
FBgn0011642	-0.102468	0.999887
FBgn0011648	0.18487	0.999887
FBgn0011653	0.00444914	0.999887
FBgn0011655	0.111239	0.999887
FBgn0011656	0.22033	0.999887
FBgn0011659	-0.122204	0.999887
FBgn0011660	0.135056	0.999887
FBgn0011661	-0.0507925	0.999887
FBgn0011666	0.0199819	0.999887
FBgn0011668	-0.0283227	0.999887
FBgn0011669	0.0240078	0.999887
FBgn0011670	-0.00982106	0.999887
FBgn0011672	-0.0746586	0.999887
FBgn0011674	-0.00141384	0.999887
FBgn0011692	0.262073	0.999887
FBgn0011693	0.0533494	0.999887
FBgn0011694	0.192393	0.999887
FBgn0011695	-0.127056	0.999887
FBgn0011701	-0.064761	0.999887
FBgn0011703	0.224172	0.999887
FBgn0011704	-0.235198	0.999887
FBgn0011705	-0.198958	0.999887
FBgn0011706	0.0361263	0.999887
FBgn0011708	-0.193757	0.999887
FBgn0011710	0.0976147	0.999887
FBgn0011715	0.000298177	0.999887
FBgn0011722	-0.285169	0.999887
FBgn0011725	-0.000314423	0.999887
FBgn0011726	0.184748	0.999887
FBgn0011737	0.298096	0.999887
FBgn0011739	0.0222038	0.999887
FBgn0011740	0.113165	0.999887
FBgn0011741	0.113786	0.999887
FBgn0011742	0.28372	0.999887
FBgn0011743	-0.0363257	0.999887
FBgn0011745	-0.0261993	0.999887
FBgn0011746	-0.0107432	0.999887
FBgn0011747	0.357498	0.999887
FBgn0011754	-0.017318	0.999887
FBgn0011760	0.00997415	0.999887
FBgn0011762	-0.1404	0.999887
FBgn0011763	-0.159326	0.999887
FBgn0011766	0.00504401	0.999887
FBgn0011768	-0.324137	0.999887
FBgn0011769	-0.207281	0.999887
FBgn0011770	-0.244148	0.999887
FBgn0011771	-0.139109	0.999887
FBgn0011774	0.0530813	0.999887
FBgn0011787	-0.293772	0.999887
FBgn0011802	0.201863	0.999887
FBgn0011817	0.0817778	0.999887
FBgn0011818	0.275753	0.999887
FBgn0011822	-0.0737561	0.999887
FBgn0011824	0.0200839	0.999887
FBgn0011826	0.0316642	0.999887
FBgn0011828	-0.124567	0.999887
FBgn0011834	0.0211256	0.999887
FBgn0011836	0.0840129	0.999887
FBgn0011837	0.254468	0.999887
FBgn0011880	-0.0423807	0.999887
FBgn0011887	-0.0618957	0.999887
FBgn0011889	-0.0225904	0.999887
FBgn0011897	0.00192697	0.999887
FBgn0011982	0.0154415	0.999887
FBgn0012034	-0.326933	0.999887
FBgn0012036	0.0339761	0.999887
FBgn0012037	-0.246093	0.999887
FBgn0012042	0.0469586	0.999887
FBgn0012051	0.160394	0.999887
FBgn0012058	-0.10481	0.999887
FBgn0012344	-0.108425	0.999887
FBgn0013263	0.193291	0.999887
FBgn0013269	-0.0137152	0.999887
FBgn0013272	-0.0689051	0.999887
FBgn0013276	0.049987	0.999887
FBgn0013278	0.000724873	0.999887
FBgn0013279	-0.0958988	0.999887
FBgn0013301	-0.0126265	0.999887
FBgn0013303	-0.0853182	0.999887
FBgn0013305	-0.2517	0.999887
FBgn0013307	-0.0742584	0.999887
FBgn0013323	-0.119806	0.999887
FBgn0013325	-0.166823	0.999887
FBgn0013334	-0.125173	0.999887
FBgn0013342	-0.199075	0.999887
FBgn0013343	0.0575699	0.999887
FBgn0013347	0.0809965	0.999887
FBgn0013348	0.0863045	0.999887
FBgn0013432	-0.0558565	0.999887
FBgn0013433	-0.102538	0.999887
FBgn0013435	-0.0680345	0.999887
FBgn0013467	-0.102784	0.999887
FBgn0013469	-0.160658	0.999887
FBgn0013531	0.159794	0.999887
FBgn0013548	-0.234691	0.999887
FBgn0013563	-0.0186487	0.999887
FBgn0013576	0.206812	0.999887
FBgn0013672	-0.110883	0.999887
FBgn0013673	-0.0580573	0.999887
FBgn0013674	-0.115482	0.999887
FBgn0013675	-0.298981	0.999887
FBgn0013676	0.0501238	0.999887
FBgn0013678	-0.0582084	0.999887
FBgn0013679	0.384406	0.999887
FBgn0013680	-0.0336875	0.999887
FBgn0013681	0.0949482	0.999887
FBgn0013683	-0.271855	0.999887
FBgn0013684	0.148465	0.999887
FBgn0013685	0.000856977	0.999887
FBgn0013686	0.34039	0.999887
FBgn0013689	-0.419213	0.999887
FBgn0013690	0.227099	0.999887
FBgn0013691	-0.151069	0.999887
FBgn0013692	-0.0769301	0.999887
FBgn0013693	-0.0341672	0.999887
FBgn0013694	-0.0197208	0.999887
FBgn0013695	-0.432085	0.999887
FBgn0013696	-0.00738532	0.999887
FBgn0013697	-0.250283	0.999887
FBgn0013698	0.216197	0.999887
FBgn0013699	-0.0509877	0.999887
FBgn0013700	-0.13166	0.999887
FBgn0013702	0.124067	0.999887
FBgn0013703	-0.098203	0.999887
FBgn0013707	0.0855731	0.999887
FBgn0013708	-0.147326	0.999887
FBgn0013709	-0.00125171	0.999887
FBgn0013710	-0.0590266	0.999887
FBgn0013717	0.00240029	0.999887
FBgn0013718	0.38429	0.999887
FBgn0013720	0.294143	0.999887
FBgn0013725	0.0797285	0.999887
FBgn0013726	0.00210218	0.999887
FBgn0013732	0.290294	0.999887
FBgn0013733	0.0233736	0.999887
FBgn0013746	0.208472	0.999887
FBgn0013749	-0.00221958	0.999887
FBgn0013750	0.0126533	0.999887
FBgn0013751	-0.0446753	0.999887
FBgn0013753	0.0170022	0.999887
FBgn0013755	-0.352455	0.999887
FBgn0013756	0.334981	0.999887
FBgn0013759	0.157815	0.999887
FBgn0013762	-0.243562	0.999887
FBgn0013763	0.146846	0.999887
FBgn0013764	0.0720212	0.999887
FBgn0013765	0.287748	0.999887
FBgn0013767	-0.056321	0.999887
FBgn0013771	0.112918	0.999887
FBgn0013772	-0.0529436	0.999887
FBgn0013773	-0.0864568	0.999887
FBgn0013799	0.0615291	0.999887
FBgn0013810	0.0201126	0.999887
FBgn0013811	0.0433497	0.999887
FBgn0013813	0.0677143	0.999887
FBgn0013949	0.0825573	0.999887
FBgn0013953	-0.0529783	0.999887
FBgn0013954	0.00748345	0.999887
FBgn0013972	0.0197833	0.999887
FBgn0013973	0.0181537	0.999887
FBgn0013981	-0.146797	0.999887
FBgn0013983	-0.279397	0.999887
FBgn0013987	0.156472	0.999887
FBgn0013995	-0.128117	0.999887
FBgn0013997	0.0350757	0.999887
FBgn0014000	-0.00276147	0.999887
FBgn0014002	0.199581	0.999887
FBgn0014006	0.0092667	0.999887
FBgn0014009	0.0470703	0.999887
FBgn0014010	0.11131	0.999887
FBgn0014011	0.170169	0.999887
FBgn0014018	-0.035792	0.999887
FBgn0014019	-0.0634099	0.999887
FBgn0014020	0.0308643	0.999887
FBgn0014022	-0.302308	0.999887
FBgn0014023	-0.15142	0.999887
FBgn0014024	-0.0531996	0.999887
FBgn0014026	-0.215396	0.999887
FBgn0014028	-0.142194	0.999887
FBgn0014029	0.196957	0.999887
FBgn0014031	-0.128681	0.999887
FBgn0014032	0.0960348	0.999887
FBgn0014033	0.106771	0.999887
FBgn0014037	0.235009	0.999887
FBgn0014073	-0.0803883	0.999887
FBgn0014075	0.139737	0.999887
FBgn0014092	-0.169567	0.999887
FBgn0014127	0.263972	0.999887
FBgn0014133	0.015233	0.999887
FBgn0014135	0.121274	0.999887
FBgn0014141	0.189675	0.999887
FBgn0014143	0.17247	0.999887
FBgn0014163	0.189283	0.999887
FBgn0014179	0.0168233	0.999887
FBgn0014184	0.000884578	0.999887
FBgn0014269	0.459689	0.999887
FBgn0014340	0.393245	0.999887
FBgn0014342	0.0649911	0.999887
FBgn0014343	0.215575	0.999887
FBgn0014366	0.0468075	0.999887
FBgn0014380	-0.217525	0.999887
FBgn0014388	0.0300131	0.999887
FBgn0014391	-0.153198	0.999887
FBgn0014396	-0.0661517	0.999887
FBgn0014411	0.206719	0.999887
FBgn0014455	-0.242392	0.999887
FBgn0014465	-0.0359795	0.999887
FBgn0014469	-0.159189	0.999887
FBgn0014857	-0.0428108	0.999887
FBgn0014859	0.0914745	0.999887
FBgn0014861	0.0551965	0.999887
FBgn0014863	-0.160608	0.999887
FBgn0014865	-0.15714	0.999887
FBgn0014868	0.0364932	0.999887
FBgn0014869	-0.291173	0.999887
FBgn0014870	0.0789221	0.999887
FBgn0014877	-0.226522	0.999887
FBgn0014879	0.0155161	0.999887
FBgn0014903	0.0282787	0.999887
FBgn0014906	-0.0914719	0.999887
FBgn0014930	-0.0332685	0.999887
FBgn0014931	0.382059	0.999887
FBgn0015000	-0.0840037	0.999887
FBgn0015001	-0.0304693	0.999887
FBgn0015010	-0.053264	0.999887
FBgn0015011	-0.033413	0.999887
FBgn0015019	-0.127181	0.999887
FBgn0015024	0.0560464	0.999887
FBgn0015025	-0.204042	0.999887
FBgn0015031	-0.257093	0.999887
FBgn0015032	-0.0569736	0.999887
FBgn0015033	-0.0771278	0.999887
FBgn0015034	-0.0092598	0.999887
FBgn0015035	0.00107787	0.999887
FBgn0015036	-0.00946752	0.999887
FBgn0015037	-0.0204061	0.999887
FBgn0015038	-0.11234	0.999887
FBgn0015039	-0.112012	0.999887
FBgn0015040	-0.181227	0.999887
FBgn0015075	0.040565	0.999887
FBgn0015218	0.109492	0.999887
FBgn0015221	0.00802085	0.999887
FBgn0015222	-0.195153	0.999887
FBgn0015239	0.195348	0.999887
FBgn0015240	0.0210782	0.999887
FBgn0015245	-0.0431142	0.999887
FBgn0015247	0.035226	0.999887
FBgn0015268	-0.0378792	0.999887
FBgn0015269	0.244278	0.999887
FBgn0015270	-0.231788	0.999887
FBgn0015271	-0.149712	0.999887
FBgn0015277	-0.135406	0.999887
FBgn0015278	0.165866	0.999887
FBgn0015279	0.0129115	0.999887
FBgn0015282	-0.0380754	0.999887
FBgn0015283	0.174604	0.999887
FBgn0015286	0.130447	0.999887
FBgn0015288	-0.164209	0.999887
FBgn0015295	0.260494	0.999887
FBgn0015296	-0.0144556	0.999887
FBgn0015298	-0.438599	0.999887
FBgn0015299	-0.0179664	0.999887
FBgn0015316	-0.0435095	0.999887
FBgn0015320	0.0393605	0.999887
FBgn0015321	0.0863766	0.999887
FBgn0015331	0.188896	0.999887
FBgn0015336	0.190638	0.999887
FBgn0015338	-0.252308	0.999887
FBgn0015351	0.1457	0.999887
FBgn0015359	-0.193803	0.999887
FBgn0015360	0.0299396	0.999887
FBgn0015371	0.234726	0.999887
FBgn0015372	0.0264791	0.999887
FBgn0015376	0.239517	0.999887
FBgn0015379	-0.186067	0.999887
FBgn0015380	0.052561	0.999887
FBgn0015391	0.26237	0.999887
FBgn0015396	0.0914376	0.999887
FBgn0015399	-0.284879	0.999887
FBgn0015400	-0.0421602	0.999887
FBgn0015402	0.176562	0.999887
FBgn0015509	0.194375	0.999887
FBgn0015513	0.0193453	0.999887
FBgn0015519	-0.0870998	0.999887
FBgn0015520	0.0236508	0.999887
FBgn0015522	-0.148671	0.999887
FBgn0015524	-0.0740546	0.999887
FBgn0015527	0.0492089	0.999887
FBgn0015541	-0.159413	0.999887
FBgn0015543	-0.0662474	0.999887
FBgn0015544	0.216783	0.999887
FBgn0015546	0.269421	0.999887
FBgn0015550	0.0183274	0.999887
FBgn0015553	0.054091	0.999887
FBgn0015558	0.313463	0.999887
FBgn0015568	-0.0839048	0.999887
FBgn0015569	0.206731	0.999887
FBgn0015570	-0.109794	0.999887
FBgn0015571	-0.0133685	0.999887
FBgn0015572	-0.0837415	0.999887
FBgn0015574	0.0181537	0.999887
FBgn0015575	-0.0192564	0.999887
FBgn0015576	-0.277087	0.999887
FBgn0015577	-0.211679	0.999887
FBgn0015584	-0.0706484	0.999887
FBgn0015585	-0.0772599	0.999887
FBgn0015589	0.0938582	0.999887
FBgn0015591	-0.230215	0.999887
FBgn0015600	0.340467	0.999887
FBgn0015602	0.132519	0.999887
FBgn0015609	0.0495893	0.999887
FBgn0015614	0.155198	0.999887
FBgn0015615	0.233566	0.999887
FBgn0015618	-0.12917	0.999887
FBgn0015621	-0.222351	0.999887
FBgn0015622	0.0572165	0.999887
FBgn0015623	0.0553729	0.999887
FBgn0015625	0.333224	0.999887
FBgn0015663	-0.0850988	0.999887
FBgn0015664	0.239334	0.999887
FBgn0015714	0.0245992	0.999887
FBgn0015721	0.044663	0.999887
FBgn0015737	0.0878357	0.999887
FBgn0015754	-0.129745	0.999887
FBgn0015756	-0.0667853	0.999887
FBgn0015765	-0.181769	0.999887
FBgn0015766	-0.230741	0.999887
FBgn0015772	0.0841091	0.999887
FBgn0015773	-0.0162727	0.999887
FBgn0015774	0.0435761	0.999887
FBgn0015776	0.285384	0.999887
FBgn0015777	-0.124919	0.999887
FBgn0015778	0.109176	0.999887
FBgn0015781	-0.409814	0.999887
FBgn0015789	0.257922	0.999887
FBgn0015790	0.279241	0.999887
FBgn0015791	0.0836631	0.999887
FBgn0015793	-0.206459	0.999887
FBgn0015794	-0.127566	0.999887
FBgn0015795	0.0839746	0.999887
FBgn0015797	0.0420248	0.999887
FBgn0015799	-0.0307894	0.999887
FBgn0015801	-0.00341871	0.999887
FBgn0015803	0.100172	0.999887
FBgn0015808	-0.234875	0.999887
FBgn0015818	0.168911	0.999887
FBgn0015828	-0.271189	0.999887
FBgn0015829	-0.0863736	0.999887
FBgn0015831	-0.0378648	0.999887
FBgn0015834	-0.245793	0.999887
FBgn0015838	-0.079397	0.999887
FBgn0015872	0.0306625	0.999887
FBgn0015903	0.251053	0.999887
FBgn0015904	0.0222691	0.999887
FBgn0015905	0.361425	0.999887
FBgn0015919	-0.0191876	0.999887
FBgn0015924	0.0668744	0.999887
FBgn0015925	0.130078	0.999887
FBgn0015926	0.169759	0.999887
FBgn0015929	0.185987	0.999887
FBgn0015949	0.375551	0.999887
FBgn0016013	-0.0335243	0.999887
FBgn0016031	0.139404	0.999887
FBgn0016032	-0.135868	0.999887
FBgn0016034	0.0943769	0.999887
FBgn0016036	0.0018491	0.999887
FBgn0016038	0.143239	0.999887
FBgn0016041	0.0841181	0.999887
FBgn0016053	-0.326812	0.999887
FBgn0016054	-0.0363281	0.999887
FBgn0016059	-0.0153468	0.999887
FBgn0016061	-0.114803	0.999887
FBgn0016070	0.113542	0.999887
FBgn0016075	-0.401682	0.999887
FBgn0016076	-0.143519	0.999887
FBgn0016078	0.0460668	0.999887
FBgn0016080	-0.00204885	0.999887
FBgn0016081	0.181977	0.999887
FBgn0016119	0.00048576	0.999887
FBgn0016120	-0.121839	0.999887
FBgn0016122	0.198757	0.999887
FBgn0016123	-0.00123168	0.999887
FBgn0016126	-0.33668	0.999887
FBgn0016131	0.211006	0.999887
FBgn0016641	0.187651	0.999887
FBgn0016650	0.131142	0.999887
FBgn0016672	0.0266042	0.999887
FBgn0016675	-0.0425865	0.999887
FBgn0016684	0.000994856	0.999887
FBgn0016685	0.0654642	0.999887
FBgn0016687	-0.265868	0.999887
FBgn0016691	-0.368765	0.999887
FBgn0016693	-0.148104	0.999887
FBgn0016694	-0.114507	0.999887
FBgn0016696	0.134189	0.999887
FBgn0016697	-0.139396	0.999887
FBgn0016698	-0.225854	0.999887
FBgn0016701	-0.182052	0.999887
FBgn0016715	-0.137071	0.999887
FBgn0016726	-0.190532	0.999887
FBgn0016754	0.180887	0.999887
FBgn0016756	0.128191	0.999887
FBgn0016762	-0.143655	0.999887
FBgn0016794	0.383618	0.999887
FBgn0016797	0.187278	0.999887
FBgn0016917	0.0847666	0.999887
FBgn0016920	-0.132099	0.999887
FBgn0016926	-0.0835099	0.999887
FBgn0016930	0.00545413	0.999887
FBgn0016970	0.150787	0.999887
FBgn0016974	0.0374945	0.999887
FBgn0016977	0.162548	0.999887
FBgn0016978	0.0885904	0.999887
FBgn0016983	0.26495	0.999887
FBgn0016984	-0.0214349	0.999887
FBgn0017414	-0.0814783	0.999887
FBgn0017418	-0.0134348	0.999887
FBgn0017429	-0.0859723	0.999887
FBgn0017430	0.00854144	0.999887
FBgn0017448	-0.0378371	0.999887
FBgn0017456	-0.0524514	0.999887
FBgn0017457	-0.0614567	0.999887
FBgn0017482	-0.0870182	0.999887
FBgn0017545	0.0773834	0.999887
FBgn0017550	0.340164	0.999887
FBgn0017551	0.115069	0.999887
FBgn0017558	0.150711	0.999887
FBgn0017561	-0.215897	0.999887
FBgn0017566	0.106415	0.999887
FBgn0017567	0.0645343	0.999887
FBgn0017572	-0.00108348	0.999887
FBgn0017577	0.115449	0.999887
FBgn0017578	-0.0492724	0.999887
FBgn0017579	-0.135047	0.999887
FBgn0017581	0.145388	0.999887
FBgn0017590	-0.043514	0.999887
FBgn0019624	-0.119504	0.999887
FBgn0019637	0.149869	0.999887
FBgn0019643	-0.0830978	0.999887
FBgn0019644	-0.243218	0.999887
FBgn0019650	0.0486784	0.999887
FBgn0019660	0.0877347	0.999887
FBgn0019661	0.16602	0.999887
FBgn0019662	0.20979	0.999887
FBgn0019686	-0.235374	0.999887
FBgn0019828	0.0106165	0.999887
FBgn0019830	-0.215958	0.999887
FBgn0019890	0.160604	0.999887
FBgn0019925	-0.00828908	0.999887
FBgn0019928	0.165413	0.999887
FBgn0019929	0.0884467	0.999887
FBgn0019932	0.0081775	0.999887
FBgn0019936	-0.125613	0.999887
FBgn0019938	0.00409444	0.999887
FBgn0019940	-0.188664	0.999887
FBgn0019947	0.170695	0.999887
FBgn0019949	-0.0236221	0.999887
FBgn0019952	-0.0471695	0.999887
FBgn0019957	-0.00250363	0.999887
FBgn0019960	-0.0448521	0.999887
FBgn0019968	0.481269	0.999887
FBgn0019972	0.070283	0.999887
FBgn0019982	-0.29047	0.999887
FBgn0019985	0.0200695	0.999887
FBgn0019990	0.386916	0.999887
FBgn0020018	-0.0598519	0.999887
FBgn0020224	-0.106033	0.999887
FBgn0020235	-0.0363254	0.999887
FBgn0020236	0.0249029	0.999887
FBgn0020238	0.12054	0.999887
FBgn0020249	0.278733	0.999887
FBgn0020251	-0.149314	0.999887
FBgn0020255	0.00464651	0.999887
FBgn0020257	0.246064	0.999887
FBgn0020261	0.310871	0.999887
FBgn0020269	0.0129529	0.999887
FBgn0020270	-0.132855	0.999887
FBgn0020272	-0.209623	0.999887
FBgn0020278	0.181137	0.999887
FBgn0020279	0.310249	0.999887
FBgn0020294	0.0202364	0.999887
FBgn0020299	0.0402657	0.999887
FBgn0020300	0.0497152	0.999887
FBgn0020304	0.116631	0.999887
FBgn0020305	-0.29182	0.999887
FBgn0020307	-0.00558194	0.999887
FBgn0020309	0.101281	0.999887
FBgn0020312	-0.104782	0.999887
FBgn0020369	0.019029	0.999887
FBgn0020370	0.374906	0.999887
FBgn0020371	0.0730827	0.999887
FBgn0020372	0.0607646	0.999887
FBgn0020378	0.0764559	0.999887
FBgn0020379	0.0706413	0.999887
FBgn0020381	-0.119233	0.999887
FBgn0020385	0.405276	0.999887
FBgn0020386	0.259089	0.999887
FBgn0020388	-0.0355839	0.999887
FBgn0020389	0.393785	0.999887
FBgn0020391	0.056503	0.999887
FBgn0020392	-0.356928	0.999887
FBgn0020407	0.0612962	0.999887
FBgn0020412	0.151718	0.999887
FBgn0020414	0.0670921	0.999887
FBgn0020415	-0.0859114	0.999887
FBgn0020416	-0.0893061	0.999887
FBgn0020440	-0.0106097	0.999887
FBgn0020443	0.120797	0.999887
FBgn0020445	0.197416	0.999887
FBgn0020493	-0.147054	0.999887
FBgn0020496	-0.109227	0.999887
FBgn0020497	0.225464	0.999887
FBgn0020503	-0.158737	0.999887
FBgn0020508	-0.0759431	0.999887
FBgn0020509	0.102815	0.999887
FBgn0020510	-0.00126357	0.999887
FBgn0020513	-0.104717	0.999887
FBgn0020521	0.100274	0.999887
FBgn0020545	-0.189265	0.999887
FBgn0020546	0.0987145	0.999887
FBgn0020556	0.265623	0.999887
FBgn0020616	0.00942148	0.999887
FBgn0020620	0.105699	0.999887
FBgn0020621	0.140083	0.999887
FBgn0020622	0.0614909	0.999887
FBgn0020626	0.123959	0.999887
FBgn0020633	0.217272	0.999887
FBgn0020637	-0.14174	0.999887
FBgn0020639	-0.265854	0.999887
FBgn0020642	-0.153893	0.999887
FBgn0020647	-0.108029	0.999887
FBgn0020653	-0.169856	0.999887
FBgn0020655	0.00103423	0.999887
FBgn0020762	-0.091783	0.999887
FBgn0020764	-0.186285	0.999887
FBgn0020765	-0.0249554	0.999887
FBgn0020767	0.0023992	0.999887
FBgn0020880	-0.0489619	0.999887
FBgn0020887	-0.114098	0.999887
FBgn0020906	-0.146233	0.999887
FBgn0020907	-0.0946134	0.999887
FBgn0020908	0.0381545	0.999887
FBgn0020909	0.115257	0.999887
FBgn0020910	-0.0812765	0.999887
FBgn0020912	0.0105859	0.999887
FBgn0020930	-0.14029	0.999887
FBgn0021738	0.048431	0.999887
FBgn0021750	-0.100204	0.999887
FBgn0021760	0.127068	0.999887
FBgn0021761	0.320848	0.999887
FBgn0021764	0.172279	0.999887
FBgn0021765	-0.249503	0.999887
FBgn0021767	-0.0115536	0.999887
FBgn0021768	0.0835038	0.999887
FBgn0021795	-0.37378	0.999887
FBgn0021796	0.392815	0.999887
FBgn0021800	-0.211581	0.999887
FBgn0021814	0.0334981	0.999887
FBgn0021818	0.0912885	0.999887
FBgn0021825	0.322752	0.999887
FBgn0021847	-0.185181	0.999887
FBgn0021856	0.176465	0.999887
FBgn0021872	0.02387	0.999887
FBgn0021874	-0.0743386	0.999887
FBgn0021875	0.0361893	0.999887
FBgn0021895	0.137985	0.999887
FBgn0021906	-0.297075	0.999887
FBgn0021944	-0.423429	0.999887
FBgn0021967	-0.337911	0.999887
FBgn0021979	0.1023	0.999887
FBgn0021995	-0.239753	0.999887
FBgn0022023	-0.0549456	0.999887
FBgn0022027	-0.082621	0.999887
FBgn0022029	0.15748	0.999887
FBgn0022069	-0.0625841	0.999887
FBgn0022097	-0.11848	0.999887
FBgn0022153	-0.0113215	0.999887
FBgn0022160	-0.199444	0.999887
FBgn0022213	0.182605	0.999887
FBgn0022224	0.0181158	0.999887
FBgn0022238	0.103346	0.999887
FBgn0022288	-0.00867779	0.999887
FBgn0022338	0.108187	0.999887
FBgn0022343	-0.206348	0.999887
FBgn0022344	-0.0795354	0.999887
FBgn0022349	0.153666	0.999887
FBgn0022355	0.0113986	0.999887
FBgn0022359	0.0042718	0.999887
FBgn0022361	-0.140241	0.999887
FBgn0022382	-0.0783067	0.999887
FBgn0022699	-0.0111003	0.999887
FBgn0022700	-0.164483	0.999887
FBgn0022702	-0.364055	0.999887
FBgn0022709	-0.131157	0.999887
FBgn0022710	-0.0468002	0.999887
FBgn0022724	0.0875654	0.999887
FBgn0022740	-0.0779192	0.999887
FBgn0022764	0.123027	0.999887
FBgn0022768	0.231675	0.999887
FBgn0022770	-0.144479	0.999887
FBgn0022772	-0.0704155	0.999887
FBgn0022774	-0.20154	0.999887
FBgn0022786	0.168809	0.999887
FBgn0022787	-0.0552061	0.999887
FBgn0022800	0.0313153	0.999887
FBgn0022893	0.0616027	0.999887
FBgn0022935	-0.139339	0.999887
FBgn0022936	-0.047021	0.999887
FBgn0022942	0.363485	0.999887
FBgn0022943	-0.0589351	0.999887
FBgn0022959	0.13012	0.999887
FBgn0022981	-0.067228	0.999887
FBgn0022984	0.186195	0.999887
FBgn0022985	0.0178119	0.999887
FBgn0022986	0.275074	0.999887
FBgn0022987	0.209444	0.999887
FBgn0023000	0.242924	0.999887
FBgn0023001	0.0200394	0.999887
FBgn0023023	-0.011548	0.999887
FBgn0023076	0.0801409	0.999887
FBgn0023081	0.144087	0.999887
FBgn0023083	-0.016659	0.999887
FBgn0023090	0.0132993	0.999887
FBgn0023094	-0.242754	0.999887
FBgn0023095	0.0455081	0.999887
FBgn0023097	0.211062	0.999887
FBgn0023129	0.0206088	0.999887
FBgn0023130	0.28635	0.999887
FBgn0023143	-0.095984	0.999887
FBgn0023167	-0.0034985	0.999887
FBgn0023169	0.0114753	0.999887
FBgn0023171	0.192556	0.999887
FBgn0023172	0.214468	0.999887
FBgn0023174	-0.0794575	0.999887
FBgn0023175	-0.23224	0.999887
FBgn0023177	0.302445	0.999887
FBgn0023178	0.0438991	0.999887
[truncated: 15,423 more rows]

## Sheet: B. dl WT vs dl WT_Df
Gene	log2FoldChange	adjusted p-value
FBgn0035208	-3.10928	3.08e-27
FBgn0013755	-2.71626	6.12e-21
FBgn0027527	-2.46714	1.96e-16
FBgn0083973	-2.31293	1.2e-15
FBgn0035569	-2.13539	6.71e-14
FBgn0004143	-2.26367	6.74e-14
FBgn0001174	-2.1031	1.14e-13
FBgn0000227	-2.13127	1.17e-13
FBgn0046776	-1.89648	4.87e-11
FBgn0038566	-1.99366	6.51e-11
FBgn0085243	-1.95734	7.95e-11
FBgn0031393	-1.98303	2e-10
FBgn0042199	-1.91058	1.63e-09
FBgn0031621	-1.80854	8.36e-09
FBgn0004389	-1.71736	1.38e-08
FBgn0010602	1.28761	1.44e-08
FBgn0005590	-1.82126	1.79e-08
FBgn0031718	-1.76057	4.18e-08
FBgn0035287	1.70734	2.48e-07
FBgn0003683	-1.6733	3e-07
FBgn0033275	-1.65758	5.84e-07
FBgn0003270	-1.60337	2.23e-06
FBgn0035572	-1.52038	8.25e-06
FBgn0030807	-1.53665	8.26e-06
FBgn0033381	1.5242	1.04e-05
FBgn0035621	-1.45623	1.75e-05
FBgn0035735	-1.45113	2.1e-05
FBgn0004052	-1.45928	3.4e-05
FBgn0031719	-1.36233	9.75e-05
FBgn0001256	-1.2696	0.000280073
FBgn0264495	0.864565	0.000564982
FBgn0031288	1.21414	0.000577274
FBgn0034788	1.20609	0.000624758
FBgn0040279	-1.22258	0.000695801
FBgn0037992	-1.2315	0.00113645
FBgn0004169	-1.0521	0.00149333
FBgn0036199	1.09082	0.00173987
FBgn0035547	-1.18143	0.00205928
FBgn0031097	-1.15154	0.00259857
FBgn0033740	1.15874	0.00464021
FBgn0001085	0.990061	0.00468562
FBgn0002773	-0.916751	0.00499349
FBgn0031629	-1.11541	0.00929952
FBgn0036810	-1.07628	0.00984167
FBgn0039214	0.815657	0.0108678
FBgn0020306	0.826122	0.0115475
FBgn0011768	-0.745096	0.0125404
FBgn0042174	-0.766559	0.0130457
FBgn0040813	-0.854172	0.0135727
FBgn0003415	0.785465	0.0138629
FBgn0259209	-0.928283	0.014711
FBgn0003277	0.886544	0.0148249
FBgn0026575	0.745328	0.0148249
FBgn0029931	-1.05853	0.0148249
FBgn0052625	-0.859731	0.0149838
FBgn0014417	0.92228	0.0168693
FBgn0004053	-1.01511	0.0177119
FBgn0031820	0.83047	0.0177119
FBgn0020415	0.925639	0.0250001
FBgn0003444	0.853444	0.0365398
FBgn0028953	0.661717	0.0374662
FBgn0086908	0.754418	0.0374662
FBgn0010423	-1.00293	0.0383012
FBgn0036352	-0.848889	0.0387163
FBgn0050413	-0.901327	0.0390672
FBgn0085295	-0.962581	0.0394814
FBgn0036594	-0.876158	0.0416869
FBgn0010926	0.722684	0.0431734
FBgn0029681	-0.833448	0.0431734
FBgn0000100	-0.65435	0.0444671
FBgn0038017	-0.944381	0.0444671
FBgn0052581	0.898549	0.0444671
FBgn0030373	-0.941672	0.0473733
FBgn0028408	0.669959	0.0478757
FBgn0025641	0.778822	0.048773
FBgn0015805	0.740055	0.0615861
FBgn0025382	-0.909641	0.0715877
FBgn0033942	-0.933837	0.0715877
FBgn0022764	0.643242	0.0779231
FBgn0262104	-0.865566	0.0794888
FBgn0264695	-0.804037	0.0814935
FBgn0015625	0.629378	0.0826192
FBgn0261710	0.660972	0.0826192
FBgn0267795	-0.704187	0.0826192
FBgn0266101	0.729715	0.0881799
FBgn0086558	0.55874	0.0892509
FBgn0031971	0.683382	0.0897602
FBgn0033799	-0.886789	0.0981088
FBgn0050085	0.867593	0.0981088
FBgn0014469	0.805061	0.0992263
FBgn0031908	-0.88513	0.10201
FBgn0031062	0.825016	0.103996
FBgn0266557	0.61105	0.105435
FBgn0037224	-0.837759	0.113461
FBgn0035348	-0.88381	0.122867
FBgn0040890	-0.768487	0.122867
FBgn0259212	0.703591	0.122867
FBgn0011230	0.752497	0.125503
FBgn0035983	0.664606	0.130251
FBgn0039302	0.605828	0.133012
FBgn0033378	0.596389	0.136145
FBgn0004598	0.706856	0.139598
FBgn0010905	0.573373	0.142241
FBgn0000405	0.66329	0.142868
FBgn0010660	0.703898	0.144397
FBgn0025639	0.650363	0.144397
FBgn0016070	0.542406	0.148424
FBgn0261954	0.554398	0.150143
FBgn0035063	0.69327	0.152394
FBgn0020370	0.602947	0.153353
FBgn0029903	0.67914	0.159148
FBgn0037913	-0.571151	0.165996
FBgn0032748	0.627733	0.172034
FBgn0039227	0.617992	0.173301
FBgn0011642	0.665933	0.173732
FBgn0031663	-0.64973	0.185476
FBgn0035513	-0.752756	0.185476
FBgn0267910	-0.670661	0.189115
FBgn0026597	0.640244	0.19034
FBgn0263995	-0.776271	0.196656
FBgn0250848	-0.522013	0.200866
FBgn0005694	0.614322	0.20174
FBgn0011785	0.688715	0.211724
FBgn0000140	0.687716	0.212828
FBgn0027783	0.59772	0.212828
FBgn0028343	0.539651	0.212828
FBgn0031759	0.587362	0.212828
FBgn0034201	-0.739749	0.212828
FBgn0082831	0.708848	0.212828
FBgn0086655	0.713144	0.212953
FBgn0028982	0.638519	0.214077
FBgn0051626	-0.743012	0.217212
FBgn0001320	-0.806574	0.21771
FBgn0001986	0.643892	0.21771
FBgn0033979	-0.719801	0.21771
FBgn0036607	-0.657687	0.21771
FBgn0037430	-0.70683	0.21771
FBgn0086690	0.729038	0.21771
FBgn0261618	0.540275	0.21771
FBgn0264785	0.613745	0.21771
FBgn0267390	0.685325	0.21771
FBgn0033352	0.620951	0.22276
FBgn0035388	0.647089	0.22276
FBgn0038487	-0.687307	0.22382
FBgn0003274	-0.509005	0.223899
FBgn0036592	-0.701758	0.225201
FBgn0260780	0.539703	0.227746
FBgn0266347	0.774724	0.227746
FBgn0010575	0.58098	0.228467
FBgn0003900	-0.762985	0.229433
FBgn0043854	-0.658101	0.229433
FBgn0000451	-0.778288	0.230913
FBgn0004179	0.587777	0.230913
FBgn0004777	-0.735232	0.230913
FBgn0033367	-0.742383	0.230913
FBgn0036111	0.54981	0.230913
FBgn0034962	0.540442	0.238807
FBgn0029093	-0.52794	0.239923
FBgn0002431	0.641041	0.241168
FBgn0003285	0.699321	0.241168
FBgn0029867	0.608962	0.241168
FBgn0038339	-0.615994	0.241168
FBgn0261885	0.602971	0.241168
FBgn0034975	0.635525	0.241916
FBgn0266916	0.655005	0.241916
FBgn0010282	0.516812	0.243555
FBgn0023170	-0.53845	0.243555
FBgn0027603	0.618647	0.243555
FBgn0259789	0.548533	0.243643
FBgn0022238	0.530262	0.244138
FBgn0033236	0.64486	0.244138
FBgn0030680	0.588341	0.245783
FBgn0033631	-0.506441	0.248161
FBgn0034468	-0.683692	0.248161
FBgn0058469	-0.600326	0.248161
FBgn0027499	0.605818	0.248285
FBgn0032453	-0.53727	0.248285
FBgn0261283	-0.603342	0.248285
FBgn0003612	0.546237	0.248672
FBgn0033658	-0.599971	0.250504
FBgn0036365	0.728583	0.250504
FBgn0051813	-0.625365	0.250504
FBgn0040842	-0.690413	0.258804
FBgn0037327	0.595882	0.260402
FBgn0262473	0.693827	0.260402
FBgn0267826	-0.756913	0.260402
FBgn0004228	-0.598801	0.26202
FBgn0004401	0.514047	0.26202
FBgn0283724	0.618491	0.263459
FBgn0000414	0.697652	0.269577
FBgn0014189	0.515647	0.269577
FBgn0015903	0.623499	0.269577
FBgn0023518	0.66931	0.269577
FBgn0027949	0.525076	0.269577
FBgn0030293	0.592709	0.269577
FBgn0030390	-0.620896	0.269577
FBgn0031947	0.505831	0.269577
FBgn0034249	0.694645	0.269577
FBgn0035111	0.636497	0.269577
FBgn0035257	-0.726977	0.269577
FBgn0035742	-0.658755	0.269577
FBgn0037428	-0.623049	0.269577
FBgn0043900	0.61673	0.269577
FBgn0052207	-0.580055	0.269577
FBgn0052453	-0.605791	0.269577
FBgn0053977	-0.556529	0.269577
FBgn0283657	0.503407	0.269577
FBgn0024294	-0.636846	0.270814
FBgn0086362	0.719965	0.270814
FBgn0027495	0.592649	0.271798
FBgn0042085	0.618087	0.272204
FBgn0011692	0.605388	0.274563
FBgn0032341	0.648384	0.278459
FBgn0259785	0.522663	0.278459
FBgn0003716	0.745557	0.283454
FBgn0035859	-0.613377	0.284712
FBgn0034245	-0.521311	0.286415
FBgn0001169	0.618628	0.287851
FBgn0036349	-0.68622	0.287851
FBgn0039972	0.543062	0.287851
FBgn0004237	0.52057	0.301994
FBgn0260653	-0.648088	0.303482
FBgn0003520	0.52351	0.315751
FBgn0022960	0.719386	0.315751
FBgn0030054	0.47885	0.315751
FBgn0030093	0.531917	0.315751
FBgn0030759	-0.671059	0.315751
FBgn0032068	-0.612487	0.315751
FBgn0033917	0.636516	0.315751
FBgn0036780	-0.554309	0.315751
FBgn0037924	0.650047	0.315751
FBgn0038610	-0.655277	0.315751
FBgn0250814	-0.532159	0.315751
FBgn0260789	0.619378	0.315751
FBgn0005624	0.609699	0.322482
FBgn0030350	-0.550506	0.323991
FBgn0263933	0.551988	0.323991
FBgn0021764	0.642097	0.328883
FBgn0034300	0.65563	0.328883
FBgn0027558	0.619103	0.331198
FBgn0001215	0.486381	0.331894
FBgn0004170	-0.649885	0.331894
FBgn0010300	0.513089	0.331894
FBgn0010825	0.502981	0.331894
FBgn0013756	0.525365	0.331894
FBgn0024285	0.517407	0.331894
FBgn0033062	0.474455	0.331894
FBgn0033802	0.693493	0.331894
FBgn0050373	-0.605142	0.331894
FBgn0085245	0.708321	0.331894
FBgn0039633	0.614518	0.333396
FBgn0024330	0.631441	0.338031
FBgn0266580	0.605871	0.338969
FBgn0035370	0.523038	0.339567
FBgn0033814	0.557542	0.341321
FBgn0037655	0.639643	0.341321
FBgn0003268	0.588064	0.345419
FBgn0266582	-0.494246	0.345419
FBgn0031030	0.474477	0.345944
FBgn0036624	0.679606	0.346086
FBgn0086904	-0.48791	0.346086
FBgn0003720	-0.620976	0.348254
FBgn0014007	0.652158	0.351999
FBgn0037356	-0.610889	0.351999
FBgn0040529	-0.481909	0.351999
FBgn0040798	-0.59392	0.351999
FBgn0026375	0.544014	0.354295
FBgn0062928	-0.533233	0.35735
FBgn0004875	0.529172	0.358283
FBgn0033581	0.518229	0.358283
FBgn0003087	0.554421	0.359985
FBgn0039149	-0.681969	0.361815
FBgn0037344	0.471388	0.364383
FBgn0000017	0.595039	0.365121
FBgn0032521	0.646403	0.365121
FBgn0002781	0.500867	0.365818
FBgn0039861	0.638666	0.367973
FBgn0000412	0.45572	0.371426
FBgn0025874	0.567018	0.375028
FBgn0035252	-0.488146	0.377548
FBgn0005617	0.518317	0.378137
FBgn0267790	0.504637	0.385
FBgn0000299	-0.691441	0.385933
FBgn0260632	-0.544836	0.390566
FBgn0003719	-0.606099	0.398706
FBgn0004087	-0.598521	0.398706
FBgn0030973	0.502353	0.400216
FBgn0263847	-0.685616	0.400216
FBgn0000810	0.620162	0.403038
FBgn0003882	0.605553	0.403038
FBgn0004629	-0.550699	0.403038
FBgn0014865	-0.5817	0.403038
FBgn0015789	0.481101	0.403038
FBgn0016032	-0.504907	0.403038
FBgn0032335	-0.598402	0.403038
FBgn0034878	0.482832	0.403038
FBgn0035285	0.511167	0.403038
FBgn0035685	-0.516964	0.403038
FBgn0038108	0.492977	0.403038
FBgn0261509	-0.516964	0.403038
FBgn0026433	0.550519	0.405258
FBgn0040398	-0.63222	0.405258
FBgn0010113	0.493414	0.405301
FBgn0028327	0.539374	0.405301
FBgn0033663	0.416385	0.405301
FBgn0262527	0.467284	0.406787
FBgn0045035	0.654135	0.408012
FBgn0039936	0.445723	0.409563
FBgn0262733	0.516212	0.411298
FBgn0000307	0.517574	0.413786
FBgn0004956	-0.57529	0.413786
FBgn0020660	0.658546	0.413786
FBgn0029088	0.6046	0.413786
FBgn0033261	-0.562412	0.413786
FBgn0035856	-0.558781	0.413786
FBgn0062978	-0.635149	0.415436
FBgn0024987	0.540792	0.423661
FBgn0034664	-0.562653	0.423661
FBgn0040799	-0.565385	0.423661
FBgn0262116	-0.409323	0.423661
FBgn0001150	-0.643556	0.423712
FBgn0029736	0.623674	0.423712
FBgn0031176	-0.565226	0.423712
FBgn0033903	-0.645946	0.423712
FBgn0041171	0.48089	0.423712
FBgn0043791	-0.591445	0.423712
FBgn0000376	0.52465	0.429381
FBgn0034645	-0.458475	0.42961
FBgn0033155	0.516325	0.430343
FBgn0051648	-0.637936	0.430493
FBgn0036606	-0.51618	0.433074
FBgn0039802	-0.49335	0.43421
FBgn0022893	0.44846	0.436115
FBgn0030269	0.516944	0.436115
FBgn0031034	-0.535139	0.436115
FBgn0039554	0.543979	0.436115
FBgn0260955	-0.459564	0.436115
FBgn0265523	0.422086	0.436145
FBgn0260794	0.53604	0.436991
FBgn0032208	0.460622	0.437144
FBgn0041188	0.521259	0.437144
FBgn0002924	0.483954	0.438767
FBgn0003028	0.474371	0.438767
FBgn0003598	0.482076	0.438767
FBgn0015477	0.618269	0.438767
FBgn0020300	-0.625689	0.438767
FBgn0023130	0.625545	0.438767
FBgn0024921	0.43722	0.438767
FBgn0031698	0.498785	0.438767
FBgn0031737	-0.590212	0.438767
FBgn0035089	-0.655596	0.438767
FBgn0035570	-0.536076	0.438767
FBgn0037137	0.476315	0.438767
FBgn0037225	-0.491647	0.438767
FBgn0050440	0.632781	0.438767
FBgn0050458	-0.521578	0.438767
FBgn0085813	-0.545266	0.438767
FBgn0032876	0.573203	0.43959
FBgn0010388	-0.582856	0.443337
FBgn0031895	0.540467	0.443337
FBgn0036791	-0.618294	0.443337
FBgn0037109	0.524347	0.443337
FBgn0010328	0.438442	0.443661
FBgn0033480	-0.477675	0.443661
FBgn0037834	0.439172	0.443661
FBgn0259984	0.515186	0.443661
FBgn0264959	0.586365	0.444236
FBgn0036043	0.469411	0.444508
FBgn0000078	-0.553158	0.44515
FBgn0052133	0.605058	0.446407
FBgn0261830	-0.601391	0.446407
FBgn0263707	-0.581695	0.446407
FBgn0031033	-0.596083	0.448126
FBgn0034060	0.496518	0.448361
FBgn0016054	0.598848	0.450289
FBgn0036733	0.518415	0.45189
FBgn0001077	-0.585249	0.452312
FBgn0002183	0.478274	0.452312
FBgn0027506	0.500943	0.452312
FBgn0027600	-0.4615	0.452312
FBgn0030569	-0.609334	0.452312
FBgn0033021	0.575495	0.452312
FBgn0034271	0.514475	0.452312
FBgn0036351	-0.460618	0.452312
FBgn0044823	0.569127	0.452312
FBgn0261524	0.547299	0.452312
FBgn0001168	-0.536852	0.457368
FBgn0030710	0.586432	0.457667
FBgn0032479	0.494611	0.457667
FBgn0033590	-0.537368	0.457667
FBgn0035107	0.46638	0.457667
FBgn0039055	0.572245	0.457667
FBgn0039186	0.549923	0.457667
FBgn0052767	0.454629	0.457667
FBgn0283521	0.417834	0.457667
FBgn0036824	-0.541819	0.458751
FBgn0000046	-0.639574	0.459374
FBgn0035121	0.422149	0.460778
FBgn0036870	-0.43273	0.464008
FBgn0038277	-0.390615	0.466892
FBgn0003495	0.493603	0.469037
FBgn0004781	-0.48217	0.469037
FBgn0012034	-0.519917	0.469037
FBgn0013732	0.531372	0.469037
FBgn0014127	0.515285	0.469037
FBgn0025388	0.596407	0.469037
FBgn0025720	0.495059	0.469037
FBgn0025807	0.539019	0.469037
FBgn0030121	0.568665	0.469037
FBgn0030658	0.433564	0.469037
FBgn0030777	-0.550778	0.469037
FBgn0031052	0.542259	0.469037
FBgn0033897	0.480934	0.469037
FBgn0033978	-0.584996	0.469037
FBgn0036952	-0.632264	0.469037
FBgn0037473	-0.619182	0.469037
FBgn0039930	-0.505512	0.469037
FBgn0262955	0.462096	0.469037
FBgn0262976	0.59404	0.469037
FBgn0261113	-0.492007	0.47048
FBgn0003137	-0.57518	0.471407
FBgn0004698	0.480031	0.471469
FBgn0030486	0.492751	0.471469
FBgn0086711	0.463576	0.471469
FBgn0259139	0.497291	0.471469
FBgn0000719	0.536872	0.474425
FBgn0001254	-0.568968	0.474425
FBgn0004362	0.411447	0.474425
FBgn0020279	0.461628	0.474425
FBgn0031659	0.54996	0.474425
FBgn0034763	0.45897	0.474425
FBgn0036600	-0.512816	0.474425
FBgn0037386	-0.615004	0.474425
FBgn0037416	-0.460052	0.474425
FBgn0038419	-0.574818	0.474425
FBgn0027548	0.551727	0.476219
FBgn0034295	-0.475835	0.482223
FBgn0029957	0.579375	0.482226
FBgn0039229	0.399597	0.484192
FBgn0019637	0.457504	0.485111
FBgn0038551	0.471361	0.485111
FBgn0043903	0.46715	0.485111
FBgn0003321	0.531133	0.485816
FBgn0026149	0.57232	0.486666
FBgn0031548	-0.494967	0.486666
FBgn0032651	-0.456855	0.486666
FBgn0033845	0.498321	0.486666
FBgn0036112	-0.414427	0.486666
FBgn0040232	0.545856	0.486666
FBgn0262519	0.413845	0.486666
FBgn0002121	-0.483244	0.487437
FBgn0002780	0.527422	0.487437
FBgn0004419	0.376314	0.487437
FBgn0004654	-0.45461	0.487437
FBgn0014877	-0.476716	0.487437
FBgn0053087	0.620295	0.487437
FBgn0004117	-0.601792	0.487754
FBgn0010453	-0.531564	0.487754
FBgn0032363	0.55734	0.489087
FBgn0035106	0.534765	0.489087
FBgn0037491	0.521707	0.489087
FBgn0039558	0.513013	0.489087
FBgn0038252	0.400549	0.490736
FBgn0040234	0.611908	0.492565
FBgn0262699	0.511498	0.492565
FBgn0021944	-0.513041	0.494022
FBgn0036382	-0.407855	0.494022
FBgn0050457	-0.517952	0.494022
FBgn0000463	0.521389	0.494115
FBgn0027532	0.513023	0.494115
FBgn0011227	-0.426743	0.494263
FBgn0030187	-0.567748	0.494263
FBgn0036605	-0.493788	0.494263
FBgn0042134	0.427116	0.494263
FBgn0261573	0.458478	0.494263
FBgn0016075	-0.599304	0.49576
FBgn0031078	0.481735	0.49576
FBgn0035667	-0.504557	0.49576
FBgn0259978	0.499899	0.49576
FBgn0260484	-0.495506	0.49576
FBgn0032897	-0.589706	0.496513
FBgn0033138	-0.551837	0.496513
FBgn0036091	-0.554422	0.496513
FBgn0047038	-0.455558	0.496513
FBgn0036735	0.515573	0.497404
FBgn0029113	0.429437	0.497918
FBgn0264479	-0.555542	0.497918
FBgn0024291	0.461658	0.500255
FBgn0086356	0.413918	0.501319
FBgn0003165	0.430117	0.505658
FBgn0004396	-0.494002	0.505658
FBgn0015522	-0.495211	0.505658
FBgn0026533	0.453943	0.505658
FBgn0030049	0.426391	0.505658
FBgn0034240	0.445613	0.505658
FBgn0037051	0.441325	0.505658
FBgn0038647	-0.57125	0.505658
FBgn0039051	-0.555776	0.505658
FBgn0052243	0.509482	0.505658
FBgn0004867	-0.360445	0.507041
FBgn0011604	0.440906	0.507041
FBgn0027490	0.464725	0.507041
FBgn0038407	-0.5889	0.507041
FBgn0261647	0.487736	0.507041
FBgn0030507	0.588548	0.507308
FBgn0263911	-0.416105	0.509521
FBgn0053774	-0.432697	0.511576
FBgn0033789	-0.480305	0.512784
FBgn0003888	-0.581795	0.514674
FBgn0004054	-0.414566	0.514674
FBgn0029969	-0.460259	0.514674
FBgn0031377	0.504247	0.514674
FBgn0036374	0.558333	0.514674
FBgn0036574	0.463667	0.514674
FBgn0039908	-0.588272	0.514674
FBgn0040010	0.469205	0.514674
FBgn0262614	0.496206	0.514674
FBgn0027296	0.521118	0.517447
FBgn0034723	-0.58793	0.517995
FBgn0039777	-0.480972	0.517995
FBgn0260749	0.49229	0.517995
FBgn0045063	0.565511	0.518094
FBgn0040653	-0.524156	0.519252
FBgn0039338	0.501153	0.519299
FBgn0028550	-0.544631	0.520091
FBgn0052016	0.559522	0.520091
FBgn0000283	0.463461	0.521322
FBgn0002914	0.45708	0.521942
FBgn0034145	-0.543436	0.521942
FBgn0035103	-0.491644	0.521942
FBgn0037935	-0.586536	0.521942
FBgn0087008	0.3964	0.521942
FBgn0027057	0.481244	0.523468
FBgn0050122	0.452483	0.523468
FBgn0063497	-0.524918	0.523808
FBgn0058263	-0.503713	0.524434
FBgn0030067	0.492072	0.524664
FBgn0032299	-0.468321	0.524664
FBgn0032435	-0.535336	0.524664
FBgn0032656	0.532336	0.524664
FBgn0037470	0.432855	0.524664
FBgn0039091	-0.506513	0.524664
FBgn0085451	0.515123	0.524664
FBgn0037918	0.540906	0.525151
FBgn0035720	0.422189	0.527431
FBgn0051998	0.564054	0.527431
FBgn0035437	0.552257	0.527869
FBgn0004647	0.449902	0.528827
FBgn0036514	0.459565	0.528827
FBgn0051004	-0.481603	0.529193
FBgn0086694	0.43064	0.529193
FBgn0032105	0.42934	0.530919
FBgn0034229	-0.570346	0.530919
FBgn0052570	-0.447588	0.530919
FBgn0261552	-0.440687	0.532046
FBgn0000117	0.40693	0.534312
FBgn0000239	0.488667	0.535391
FBgn0032467	0.459083	0.535391
FBgn0036467	-0.462165	0.535391
FBgn0052654	0.551647	0.536807
FBgn0035541	-0.406563	0.537096
FBgn0001234	-0.49277	0.537151
FBgn0010424	-0.586419	0.537151
FBgn0029676	0.443607	0.537151
FBgn0039760	-0.564048	0.537151
FBgn0267351	0.499895	0.537151
FBgn0003149	-0.585871	0.537407
FBgn0034647	-0.525476	0.538014
FBgn0036980	0.437684	0.54066
FBgn0001145	-0.457152	0.540889
FBgn0004864	0.492452	0.540889
FBgn0010315	0.485234	0.540889
FBgn0011206	-0.566546	0.540889
FBgn0014037	0.384836	0.540889
FBgn0014340	0.56158	0.540889
FBgn0014879	0.404866	0.540889
FBgn0021761	0.437619	0.540889
FBgn0026252	0.385644	0.540889
FBgn0027620	0.404359	0.540889
FBgn0029157	0.433167	0.540889
FBgn0030099	-0.568334	0.540889
FBgn0030551	-0.374347	0.540889
FBgn0032075	-0.471144	0.540889
FBgn0036024	-0.472719	0.540889
FBgn0036621	0.497089	0.540889
FBgn0037797	-0.560628	0.540889
FBgn0037850	-0.576646	0.540889
FBgn0038135	-0.495959	0.540889
FBgn0038535	0.412325	0.540889
FBgn0038740	-0.497333	0.540889
FBgn0040230	0.454679	0.540889
FBgn0046875	-0.451427	0.540889
FBgn0052364	0.476955	0.540889
FBgn0052365	0.538953	0.540889
FBgn0053126	-0.548938	0.540889
FBgn0086350	0.543218	0.540889
FBgn0259168	0.410427	0.540889
FBgn0261268	0.44211	0.540889
FBgn0261560	-0.470864	0.540889
FBgn0261673	-0.576388	0.540889
FBgn0263855	0.54004	0.540889
FBgn0265180	-0.579266	0.540889
FBgn0265697	-0.472482	0.540889
FBgn0266417	-0.579755	0.540889
FBgn0267911	-0.572334	0.540889
FBgn0284220	0.401471	0.540889
FBgn0034893	-0.490678	0.541073
FBgn0003656	0.427804	0.541429
FBgn0040752	0.394539	0.54454
FBgn0033475	-0.42264	0.54537
FBgn0262007	-0.480383	0.54537
FBgn0265487	-0.491686	0.54537
FBgn0262719	-0.563	0.545696
FBgn0034521	0.478878	0.545946
FBgn0036522	0.491202	0.545946
FBgn0040809	-0.55527	0.545946
FBgn0050020	0.504471	0.545946
FBgn0020497	0.38672	0.547152
FBgn0015391	0.405897	0.55055
FBgn0016983	0.46562	0.55055
FBgn0023177	0.434849	0.55055
FBgn0025637	0.35426	0.55055
FBgn0027574	0.508613	0.55055
FBgn0029925	-0.479688	0.55055
FBgn0030347	-0.532825	0.55055
FBgn0031263	-0.418645	0.55055
FBgn0032940	0.43353	0.55055
FBgn0033188	-0.46524	0.55055
FBgn0034277	0.40837	0.55055
FBgn0034296	-0.468444	0.55055
FBgn0036710	0.411891	0.55055
FBgn0037372	0.497867	0.55055
FBgn0037944	0.526657	0.55055
FBgn0261004	0.494761	0.55055
FBgn0261617	0.432389	0.55055
FBgn0261641	0.44742	0.55055
FBgn0262945	-0.56818	0.55055
FBgn0283479	-0.433655	0.55055
FBgn0011555	-0.484288	0.551058
FBgn0028734	0.426815	0.551058
FBgn0031249	-0.461364	0.551058
FBgn0038292	-0.4862	0.551058
FBgn0039444	-0.388369	0.551058
FBgn0040260	-0.531483	0.551058
FBgn0051901	-0.474191	0.551058
FBgn0085358	-0.463734	0.551058
FBgn0261602	-0.377684	0.551058
FBgn0031561	-0.479223	0.552228
FBgn0011481	0.369686	0.552335
FBgn0039154	-0.519907	0.552335
FBgn0040843	-0.534096	0.552335
FBgn0051163	0.501976	0.552335
FBgn0004047	-0.480448	0.554707
FBgn0004378	0.447751	0.554707
FBgn0020257	-0.538386	0.554707
FBgn0025864	0.431705	0.554707
FBgn0026573	0.427299	0.554707
FBgn0029823	-0.431465	0.554707
FBgn0031811	0.483672	0.554707
FBgn0032869	-0.548009	0.554707
FBgn0034181	0.369518	0.554707
FBgn0036398	0.386857	0.554707
FBgn0036820	-0.399878	0.554707
FBgn0040723	-0.475293	0.554707
FBgn0043001	0.381724	0.554707
FBgn0051961	0.456011	0.554707
FBgn0250832	-0.549993	0.554707
FBgn0266577	0.400811	0.554707
FBgn0033996	0.443547	0.554817
FBgn0029507	-0.465603	0.555931
FBgn0029979	0.399637	0.555931
FBgn0032489	-0.534911	0.555931
FBgn0034114	0.50791	0.555931
FBgn0034158	0.411171	0.555931
FBgn0035737	-0.433856	0.555931
FBgn0039733	0.407811	0.555931
FBgn0039800	-0.554926	0.555931
FBgn0043884	0.391842	0.555931
FBgn0083951	-0.35095	0.555931
FBgn0085205	-0.494316	0.555931
FBgn0264296	-0.466586	0.555931
FBgn0004428	-0.458816	0.558191
FBgn0083936	-0.543481	0.558191
FBgn0000504	-0.474153	0.558881
FBgn0003410	0.375224	0.558881
FBgn0003575	0.481946	0.558881
FBgn0003863	-0.45531	0.558881
FBgn0010741	0.377507	0.558881
FBgn0021796	0.53617	0.558881
FBgn0022942	0.444682	0.558881
FBgn0028475	0.429066	0.558881
FBgn0030040	-0.477219	0.558881
FBgn0030625	0.548109	0.558881
FBgn0030837	-0.462371	0.558881
FBgn0031771	-0.38242	0.558881
FBgn0032022	-0.542803	0.558881
FBgn0032698	0.460566	0.558881
FBgn0032955	0.490189	0.558881
FBgn0033504	-0.512085	0.558881
FBgn0034436	-0.477247	0.558881
FBgn0035511	-0.368237	0.558881
FBgn0035743	-0.467854	0.558881
FBgn0035969	0.547015	0.558881
FBgn0036203	-0.468913	0.558881
FBgn0038484	-0.48841	0.558881
FBgn0039778	-0.45921	0.558881
FBgn0039932	0.555733	0.558881
FBgn0050009	-0.347574	0.558881
FBgn0052205	-0.556655	0.558881
FBgn0263080	-0.467914	0.558881
FBgn0033548	-0.368029	0.559634
FBgn0043458	0.467467	0.561272
FBgn0027521	0.411915	0.564573
FBgn0028543	-0.522922	0.564573
FBgn0029763	0.405845	0.564573
FBgn0029893	0.391257	0.564573
FBgn0031914	-0.540314	0.564573
FBgn0032378	0.446421	0.564573
FBgn0035872	0.377002	0.564573
FBgn0035918	0.411874	0.564573
FBgn0036433	-0.502314	0.564573
FBgn0036563	-0.539781	0.564573
FBgn0037466	0.535841	0.564573
FBgn0038741	0.552999	0.564573
FBgn0038803	0.423094	0.564573
FBgn0039680	0.458385	0.564573
FBgn0265185	-0.464196	0.564573
FBgn0011817	0.379393	0.565398
FBgn0013685	0.508361	0.565398
FBgn0039754	-0.477553	0.565398
FBgn0027054	0.412274	0.565561
FBgn0002643	0.5349	0.565735
FBgn0015600	0.47136	0.567792
FBgn0032002	-0.491313	0.569665
FBgn0054003	-0.474914	0.569665
FBgn0000547	0.463543	0.570954
FBgn0037429	-0.41936	0.570954
FBgn0038294	-0.491079	0.570954
FBgn0263235	-0.47047	0.570954
FBgn0003890	-0.514704	0.571444
FBgn0033788	-0.432348	0.57316
FBgn0263380	-0.523607	0.57316
FBgn0015929	0.450387	0.574211
FBgn0010357	-0.44358	0.574494
FBgn0031799	0.509309	0.574494
FBgn0034317	-0.437018	0.574494
FBgn0036833	-0.487078	0.574494
FBgn0027537	0.480349	0.574547
FBgn0033423	-0.49271	0.574547
FBgn0033584	0.54178	0.574547
FBgn0037778	0.525801	0.574547
FBgn0052104	0.525184	0.574547
FBgn0260991	0.361638	0.574547
FBgn0001565	0.396741	0.577
FBgn0010358	-0.466982	0.577
FBgn0015926	0.420246	0.577
FBgn0028497	0.438347	0.577
FBgn0031032	-0.515755	0.577
FBgn0036422	-0.459145	0.577
FBgn0261385	0.42905	0.577
FBgn0263102	0.385445	0.577
FBgn0038404	-0.544372	0.577173
FBgn0000212	0.418732	0.578255
FBgn0262127	0.460594	0.578265
FBgn0045800	-0.536737	0.578277
FBgn0001981	-0.508736	0.5792
FBgn0051075	-0.513435	0.5792
FBgn0039272	-0.461483	0.582256
FBgn0025608	0.384719	0.5829
FBgn0029899	0.411982	0.5829
FBgn0034246	0.513451	0.5829
FBgn0040687	-0.435824	0.5829
FBgn0050101	-0.383644	0.5829
FBgn0000581	0.410849	0.583272
FBgn0001276	0.453994	0.583272
FBgn0013672	-0.332174	0.583272
FBgn0035915	-0.504936	0.583272
FBgn0261061	-0.520374	0.583272
FBgn0011603	-0.518704	0.588037
FBgn0013763	0.355493	0.588037
FBgn0030717	0.487482	0.588037
FBgn0034512	-0.478159	0.588037
FBgn0261984	0.456666	0.588037
FBgn0002789	-0.504027	0.588875
FBgn0031011	-0.488617	0.588875
FBgn0036756	-0.52414	0.588875
FBgn0040959	-0.465282	0.588875
FBgn0263599	0.480671	0.588875
FBgn0037336	0.442537	0.589861
FBgn0027786	-0.387672	0.590639
FBgn0035793	0.4502	0.590639
FBgn0035964	-0.456397	0.590639
FBgn0050394	0.441264	0.590639
FBgn0051301	0.383766	0.590639
FBgn0261238	0.407543	0.590639
FBgn0267001	0.500062	0.590639
FBgn0032491	-0.44361	0.591594
FBgn0010497	-0.407011	0.592689
FBgn0038381	0.479133	0.592689
FBgn0085236	-0.459865	0.592689
FBgn0034010	-0.477697	0.593699
FBgn0261258	-0.496709	0.593699
FBgn0003065	-0.34409	0.594429
FBgn0010877	0.395375	0.594429
FBgn0025936	0.4634	0.594429
FBgn0013705	-0.447456	0.595383
FBgn0027950	0.410742	0.595383
FBgn0034312	-0.498026	0.595383
FBgn0034313	0.462418	0.595383
FBgn0000996	0.391262	0.595665
FBgn0001122	0.40728	0.595665
FBgn0020906	-0.445933	0.595665
FBgn0023407	0.455384	0.595665
FBgn0028387	0.486028	0.595665
FBgn0031711	0.38628	0.595665
FBgn0032635	-0.394441	0.595665
FBgn0043575	-0.472383	0.595665
FBgn0052412	-0.410831	0.595665
FBgn0058178	-0.516676	0.595665
FBgn0010039	-0.523376	0.597578
FBgn0011474	0.412061	0.598952
FBgn0003969	0.494419	0.600197
FBgn0033688	0.368117	0.600197
FBgn0035842	0.459304	0.600197
FBgn0262740	0.424754	0.600197
FBgn0032475	0.383189	0.601236
FBgn0039141	0.425186	0.601236
FBgn0040007	-0.318164	0.601236
FBgn0030556	0.419799	0.601588
FBgn0032702	0.436488	0.601588
FBgn0002783	0.371159	0.602464
FBgn0004108	-0.518891	0.602464
FBgn0004655	0.369133	0.602464
FBgn0012037	-0.458187	0.602464
FBgn0013726	0.359954	0.602464
FBgn0019661	-0.509786	0.602464
FBgn0027492	0.354281	0.602464
FBgn0028532	-0.502729	0.602464
FBgn0028583	-0.472389	0.602464
FBgn0028744	0.479136	0.602464
FBgn0029131	-0.398241	0.602464
FBgn0030081	0.440891	0.602464
FBgn0030504	0.485925	0.602464
FBgn0030775	-0.436565	0.602464
FBgn0030871	0.39903	0.602464
FBgn0031313	-0.524727	0.602464
FBgn0031713	-0.493687	0.602464
FBgn0032074	-0.424696	0.602464
FBgn0032321	0.437802	0.602464
FBgn0032614	-0.508539	0.602464
FBgn0032615	-0.525215	0.602464
FBgn0032929	0.448319	0.602464
FBgn0033787	-0.423138	0.602464
FBgn0034318	-0.454515	0.602464
FBgn0034491	0.398486	0.602464
FBgn0034583	-0.426023	0.602464
FBgn0035423	-0.353005	0.602464
FBgn0036601	-0.368388	0.602464
FBgn0036678	-0.353807	0.602464
FBgn0038756	-0.467325	0.602464
FBgn0039118	-0.526905	0.602464
FBgn0039250	0.434325	0.602464
FBgn0039631	0.500634	0.602464
FBgn0039914	0.442983	0.602464
FBgn0051865	0.315396	0.602464
FBgn0052283	-0.471216	0.602464
FBgn0085223	-0.489678	0.602464
FBgn0086450	-0.488025	0.602464
FBgn0243586	-0.311637	0.602464
FBgn0259979	0.348267	0.602464
FBgn0260722	0.48648	0.602464
FBgn0261456	0.504053	0.602464
FBgn0261574	0.456627	0.602464
FBgn0262580	-0.509438	0.602464
FBgn0265574	0.471643	0.602464
FBgn0000075	-0.384543	0.602657
FBgn0004837	0.420062	0.602853
FBgn0030038	0.365401	0.602853
FBgn0032049	-0.426055	0.602853
FBgn0033153	-0.415017	0.602853
FBgn0038642	-0.348491	0.602853
FBgn0052564	-0.421092	0.602853
FBgn0003345	-0.43688	0.603359
FBgn0020633	0.37638	0.603359
FBgn0029944	0.416402	0.603359
FBgn0030744	0.470723	0.603359
FBgn0038681	-0.509572	0.603359
FBgn0038842	-0.469313	0.603359
FBgn0051663	-0.512885	0.603359
FBgn0053127	-0.438354	0.603359
FBgn0261276	0.384258	0.603359
FBgn0266717	0.433072	0.603359
FBgn0000289	0.344936	0.603744
FBgn0003525	0.334207	0.603744
FBgn0014380	-0.466526	0.603744
FBgn0015321	0.379552	0.603744
FBgn0027889	0.385454	0.603744
FBgn0028426	0.505351	0.603744
FBgn0031023	0.484781	0.603744
FBgn0031489	-0.467195	0.603744
FBgn0031598	0.469494	0.603744
FBgn0035707	0.433792	0.603744
FBgn0036589	-0.515983	0.603744
FBgn0037065	-0.459905	0.603744
FBgn0037074	0.432392	0.603744
FBgn0037351	-0.316648	0.603744
FBgn0037963	0.462642	0.603744
FBgn0038857	-0.414527	0.603744
FBgn0039682	-0.488629	0.603744
FBgn0039958	0.46384	0.603744
FBgn0042105	-0.467667	0.603744
FBgn0265630	0.431842	0.603744
FBgn0016076	-0.466087	0.605404
FBgn0000008	0.501964	0.605884
FBgn0000524	0.399158	0.605884
FBgn0001086	0.385455	0.605884
FBgn0001087	0.39518	0.605884
FBgn0001206	0.504626	0.605884
FBgn0001311	-0.301842	0.605884
FBgn0002069	-0.374865	0.605884
FBgn0003124	0.367899	0.605884
FBgn0003301	-0.511213	0.605884
FBgn0005638	-0.451212	0.605884
FBgn0010342	0.37531	0.605884
FBgn0011296	-0.49454	0.605884
FBgn0011695	-0.45086	0.605884
FBgn0016694	-0.412896	0.605884
FBgn0019643	-0.443613	0.605884
FBgn0020261	0.430108	0.605884
FBgn0026378	0.496816	0.605884
FBgn0027504	0.422315	0.605884
FBgn0027592	0.452365	0.605884
FBgn0028471	0.40854	0.605884
FBgn0028484	0.419927	0.605884
FBgn0028534	-0.452344	0.605884
FBgn0029873	0.390655	0.605884
FBgn0030026	-0.440796	0.605884
FBgn0030098	-0.416733	0.605884
FBgn0031043	0.388829	0.605884
FBgn0031493	0.390643	0.605884
FBgn0031573	0.488049	0.605884
FBgn0032087	-0.428373	0.605884
FBgn0032144	-0.430437	0.605884
FBgn0032242	0.360959	0.605884
FBgn0033638	0.386434	0.605884
FBgn0033752	0.45965	0.605884
FBgn0033757	0.345783	0.605884
FBgn0033774	-0.388855	0.605884
FBgn0033960	-0.335927	0.605884
FBgn0034046	0.399199	0.605884
FBgn0034072	0.459297	0.605884
FBgn0034237	0.35125	0.605884
FBgn0034247	-0.4594	0.605884
FBgn0034582	-0.475364	0.605884
FBgn0035315	-0.416223	0.605884
FBgn0035661	-0.446894	0.605884
FBgn0035665	-0.410593	0.605884
FBgn0035926	-0.426743	0.605884
FBgn0035936	0.389501	0.605884
FBgn0036135	-0.426596	0.605884
FBgn0036340	0.414428	0.605884
FBgn0036661	0.345542	0.605884
FBgn0036746	0.400328	0.605884
FBgn0036766	-0.406987	0.605884
FBgn0036806	-0.453617	0.605884
FBgn0036915	0.409991	0.605884
FBgn0037369	0.470378	0.605884
FBgn0037660	0.442722	0.605884
FBgn0038845	-0.469274	0.605884
FBgn0039469	-0.318654	0.605884
FBgn0039474	-0.460466	0.605884
FBgn0039769	-0.49924	0.605884
FBgn0039959	0.414957	0.605884
FBgn0040850	-0.495507	0.605884
FBgn0041180	-0.46988	0.605884
FBgn0042185	0.412717	0.605884
FBgn0044324	0.396769	0.605884
FBgn0046302	-0.417314	0.605884
FBgn0051224	0.433787	0.605884
FBgn0051974	-0.470279	0.605884
FBgn0052633	-0.440824	0.605884
FBgn0052650	0.396078	0.605884
FBgn0063494	-0.375346	0.605884
FBgn0085424	-0.475452	0.605884
FBgn0086680	-0.491844	0.605884
FBgn0259748	-0.427025	0.605884
FBgn0261836	-0.432576	0.605884
FBgn0263445	-0.507254	0.605884
FBgn0264922	0.311427	0.605884
FBgn0267967	-0.507427	0.605884
FBgn0000250	0.323539	0.606164
FBgn0000606	-0.385273	0.606164
FBgn0000721	0.325486	0.606164
FBgn0001248	-0.325879	0.606164
FBgn0001253	-0.396135	0.606164
FBgn0002869	-0.463536	0.606164
FBgn0003701	0.421658	0.606164
FBgn0003733	0.396177	0.606164
FBgn0003741	0.461922	0.606164
FBgn0003891	0.406224	0.606164
FBgn0004045	-0.410601	0.606164
FBgn0004373	0.390566	0.606164
FBgn0005386	0.453702	0.606164
FBgn0005391	-0.43506	0.606164
FBgn0005632	0.364212	0.606164
FBgn0005642	0.343676	0.606164
FBgn0005649	0.330766	0.606164
FBgn0010225	-0.475654	0.606164
FBgn0010425	-0.40663	0.606164
FBgn0011260	0.460197	0.606164
FBgn0011722	-0.419074	0.606164
FBgn0013675	-0.298235	0.606164
FBgn0013765	0.379538	0.606164
FBgn0014002	0.314097	0.606164
FBgn0014075	0.441489	0.606164
FBgn0014427	-0.383941	0.606164
FBgn0015039	-0.428846	0.606164
FBgn0015331	0.451068	0.606164
FBgn0016672	-0.416092	0.606164
FBgn0017482	-0.494888	0.606164
FBgn0020910	0.290843	0.606164
FBgn0021818	0.418729	0.606164
FBgn0022702	-0.447572	0.606164
FBgn0023081	0.405373	0.606164
FBgn0023507	-0.462509	0.606164
FBgn0023522	0.432792	0.606164
FBgn0024321	-0.485263	0.606164
FBgn0024728	0.420632	0.606164
FBgn0025626	0.365869	0.606164
FBgn0025630	-0.482773	0.606164
FBgn0026083	0.3542	0.606164
FBgn0026199	0.455951	0.606164
FBgn0026441	0.427072	0.606164
FBgn0026576	0.361669	0.606164
FBgn0027084	0.338006	0.606164
FBgn0027567	0.335757	0.606164
FBgn0027570	-0.464613	0.606164
FBgn0027948	0.426615	0.606164
FBgn0028518	-0.481745	0.606164
FBgn0029173	0.415776	0.606164
FBgn0029686	0.471437	0.606164
FBgn0029804	-0.482147	0.606164
FBgn0030018	0.361463	0.606164
FBgn0030048	0.410532	0.606164
FBgn0030228	0.349109	0.606164
FBgn0030272	-0.489523	0.606164
FBgn0030328	0.368004	0.606164
FBgn0030394	-0.300351	0.606164
FBgn0030746	-0.491504	0.606164
FBgn0030969	0.381761	0.606164
FBgn0030980	-0.345791	0.606164
FBgn0031051	0.380631	0.606164
FBgn0031248	-0.475403	0.606164
FBgn0031434	0.341125	0.606164
FBgn0031580	-0.356584	0.606164
FBgn0031740	0.462252	0.606164
FBgn0031773	0.445169	0.606164
FBgn0031885	0.436756	0.606164
FBgn0032196	0.388715	0.606164
FBgn0032283	-0.499976	0.606164
FBgn0032422	-0.498504	0.606164
FBgn0032538	-0.393	0.606164
FBgn0032586	0.364019	0.606164
FBgn0032701	0.428279	0.606164
FBgn0032715	-0.39264	0.606164
FBgn0032773	-0.489868	0.606164
FBgn0032775	-0.479138	0.606164
FBgn0032889	-0.411637	0.606164
FBgn0032979	0.418709	0.606164
FBgn0033134	-0.477254	0.606164
FBgn0033166	0.413877	0.606164
FBgn0033205	-0.41299	0.606164
FBgn0033518	-0.428635	0.606164
FBgn0033526	0.405693	0.606164
FBgn0033713	0.462165	0.606164
FBgn0033715	0.430761	0.606164
FBgn0033721	-0.319654	0.606164
FBgn0033907	-0.363988	0.606164
FBgn0033915	0.406219	0.606164
FBgn0034052	-0.446916	0.606164
FBgn0034142	-0.469089	0.606164
FBgn0034639	-0.470014	0.606164
FBgn0034657	0.360898	0.606164
FBgn0034718	-0.445643	0.606164
FBgn0035249	0.461799	0.606164
FBgn0035542	-0.409142	0.606164
FBgn0035548	-0.349042	0.606164
FBgn0035619	-0.43606	0.606164
FBgn0035620	-0.421943	0.606164
FBgn0035625	-0.451774	0.606164
FBgn0035666	-0.388506	0.606164
FBgn0035689	0.433847	0.606164
FBgn0035839	-0.488296	0.606164
FBgn0035858	-0.360156	0.606164
FBgn0035904	-0.450876	0.606164
FBgn0035959	0.387563	0.606164
FBgn0035997	0.353763	0.606164
FBgn0036005	0.398995	0.606164
FBgn0036106	-0.433726	0.606164
FBgn0036213	-0.297429	0.606164
FBgn0036320	-0.453799	0.606164
FBgn0036335	-0.394133	0.606164
FBgn0036367	-0.445309	0.606164
FBgn0036419	-0.401661	0.606164
FBgn0036588	-0.36069	0.606164
FBgn0036684	0.486238	0.606164
FBgn0036871	-0.322776	0.606164
FBgn0036948	-0.417151	0.606164
FBgn0036958	0.384209	0.606164
FBgn0037025	0.456276	0.606164
FBgn0037073	0.387573	0.606164
FBgn0037090	-0.470284	0.606164
FBgn0037315	-0.378561	0.606164
FBgn0037323	-0.390265	0.606164
FBgn0037391	-0.453352	0.606164
FBgn0037539	0.419147	0.606164
FBgn0037563	-0.479229	0.606164
FBgn0037633	0.482671	0.606164
FBgn0037637	-0.397941	0.606164
FBgn0037873	-0.352472	0.606164
FBgn0037876	0.493057	0.606164
FBgn0038012	-0.397686	0.606164
FBgn0038100	0.354205	0.606164
FBgn0038145	0.332418	0.606164
FBgn0038316	0.501034	0.606164
FBgn0038320	0.408783	0.606164
FBgn0038391	-0.496223	0.606164
FBgn0039045	-0.495941	0.606164
FBgn0039068	-0.444111	0.606164
FBgn0039310	-0.416394	0.606164
FBgn0039359	0.300149	0.606164
FBgn0039403	0.41071	0.606164
FBgn0039761	-0.413562	0.606164
FBgn0039790	-0.368925	0.606164
FBgn0039897	-0.443754	0.606164
FBgn0039941	-0.497064	0.606164
FBgn0040060	-0.401543	0.606164
FBgn0040600	-0.457395	0.606164
FBgn0041337	-0.315515	0.606164
FBgn0044049	-0.47161	0.606164
FBgn0044812	-0.446631	0.606164
FBgn0050272	-0.501518	0.606164
FBgn0051198	-0.410863	0.606164
FBgn0051739	0.408827	0.606164
FBgn0053346	-0.473305	0.606164
FBgn0082598	0.328603	0.606164
FBgn0085322	-0.447586	0.606164
FBgn0085436	0.322783	0.606164
FBgn0086442	0.42941	0.606164
FBgn0086779	0.405268	0.606164
FBgn0086895	0.413533	0.606164
FBgn0086906	-0.48182	0.606164
FBgn0087002	-0.426484	0.606164
FBgn0250786	0.378187	0.606164
FBgn0259101	-0.466325	0.606164
FBgn0259685	0.456302	0.606164
FBgn0260795	0.357223	0.606164
FBgn0261503	-0.444221	0.606164
FBgn0261608	-0.298667	0.606164
FBgn0262467	-0.421364	0.606164
FBgn0263234	-0.475892	0.606164
FBgn0263490	0.421532	0.606164
FBgn0263597	-0.452737	0.606164
FBgn0263930	-0.43533	0.606164
FBgn0264295	-0.425977	0.606164
FBgn0265533	0.314708	0.606164
FBgn0266064	0.345862	0.606164
FBgn0266084	0.436984	0.606164
FBgn0267487	0.320385	0.606164
FBgn0267912	0.360554	0.606164
FBgn0283666	0.380536	0.606164
FBgn0284245	0.301422	0.606164
FBgn0001291	-0.412293	0.606974
FBgn0032433	-0.455551	0.606974
FBgn0033668	-0.359197	0.606974
FBgn0085446	-0.452856	0.606974
FBgn0011822	-0.478375	0.609377
FBgn0051992	0.317851	0.60942
FBgn0052479	0.376798	0.60942
FBgn0029176	0.298774	0.609463
FBgn0032516	0.411599	0.609463
FBgn0036967	0.364249	0.609463
FBgn0039870	0.394811	0.609463
FBgn0058045	-0.297061	0.609463
FBgn0085249	-0.396985	0.609463
FBgn0260000	-0.462299	0.609463
FBgn0262081	0.365305	0.609463
FBgn0263256	-0.483394	0.609463
FBgn0031070	0.410035	0.610116
FBgn0031654	-0.4215	0.610116
FBgn0040606	-0.465248	0.610116
FBgn0261797	0.47732	0.610116
FBgn0010019	-0.458987	0.610335
FBgn0030877	0.419116	0.612137
FBgn0030631	0.387467	0.612683
FBgn0032116	-0.480516	0.612683
FBgn0033357	-0.313372	0.613014
FBgn0052280	-0.478803	0.613014
FBgn0030000	0.384583	0.61312
FBgn0033826	-0.424818	0.613782
FBgn0036993	-0.461032	0.613782
FBgn0039167	-0.425487	0.613782
FBgn0085430	0.423113	0.613782
FBgn0264489	-0.461531	0.613782
FBgn0032859	0.316336	0.613977
FBgn0035461	0.453793	0.614824
FBgn0032803	-0.269255	0.614887
FBgn0027844	-0.439665	0.615171
FBgn0033635	-0.351134	0.615171
FBgn0025394	0.386759	0.615425
FBgn0035945	0.376732	0.615425
FBgn0259678	-0.451709	0.615425
FBgn0264750	-0.391464	0.615425
FBgn0284248	0.418221	0.615425
FBgn0028690	0.303095	0.615733
FBgn0005355	0.375938	0.617681
FBgn0033737	0.349502	0.617681
FBgn0052282	-0.449345	0.617681
FBgn0010651	-0.40083	0.618171
FBgn0011826	0.389259	0.618171
FBgn0032213	-0.47492	0.618171
FBgn0051259	-0.476864	0.61835
FBgn0029685	0.382831	0.618872
FBgn0015772	0.43673	0.618963
FBgn0036373	0.47189	0.618963
FBgn0003961	-0.390792	0.618974
FBgn0032600	0.361082	0.618974
FBgn0263048	0.475421	0.618974
FBgn0036738	-0.405721	0.619527
FBgn0261068	-0.366454	0.619527
FBgn0262509	-0.410468	0.619527
FBgn0000319	0.360403	0.621584
FBgn0002872	0.408735	0.621584
FBgn0003462	-0.316062	0.621584
FBgn0015278	0.395322	0.621584
FBgn0029766	-0.346167	0.621584
FBgn0031913	-0.425546	0.621584
FBgn0032490	-0.361051	0.621584
FBgn0033458	0.38941	0.621584
FBgn0035911	-0.413507	0.621584
FBgn0035916	0.433258	0.621584
FBgn0036945	-0.405012	0.621584
FBgn0037678	-0.408455	0.621584
FBgn0038973	-0.391671	0.621584
FBgn0039756	-0.402513	0.621584
FBgn0040349	-0.444875	0.621584
FBgn0051716	0.356619	0.621584
FBgn0053868	0.383037	0.621584
FBgn0264776	-0.400683	0.621584
FBgn0265577	-0.470749	0.621584
FBgn0266742	-0.388193	0.621584
FBgn0013799	0.368639	0.621963
FBgn0026326	0.386853	0.621963
FBgn0034289	-0.392014	0.621963
FBgn0050115	-0.457484	0.621963
FBgn0051121	-0.425263	0.621963
FBgn0010355	0.449444	0.622874
FBgn0052758	0.42515	0.623309
FBgn0259711	-0.378158	0.623309
FBgn0001197	0.336253	0.623327
FBgn0002570	-0.393502	0.623327
FBgn0003169	0.395035	0.623327
FBgn0004430	-0.426994	0.623327
FBgn0010100	0.34881	0.623327
FBgn0013718	0.414598	0.623327
FBgn0016726	-0.28146	0.623327
FBgn0017545	0.291378	0.623327
FBgn0019947	0.351151	0.623327
FBgn0025692	-0.403751	0.623327
FBgn0025743	0.371089	0.623327
FBgn0025839	-0.34994	0.623327
FBgn0026313	0.42796	0.623327
FBgn0027587	0.407714	0.623327
FBgn0027841	0.39706	0.623327
FBgn0030864	0.334659	0.623327
FBgn0030943	0.319331	0.623327
FBgn0032131	-0.472542	0.623327
FBgn0033999	-0.456539	0.623327
FBgn0035546	-0.258815	0.623327
FBgn0035617	0.400183	0.623327
FBgn0035763	0.351895	0.623327
FBgn0036109	-0.301719	0.623327
FBgn0036534	0.334972	0.623327
FBgn0037504	0.452401	0.623327
FBgn0037534	-0.470818	0.623327
FBgn0037702	0.352506	0.623327
FBgn0037844	0.303223	0.623327
FBgn0038516	-0.469247	0.623327
FBgn0038930	-0.465275	0.623327
FBgn0039016	0.399674	0.623327
FBgn0039638	0.414544	0.623327
FBgn0039645	-0.472112	0.623327
FBgn0050035	-0.469165	0.623327
FBgn0051343	-0.39802	0.623327
FBgn0052224	-0.393928	0.623327
FBgn0052428	0.345985	0.623327
FBgn0250754	0.429679	0.623327
FBgn0250906	-0.326818	0.623327
FBgn0261119	0.346558	0.623327
FBgn0261575	-0.408525	0.623327
FBgn0262743	0.311856	0.623327
FBgn0266000	0.355814	0.623327
FBgn0003996	-0.440932	0.62401
FBgn0005666	-0.450372	0.62401
FBgn0010348	0.399194	0.62401
FBgn0013720	0.385068	0.62401
FBgn0033615	0.451335	0.62401
FBgn0035947	0.323692	0.62401
FBgn0036667	-0.352766	0.62401
FBgn0037727	-0.382973	0.62401
FBgn0259992	-0.468252	0.62401
FBgn0034031	-0.419944	0.624655
FBgn0002466	0.434839	0.625134
FBgn0023167	0.29132	0.625134
FBgn0024887	0.415471	0.625134
FBgn0024998	0.409029	0.625134
FBgn0027843	0.414469	0.625134
FBgn0029896	-0.396455	0.625134
FBgn0030320	0.371305	0.625134
FBgn0030812	0.349194	0.625134
FBgn0031115	0.464452	0.625134
FBgn0031360	0.316838	0.625134
FBgn0031517	-0.439076	0.625134
FBgn0031600	-0.400711	0.625134
FBgn0032006	-0.448504	0.625134
FBgn0032400	-0.309212	0.625134
FBgn0034500	-0.433672	0.625134
FBgn0034572	0.385997	0.625134
FBgn0035649	-0.297437	0.625134
FBgn0036428	0.349806	0.625134
FBgn0036846	0.430208	0.625134
FBgn0040075	0.327686	0.625134
FBgn0040080	0.38623	0.625134
FBgn0040837	-0.392742	0.625134
FBgn0052302	-0.397277	0.625134
FBgn0052368	-0.39647	0.625134
FBgn0250815	-0.377813	0.625134
FBgn0261793	0.303958	0.625134
FBgn0261986	0.376457	0.625134
FBgn0262714	0.382609	0.625134
FBgn0267516	-0.378836	0.625134
FBgn0267733	-0.461092	0.625134
FBgn0004368	0.345676	0.625699
FBgn0266455	-0.407447	0.625699
FBgn0032171	-0.460404	0.625744
FBgn0001974	0.406518	0.625766
FBgn0003261	0.292448	0.625766
FBgn0003638	0.388668	0.625766
FBgn0004436	0.321588	0.625766
FBgn0005411	0.314418	0.625766
FBgn0013701	-0.45691	0.625766
FBgn0015521	-0.278175	0.625766
FBgn0019968	0.447392	0.625766
FBgn0019990	0.454086	0.625766
FBgn0022700	-0.415219	0.625766
FBgn0023516	-0.39362	0.625766
FBgn0025683	-0.376573	0.625766
FBgn0026076	0.337293	0.625766
FBgn0027359	-0.322129	0.625766
FBgn0027568	0.437426	0.625766
FBgn0028579	0.425844	0.625766
FBgn0029941	0.306416	0.625766
FBgn0030241	0.3145	0.625766
FBgn0030466	0.406881	0.625766
FBgn0030738	0.33445	0.625766
FBgn0030858	0.395467	0.625766
FBgn0031099	-0.435929	0.625766
FBgn0031390	0.40806	0.625766
FBgn0031850	-0.310558	0.625766
FBgn0032454	0.386457	0.625766
FBgn0033733	-0.40418	0.625766
FBgn0034098	0.406495	0.625766
FBgn0034160	-0.385203	0.625766
FBgn0034501	-0.399028	0.625766
FBgn0034570	0.382447	0.625766
FBgn0035462	0.456517	0.625766
FBgn0035582	-0.331484	0.625766
FBgn0035583	-0.379901	0.625766
FBgn0035975	-0.448702	0.625766
FBgn0037218	0.408145	0.625766
FBgn0037232	0.458652	0.625766
FBgn0037717	0.45046	0.625766
FBgn0037819	-0.40432	0.625766
FBgn0038065	0.338477	0.625766
FBgn0038136	-0.446009	0.625766
FBgn0038200	-0.354585	0.625766
FBgn0038438	0.361576	0.625766
FBgn0038542	-0.462506	0.625766
FBgn0038639	0.431121	0.625766
FBgn0038784	-0.303328	0.625766
FBgn0038790	-0.409404	0.625766
FBgn0039560	0.387478	0.625766
FBgn0050277	-0.452229	0.625766
FBgn0051106	-0.441624	0.625766
FBgn0058191	0.340051	0.625766
FBgn0083987	-0.392116	0.625766
FBgn0085229	-0.325202	0.625766
FBgn0085359	-0.404305	0.625766
FBgn0085370	0.373711	0.625766
FBgn0086384	0.351968	0.625766
FBgn0086675	-0.461036	0.625766
FBgn0263289	0.361385	0.625766
FBgn0265778	0.393013	0.625766
FBgn0266405	-0.428397	0.625766
FBgn0003886	-0.308031	0.625857
FBgn0010774	0.299422	0.625857
FBgn0034322	0.251663	0.625857
FBgn0035761	0.379052	0.625857
FBgn0054040	-0.424539	0.625857
FBgn0261383	0.364377	0.626275
FBgn0034997	-0.413451	0.627701
FBgn0000044	-0.43258	0.628485
FBgn0030364	0.315924	0.629201
FBgn0034365	-0.375308	0.629344
FBgn0037379	0.366689	0.629344
FBgn0263414	0.424581	0.629803
FBgn0014411	0.353212	0.630092
FBgn0000146	0.351829	0.630116
FBgn0002354	0.37308	0.630116
FBgn0004512	-0.423995	0.630116
FBgn0027108	0.344747	0.630116
FBgn0027951	0.358836	0.630116
FBgn0030763	-0.305633	0.630116
FBgn0036232	-0.392465	0.630116
FBgn0037562	-0.395691	0.630116
FBgn0051365	0.416211	0.630116
FBgn0052600	-0.306126	0.630116
FBgn0259927	-0.418824	0.630116
FBgn0262508	-0.455959	0.630116
FBgn0250836	-0.374533	0.630206
FBgn0001965	0.450022	0.630237
FBgn0002638	0.29759	0.630237
FBgn0002906	0.419281	0.630237
FBgn0003346	0.335137	0.630237
FBgn0014029	0.342319	0.630237
FBgn0015229	0.343199	0.630237
FBgn0015589	0.40479	0.630237
FBgn0017457	0.305488	0.630237
FBgn0019644	-0.31948	0.630237
FBgn0024150	-0.381292	0.630237
FBgn0024361	-0.401567	0.630237
FBgn0028945	-0.418232	0.630237
FBgn0029092	0.331909	0.630237
FBgn0030539	-0.309318	0.630237
FBgn0031233	0.40723	0.630237
FBgn0033081	0.288576	0.630237
FBgn0034071	0.323589	0.630237
FBgn0035390	0.374192	0.630237
FBgn0035767	-0.453145	0.630237
FBgn0035769	0.406045	0.630237
FBgn0036850	0.427742	0.630237
FBgn0036994	0.363141	0.630237
FBgn0037081	0.355394	0.630237
FBgn0037199	-0.289907	0.630237
FBgn0037443	0.420438	0.630237
FBgn0037788	-0.385754	0.630237
FBgn0038243	-0.390736	0.630237
FBgn0038390	0.427201	0.630237
FBgn0038453	0.319324	0.630237
FBgn0038526	-0.286291	0.630237
FBgn0038972	-0.355385	0.630237
FBgn0039269	0.402302	0.630237
FBgn0039635	-0.31296	0.630237
FBgn0040729	-0.376638	0.630237
FBgn0040734	-0.403504	0.630237
FBgn0040827	-0.355873	0.630237
FBgn0045852	-0.44139	0.630237
FBgn0051324	-0.425166	0.630237
FBgn0054025	0.308079	0.630237
FBgn0260008	-0.295554	0.630237
FBgn0262734	0.31179	0.630237
FBgn0264490	-0.383415	0.630237
FBgn0034976	0.416774	0.630794
FBgn0035825	-0.381474	0.630794
FBgn0035866	0.361927	0.630794
FBgn0039644	0.312476	0.630794
FBgn0086355	-0.321058	0.630794
FBgn0261931	0.355051	0.630794
FBgn0262866	0.380227	0.630794
FBgn0033760	-0.4135	0.631139
FBgn0038682	-0.42372	0.631802
FBgn0083983	-0.326241	0.631802
FBgn0250868	-0.355785	0.631802
FBgn0031824	-0.430848	0.631884
FBgn0050185	-0.380065	0.632299
FBgn0025457	0.332196	0.632303
FBgn0032817	0.441374	0.632303
FBgn0034602	-0.449728	0.632303
FBgn0039851	-0.321514	0.632606
FBgn0034743	-0.26504	0.632811
FBgn0015582	-0.3758	0.633024
FBgn0034321	0.343423	0.633024
FBgn0037936	-0.434048	0.633614
FBgn0011742	0.367586	0.633755
FBgn0001324	0.399146	0.633757
FBgn0017550	0.340105	0.633757
FBgn0036289	-0.412126	0.633757
FBgn0039767	0.3427	0.633757
FBgn0261554	0.398858	0.635036
FBgn0036805	-0.338	0.636099
FBgn0051755	0.41809	0.636099
FBgn0014163	0.312053	0.637351
FBgn0262146	-0.378364	0.637351
FBgn0039664	-0.446819	0.637448
FBgn0010213	-0.312443	0.63751
FBgn0024889	0.350255	0.63751
FBgn0025712	-0.333174	0.63751
FBgn0029820	0.413907	0.63751
FBgn0033122	0.34073	0.63751
FBgn0035358	-0.440032	0.63751
FBgn0036165	0.317854	0.63751
FBgn0039140	0.357457	0.63751
FBgn0266452	0.417086	0.63751
FBgn0052694	-0.417456	0.637514
FBgn0002868	-0.349193	0.63798
FBgn0003044	0.333303	0.63798
FBgn0015393	-0.33947	0.63798
FBgn0025549	0.315011	0.63798
FBgn0028424	-0.430266	0.63798
FBgn0030617	-0.360729	0.63798
FBgn0030999	-0.369582	0.63798
FBgn0032906	0.31727	0.63798
FBgn0034269	0.36136	0.63798
FBgn0036193	0.435666	0.63798
FBgn0036734	0.385548	0.63798
FBgn0040308	-0.373333	0.63798
FBgn0051658	0.406977	0.63798
FBgn0052405	-0.25838	0.63798
FBgn0283508	-0.31712	0.63798
FBgn0266446	-0.418893	0.637993
FBgn0002593	-0.270272	0.638067
FBgn0263929	0.355853	0.638067
FBgn0032793	-0.439513	0.639083
FBgn0036900	0.395645	0.639428
FBgn0038652	-0.420263	0.639779
FBgn0000636	-0.43644	0.63985
FBgn0011224	0.353939	0.63985
FBgn0015576	-0.438699	0.63985
FBgn0015778	0.268863	0.63985
FBgn0020508	-0.3968	0.63985
FBgn0023197	-0.352219	0.63985
FBgn0026713	0.377986	0.63985
FBgn0029840	-0.376451	0.63985
FBgn0030331	-0.293138	0.63985
FBgn0032839	-0.440144	0.63985
FBgn0033158	-0.274952	0.63985
FBgn0037227	-0.272445	0.63985
FBgn0037810	0.37996	0.63985
FBgn0040020	0.378431	0.63985
FBgn0041184	-0.378989	0.63985
FBgn0261987	0.30969	0.63985
FBgn0263037	-0.273636	0.63985
FBgn0283461	-0.411147	0.63985
FBgn0004244	-0.43452	0.640778
FBgn0011837	0.30206	0.640778
FBgn0013272	-0.337644	0.640778
FBgn0030484	-0.414076	0.640778
FBgn0030955	-0.429899	0.640778
FBgn0263144	0.336611	0.640778
FBgn0001125	-0.31377	0.641774
FBgn0011710	0.325418	0.641774
FBgn0025583	-0.399991	0.641774
FBgn0026371	0.434134	0.641774
FBgn0027598	-0.313434	0.641774
FBgn0030582	0.309856	0.641774
FBgn0031398	0.357975	0.641774
FBgn0032620	0.348291	0.641774
FBgn0033050	0.345371	0.641774
FBgn0034406	-0.392878	0.641774
FBgn0035372	-0.412906	0.641774
FBgn0035933	-0.403338	0.641774
FBgn0037670	0.395616	0.641774
FBgn0037707	0.31135	0.641774
FBgn0038183	-0.439241	0.641774
FBgn0038826	-0.378023	0.641774
FBgn0038872	0.376406	0.641774
FBgn0000166	0.332835	0.641855
FBgn0004374	0.386891	0.641855
FBgn0005648	0.341031	0.641855
FBgn0010317	0.435096	0.641855
FBgn0010411	-0.266242	0.641855
FBgn0011703	0.314088	0.641855
FBgn0014863	-0.436419	0.641855
FBgn0015320	0.309523	0.641855
FBgn0015577	-0.437055	0.641855
FBgn0022359	-0.399602	0.641855
FBgn0023216	0.437985	0.641855
FBgn0029970	0.380435	0.641855
FBgn0030309	-0.428743	0.641855
FBgn0030511	-0.424937	0.641855
FBgn0031540	0.368687	0.641855
FBgn0031897	0.399977	0.641855
FBgn0033186	0.432595	0.641855
FBgn0033191	-0.36542	0.641855
FBgn0033341	0.317217	0.641855
FBgn0033454	-0.39452	0.641855
FBgn0033982	-0.437216	0.641855
FBgn0034225	-0.409799	0.641855
FBgn0035886	-0.41724	0.641855
FBgn0037538	0.38446	0.641855
FBgn0039350	0.290916	0.641855
FBgn0039471	-0.370917	0.641855
FBgn0039768	-0.437161	0.641855
FBgn0040491	-0.418788	0.641855
FBgn0041150	0.411882	0.641855
FBgn0050096	0.398794	0.641855
FBgn0051156	0.397336	0.641855
FBgn0051272	-0.433431	0.641855
FBgn0051678	0.411478	0.641855
FBgn0051789	-0.228224	0.641855
FBgn0085227	-0.378829	0.641855
FBgn0086707	0.303287	0.641855
FBgn0261532	0.380052	0.641855
FBgn0261534	-0.398268	0.641855
FBgn0283467	0.404867	0.641855
FBgn0083058	-0.385954	0.641869
FBgn0027500	0.357419	0.641891
FBgn0004387	0.388407	0.642225
FBgn0004431	-0.435212	0.642225
FBgn0005533	-0.271569	0.642225
FBgn0031126	0.299001	0.642225
FBgn0031696	0.366888	0.642225
FBgn0040206	0.341616	0.642225
FBgn0004003	-0.308377	0.643574
FBgn0004636	0.284876	0.643574
FBgn0026869	0.415494	0.643574
FBgn0033451	-0.400567	0.643574
FBgn0034885	-0.404385	0.643574
FBgn0024732	0.357117	0.643668
FBgn0029834	-0.249498	0.643668
FBgn0031579	-0.360483	0.643668
FBgn0034797	-0.402093	0.643668
FBgn0036518	0.349298	0.643668
FBgn0038385	-0.3281	0.643668
FBgn0039114	-0.43376	0.643668
FBgn0053258	-0.417347	0.643668
FBgn0054026	-0.401389	0.643668
FBgn0011660	0.385159	0.64384
FBgn0043783	-0.408596	0.64384
FBgn0045866	-0.31028	0.64384
FBgn0086758	-0.4182	0.64384
FBgn0032934	0.416287	0.644266
FBgn0002863	-0.430927	0.64522
FBgn0032750	-0.413037	0.64522
FBgn0015001	-0.416331	0.645507
FBgn0035321	0.373333	0.645507
FBgn0039451	0.35303	0.645507
FBgn0000150	-0.257261	0.645673
FBgn0000659	-0.371823	0.645673
FBgn0003977	0.410148	0.645673
FBgn0005696	0.337189	0.645673
FBgn0011834	-0.422059	0.645673
FBgn0031834	-0.424606	0.645673
FBgn0053306	-0.419749	0.645673
FBgn0259170	0.411204	0.645673
FBgn0261786	0.353666	0.645673
FBgn0264541	-0.432378	0.646412
FBgn0053337	-0.432051	0.646877
FBgn0263236	0.325165	0.646877
FBgn0262730	0.34694	0.647104
FBgn0261556	-0.415312	0.6477
FBgn0027835	0.304323	0.648249
FBgn0035023	-0.42592	0.648249
FBgn0036842	0.378019	0.648249
FBgn0040324	0.378893	0.648249
FBgn0051233	-0.367024	0.648249
FBgn0267519	-0.410247	0.648249
FBgn0037181	-0.245294	0.648507
FBgn0000079	-0.357793	0.648975
FBgn0003517	-0.25526	0.648975
FBgn0029826	-0.3902	0.648975
FBgn0033806	0.413833	0.648975
FBgn0035636	-0.333004	0.648975
FBgn0037354	-0.313712	0.648975
FBgn0037515	0.430115	0.648975
FBgn0036104	0.409184	0.649368
FBgn0051548	-0.394298	0.649368
FBgn0052582	-0.341587	0.649368
FBgn0001225	-0.270331	0.64979
FBgn0032857	-0.346278	0.64979
FBgn0040347	0.371088	0.64979
FBgn0033464	-0.316334	0.650292
FBgn0034175	-0.355134	0.651146
FBgn0043530	-0.412974	0.651146
FBgn0051151	0.306407	0.651146
FBgn0004910	-0.420502	0.651197
FBgn0038428	0.333136	0.651197
FBgn0260634	0.337991	0.651197
FBgn0033968	-0.340475	0.652031
FBgn0039212	0.355414	0.652031
FBgn0020637	-0.258447	0.652429
FBgn0035154	-0.382338	0.652429
FBgn0036288	-0.420117	0.652429
FBgn0037252	0.372107	0.652429
FBgn0038738	0.3282	0.652429
FBgn0038769	0.42074	0.652429
FBgn0040078	0.329882	0.652429
FBgn0063495	-0.406475	0.652429
FBgn0034871	-0.366603	0.653931
FBgn0015925	0.316537	0.65397
FBgn0025186	0.362501	0.654488
FBgn0035755	-0.398496	0.655165
FBgn0034282	0.266061	0.65663
FBgn0038414	-0.417066	0.65663
FBgn0050438	0.403903	0.65663
FBgn0038745	0.350655	0.656758
FBgn0002577	-0.262185	0.657466
FBgn0003884	0.266373	0.657466
FBgn0004656	0.280097	0.657466
FBgn0036882	-0.348559	0.657466
FBgn0037724	-0.34916	0.657466
FBgn0040268	0.377355	0.657466
FBgn0040350	-0.424765	0.657466
FBgn0040931	-0.288751	0.657466
FBgn0050069	-0.422857	0.657466
FBgn0051342	0.366474	0.657466
FBgn0259113	0.350944	0.657466
FBgn0262531	-0.402416	0.657466
FBgn0265991	-0.425052	0.657466
FBgn0267727	0.262012	0.657914
FBgn0026207	0.358019	0.658036
FBgn0029905	0.312709	0.658036
FBgn0000578	0.324681	0.658204
FBgn0002413	0.271786	0.658204
FBgn0003300	-0.327951	0.658204
FBgn0010078	-0.256278	0.658204
FBgn0010109	-0.36602	0.658204
FBgn0014269	0.383605	0.658204
FBgn0015509	0.280533	0.658204
FBgn0015766	-0.397654	0.658204
FBgn0016685	0.264749	0.658204
FBgn0020299	-0.391599	0.658204
FBgn0022355	-0.389693	0.658204
FBgn0026077	-0.358341	0.658204
FBgn0026181	0.331682	0.658204
FBgn0026777	0.27948	0.658204
FBgn0027055	0.30682	0.658204
FBgn0027556	-0.348998	0.658204
FBgn0027608	-0.37389	0.658204
FBgn0028974	0.419799	0.658204
FBgn0030410	0.40275	0.658204
FBgn0030788	0.339508	0.658204
FBgn0031229	0.309854	0.658204
FBgn0031492	0.325289	0.658204
FBgn0031519	0.393128	0.658204
FBgn0031664	0.382102	0.658204
FBgn0033636	0.351131	0.658204
FBgn0036510	0.338138	0.658204
FBgn0036580	0.296665	0.658204
FBgn0037094	0.337001	0.658204
FBgn0037378	-0.352247	0.658204
FBgn0038353	-0.342018	0.658204
FBgn0038603	-0.37987	0.658204
FBgn0038701	-0.372118	0.658204
FBgn0038853	0.377728	0.658204
FBgn0038981	-0.381467	0.658204
FBgn0039303	0.378509	0.658204
FBgn0040950	-0.256473	0.658204
FBgn0043471	-0.362568	0.658204
FBgn0045862	0.34571	0.658204
FBgn0050090	-0.272911	0.658204
FBgn0051950	-0.392617	0.658204
FBgn0052656	-0.351303	0.658204
FBgn0069923	-0.27278	0.658204
FBgn0083961	0.338966	0.658204
FBgn0086365	-0.383445	0.658204
FBgn0261995	-0.319341	0.658204
FBgn0262582	0.357773	0.658204
FBgn0265974	0.378445	0.658204
FBgn0266431	-0.413153	0.658204
FBgn0270925	-0.360595	0.658204
FBgn0051463	-0.420481	0.658399
FBgn0004391	0.391304	0.658403
FBgn0015269	0.409254	0.658403
FBgn0030929	-0.344703	0.658403
FBgn0034877	-0.26942	0.658403
FBgn0035469	0.359157	0.658403
FBgn0036305	0.387399	0.658403
FBgn0037011	-0.395311	0.658403
FBgn0038220	0.315898	0.658403
FBgn0038700	-0.381993	0.658403
FBgn0038818	-0.235811	0.658403
FBgn0044511	-0.342582	0.658403
FBgn0000404	0.281867	0.659615
FBgn0011653	-0.27361	0.659615
FBgn0027507	0.303706	0.659615
FBgn0031871	0.298253	0.659615
FBgn0032172	0.344986	0.659615
FBgn0032726	-0.41661	0.659615
FBgn0034480	-0.351629	0.659615
FBgn0034965	-0.235503	0.659615
FBgn0036451	0.292301	0.659615
FBgn0036486	0.390143	0.659615
FBgn0039098	0.334709	0.659615
FBgn0039120	0.320193	0.659615
FBgn0040609	-0.358242	0.659615
FBgn0083968	-0.29453	0.659615
FBgn0086667	-0.417193	0.659615
FBgn0250816	0.387307	0.659615
FBgn0264273	-0.320252	0.659615
FBgn0000121	-0.38076	0.659827
FBgn0000382	0.356208	0.659827
FBgn0000541	0.317025	0.659827
FBgn0001624	0.327505	0.659827
FBgn0002526	-0.381265	0.659827
FBgn0002578	-0.366239	0.659827
FBgn0002579	-0.250587	0.659827
FBgn0010014	-0.306519	0.659827
FBgn0010223	-0.408184	0.659827
FBgn0015544	0.361869	0.659827
FBgn0017581	0.249281	0.659827
FBgn0022772	0.326989	0.659827
FBgn0024806	0.346724	0.659827
FBgn0026089	-0.314125	0.659827
FBgn0027580	-0.334896	0.659827
FBgn0027655	0.414764	0.659827
FBgn0029885	0.284891	0.659827
FBgn0031514	-0.408179	0.659827
FBgn0031637	-0.355574	0.659827
FBgn0031815	0.396538	0.659827
FBgn0032162	-0.370457	0.659827
FBgn0032519	-0.353257	0.659827
FBgn0033294	-0.394097	0.659827
FBgn0034331	-0.392068	0.659827
FBgn0034638	-0.39381	0.659827
FBgn0034662	-0.356947	0.659827
FBgn0034795	0.32042	0.659827
FBgn0035397	0.2867	0.659827
FBgn0035519	-0.350717	0.659827
FBgn0036726	-0.311425	0.659827
FBgn0036727	-0.414927	0.659827
FBgn0036825	-0.24776	0.659827
FBgn0037138	0.391616	0.659827
FBgn0037624	0.274922	0.659827
FBgn0038312	-0.397904	0.659827
FBgn0038601	0.354586	0.659827
FBgn0038829	0.326922	0.659827
FBgn0039450	0.31233	0.659827
FBgn0039452	-0.375829	0.659827
FBgn0044030	-0.327583	0.659827
FBgn0050360	-0.374091	0.659827
FBgn0051710	-0.409816	0.659827
FBgn0051855	0.331199	0.659827
FBgn0052266	-0.318382	0.659827
FBgn0053542	-0.4091	0.659827
FBgn0085353	-0.342136	0.659827
FBgn0259173	-0.412462	0.659827
FBgn0260439	0.296827	0.659827
FBgn0260655	0.39403	0.659827
FBgn0261260	-0.408265	0.659827
FBgn0264539	-0.230676	0.659827
FBgn0264987	-0.403368	0.659827
FBgn0283471	-0.397735	0.659827
FBgn0010747	0.34517	0.66011
FBgn0022338	0.276487	0.66011
FBgn0035056	-0.231529	0.66011
FBgn0037900	0.361323	0.66011
FBgn0034499	-0.229777	0.660311
FBgn0036717	-0.286687	0.660311
FBgn0000256	-0.3904	0.660393
FBgn0039305	0.31996	0.660393
FBgn0041604	0.348988	0.660393
FBgn0261799	-0.259246	0.660393
FBgn0264958	-0.33123	0.660393
FBgn0266758	-0.357552	0.660393
FBgn0003053	-0.344845	0.66145
FBgn0030520	0.262902	0.66145
FBgn0032088	-0.358038	0.66145
FBgn0033139	-0.394181	0.66145
FBgn0039342	-0.315647	0.66145
FBgn0042201	-0.412356	0.66145
FBgn0025697	-0.41184	0.661707
FBgn0032293	0.309815	0.662622
FBgn0260771	0.381118	0.662622
FBgn0001104	0.269244	0.664074
FBgn0001187	-0.393984	0.664074
FBgn0001325	-0.351201	0.664074
FBgn0002552	0.317095	0.664074
FBgn0003358	-0.359793	0.664074
FBgn0003390	-0.338058	0.664074
FBgn0017577	0.315183	0.664074
FBgn0026577	0.309447	0.664074
FBgn0029525	0.381952	0.664074
FBgn0030109	0.333975	0.664074
FBgn0031458	0.354481	0.664074
FBgn0034118	0.307099	0.664074
FBgn0034488	-0.301589	0.664074
FBgn0034734	0.402134	0.664074
FBgn0035159	0.283959	0.664074
FBgn0035271	0.315611	0.664074
FBgn0035781	-0.362611	0.664074
FBgn0037517	-0.376276	0.664074
FBgn0037541	0.382904	0.664074
FBgn0037560	-0.401888	0.664074
FBgn0037777	-0.387957	0.664074
FBgn0038233	0.409679	0.664074
FBgn0038662	-0.308683	0.664074
FBgn0051997	-0.409993	0.664074
FBgn0053181	0.26688	0.664074
FBgn0067779	0.390245	0.664074
FBgn0261277	-0.267142	0.664074
FBgn0261802	0.373248	0.664074
FBgn0264693	0.265059	0.664074
FBgn0265671	-0.344647	0.664074
FBgn0283682	0.379263	0.664074
FBgn0031652	-0.408565	0.664175
FBgn0036314	0.317885	0.664175
FBgn0003139	0.329767	0.664625
FBgn0003310	0.354555	0.664625
FBgn0014006	0.359587	0.664625
FBgn0022768	0.340648	0.664625
FBgn0028789	-0.339406	0.664625
FBgn0030774	-0.345405	0.664625
FBgn0030790	0.319048	0.664625
FBgn0030932	-0.25455	0.664625
FBgn0032665	-0.362448	0.664625
FBgn0033339	0.317171	0.664625
FBgn0033926	-0.326917	0.664625
FBgn0036239	0.296631	0.664625
FBgn0037485	-0.407444	0.664625
FBgn0039632	0.320975	0.664625
FBgn0039704	-0.24747	0.664625
FBgn0040397	0.336613	0.664625
FBgn0052687	-0.3857	0.664625
FBgn0259998	-0.343629	0.664625
FBgn0262952	-0.261761	0.664625
FBgn0265538	-0.407301	0.664625
FBgn0031002	-0.403822	0.664638
FBgn0262357	-0.350617	0.664801
FBgn0030294	0.366282	0.66493
FBgn0030431	-0.338876	0.665102
FBgn0002645	0.323115	0.665309
FBgn0015338	-0.295971	0.665309
FBgn0030148	-0.37357	0.665309
FBgn0030752	-0.319124	0.665309
FBgn0031868	0.349179	0.665309
FBgn0033589	-0.241181	0.665309
FBgn0033929	0.316832	0.665309
FBgn0035160	-0.388073	0.665309
FBgn0039323	-0.25986	0.665309
FBgn0039726	-0.358485	0.665309
FBgn0043470	-0.347647	0.665309
FBgn0051300	-0.404591	0.665309
FBgn0263979	0.390414	0.665309
FBgn0266579	-0.383852	0.665309
FBgn0000629	0.340241	0.665779
FBgn0003731	-0.383848	0.665779
FBgn0023395	0.37401	0.665779
FBgn0027586	-0.404271	0.665779
FBgn0028573	-0.243087	0.665779
FBgn0030234	-0.366814	0.665779
FBgn0030270	-0.354498	0.665779
FBgn0031294	-0.361146	0.665779
FBgn0031801	-0.382584	0.665779
FBgn0033301	-0.335451	0.665779
FBgn0034663	-0.340129	0.665779
FBgn0035181	-0.31398	0.665779
FBgn0037060	-0.309606	0.665779
FBgn0039873	-0.384382	0.665779
FBgn0039890	0.368572	0.665779
FBgn0041775	0.243691	0.665779
FBgn0050339	-0.396645	0.665779
FBgn0085261	-0.38299	0.665779
FBgn0260635	-0.30293	0.665779
FBgn0261266	0.370413	0.665779
FBgn0261508	-0.382275	0.665779
FBgn0261564	0.292461	0.665779
FBgn0261853	-0.403345	0.665779
FBgn0262881	-0.40393	0.665779
FBgn0264493	0.307417	0.665779
FBgn0267823	0.341602	0.665779
FBgn0024277	0.329515	0.666176
FBgn0052195	-0.337981	0.666176
FBgn0260987	0.28647	0.666176
FBgn0027579	0.354458	0.666305
FBgn0037279	-0.352235	0.666305
FBgn0021895	0.294741	0.666786
FBgn0030268	0.291652	0.666786
FBgn0032377	-0.375405	0.666786
FBgn0033661	0.382718	0.666786
FBgn0086443	-0.304336	0.666786
FBgn0003655	0.309118	0.667478
FBgn0015834	-0.266417	0.667478
FBgn0033307	-0.28442	0.667478
FBgn0034391	-0.257672	0.667478
FBgn0040290	0.347988	0.667478
FBgn0261549	-0.402089	0.667701
FBgn0001297	-0.334716	0.667805
FBgn0062961	-0.239333	0.667811
FBgn0014018	-0.308533	0.667898
FBgn0030502	0.305955	0.667935
FBgn0036974	0.279746	0.667935
FBgn0040623	0.286176	0.667935
FBgn0039312	-0.377109	0.66844
FBgn0037845	-0.371977	0.668846
FBgn0037146	-0.364139	0.668966
FBgn0002022	0.318118	0.670476
FBgn0011556	-0.370041	0.670476
FBgn0032223	0.351411	0.670476
[truncated: 15,423 more rows]

## Sheet: C. dl SCR vs dl SCR_Df
Gene	log2FoldChange	adjusted p-value
FBgn0035287	1.99233	1.35e-08
FBgn0031288	1.49294	0.000339411
FBgn0033381	1.42051	0.00151455
FBgn0052581	1.37476	0.00151455
FBgn0013685	1.18413	0.00538953
FBgn0046776	-1.28032	0.00538953
FBgn0013681	0.98583	0.183465
FBgn0034788	0.938394	0.20594
FBgn0036465	-1.06135	0.20594
FBgn0052214	0.977244	0.271858
FBgn0010602	0.808562	0.357951
FBgn0011642	0.836625	0.357951
FBgn0028408	0.802776	0.357951
FBgn0033979	-0.846839	0.357951
FBgn0037797	0.942071	0.357951
FBgn0039434	0.810922	0.627597
FBgn0004635	0.911448	0.826697
FBgn0039959	0.845601	0.826697
FBgn0003285	0.86762	0.940179
FBgn0027932	0.789375	0.940179
FBgn0040809	0.877631	0.940179
FBgn0003277	0.694437	0.953142
FBgn0010348	0.749141	0.953142
FBgn0266000	0.733187	0.953142
FBgn0003002	0.856408	0.994753
FBgn0030048	0.789084	0.994753
FBgn0261710	0.6979	0.994753
FBgn0000008	-0.164983	0.99864
FBgn0000014	0.15037	0.99864
FBgn0000015	0.153879	0.99864
FBgn0000017	0.528693	0.99864
FBgn0000018	-0.0271741	0.99864
FBgn0000022	0.0621969	0.99864
FBgn0000024	0.0215941	0.99864
FBgn0000028	0.0995555	0.99864
FBgn0000032	-0.176724	0.99864
FBgn0000036	0.100212	0.99864
FBgn0000037	-0.118475	0.99864
FBgn0000038	-0.0425894	0.99864
FBgn0000039	0.057404	0.99864
FBgn0000042	0.170054	0.99864
FBgn0000043	0.0692415	0.99864
FBgn0000044	0.170363	0.99864
FBgn0000045	-0.240859	0.99864
FBgn0000046	0.0542587	0.99864
FBgn0000047	-0.0632487	0.99864
FBgn0000052	-0.0294085	0.99864
FBgn0000053	-0.181638	0.99864
FBgn0000055	0.0956397	0.99864
FBgn0000057	-0.0565787	0.99864
FBgn0000061	0.0196234	0.99864
FBgn0000063	-0.0372915	0.99864
FBgn0000064	0.0378847	0.99864
FBgn0000071	0.474566	0.99864
FBgn0000075	-0.0627517	0.99864
FBgn0000077	-0.0275635	0.99864
FBgn0000078	-0.350307	0.99864
FBgn0000079	-0.242425	0.99864
FBgn0000083	-0.192208	0.99864
FBgn0000084	-0.119585	0.99864
FBgn0000092	-0.0365673	0.99864
FBgn0000094	-0.411178	0.99864
FBgn0000097	0.393764	0.99864
FBgn0000100	0.181903	0.99864
FBgn0000108	-0.015684	0.99864
FBgn0000109	0.100914	0.99864
FBgn0000114	0.0742913	0.99864
FBgn0000115	0.133552	0.99864
FBgn0000117	0.282239	0.99864
FBgn0000119	0.331449	0.99864
FBgn0000120	-0.297664	0.99864
FBgn0000121	-0.184377	0.99864
FBgn0000137	-0.0588498	0.99864
FBgn0000139	0.0880636	0.99864
FBgn0000140	0.197578	0.99864
FBgn0000146	-0.0882175	0.99864
FBgn0000147	0.0188531	0.99864
FBgn0000150	-0.137997	0.99864
FBgn0000152	-0.202352	0.99864
FBgn0000157	0.372454	0.99864
FBgn0000158	0.121314	0.99864
FBgn0000163	0.518559	0.99864
FBgn0000166	0.176009	0.99864
FBgn0000173	0.402137	0.99864
FBgn0000179	0.120987	0.99864
FBgn0000180	0.612231	0.99864
FBgn0000181	0.0526187	0.99864
FBgn0000183	0.247921	0.99864
FBgn0000206	-0.00726924	0.99864
FBgn0000212	0.340963	0.99864
FBgn0000216	0.714001	0.99864
FBgn0000221	0.200389	0.99864
FBgn0000227	0.25728	0.99864
FBgn0000228	0.407455	0.99864
FBgn0000229	-0.0766357	0.99864
FBgn0000233	0.199039	0.99864
FBgn0000239	0.44705	0.99864
FBgn0000241	0.0944223	0.99864
FBgn0000244	-0.249369	0.99864
FBgn0000246	0.407403	0.99864
FBgn0000247	-0.0866926	0.99864
FBgn0000250	0.214948	0.99864
FBgn0000251	-0.122125	0.99864
FBgn0000253	0.553215	0.99864
FBgn0000256	-0.182518	0.99864
FBgn0000257	-0.122308	0.99864
FBgn0000259	0.200253	0.99864
FBgn0000261	-0.308268	0.99864
FBgn0000273	0.564384	0.99864
FBgn0000274	-0.138163	0.99864
FBgn0000276	-0.234037	0.99864
FBgn0000277	0.144521	0.99864
FBgn0000278	-0.0832176	0.99864
FBgn0000279	-0.1612	0.99864
FBgn0000283	0.447416	0.99864
FBgn0000286	0.223158	0.99864
FBgn0000287	0.0728642	0.99864
FBgn0000289	-0.01974	0.99864
FBgn0000299	-0.0269747	0.99864
FBgn0000303	-0.10032	0.99864
FBgn0000307	0.433803	0.99864
FBgn0000308	0.498462	0.99864
FBgn0000316	0.290911	0.99864
FBgn0000317	0.284454	0.99864
FBgn0000318	0.102151	0.99864
FBgn0000319	0.476831	0.99864
FBgn0000320	0.00230865	0.99864
FBgn0000326	0.109152	0.99864
FBgn0000330	-0.0802573	0.99864
FBgn0000337	0.0371417	0.99864
FBgn0000339	0.104245	0.99864
FBgn0000346	-0.30426	0.99864
FBgn0000351	-0.257167	0.99864
FBgn0000352	0.345704	0.99864
FBgn0000355	-0.247524	0.99864
FBgn0000356	-0.0148275	0.99864
FBgn0000357	-0.0416385	0.99864
FBgn0000358	-0.0370612	0.99864
FBgn0000359	-0.0582533	0.99864
FBgn0000360	-0.0116082	0.99864
FBgn0000370	0.164002	0.99864
FBgn0000376	0.218095	0.99864
FBgn0000377	-0.0149527	0.99864
FBgn0000382	0.500476	0.99864
FBgn0000384	0.366791	0.99864
FBgn0000394	0.0209122	0.99864
FBgn0000395	-0.00861066	0.99864
FBgn0000404	0.325598	0.99864
FBgn0000405	0.389516	0.99864
FBgn0000406	-0.205733	0.99864
FBgn0000411	0.221506	0.99864
FBgn0000412	0.267148	0.99864
FBgn0000414	0.249125	0.99864
FBgn0000416	0.0519269	0.99864
FBgn0000422	-0.167065	0.99864
FBgn0000426	0.167281	0.99864
FBgn0000439	0.274165	0.99864
FBgn0000442	-0.35606	0.99864
FBgn0000447	-0.0629297	0.99864
FBgn0000448	-0.00910453	0.99864
FBgn0000449	0.467034	0.99864
FBgn0000451	-0.117722	0.99864
FBgn0000454	-0.0422566	0.99864
FBgn0000455	-0.152322	0.99864
FBgn0000459	0.544015	0.99864
FBgn0000463	0.780295	0.99864
FBgn0000464	-0.202078	0.99864
FBgn0000473	-0.136217	0.99864
FBgn0000477	0.0424733	0.99864
FBgn0000479	0.239789	0.99864
FBgn0000482	0.064272	0.99864
FBgn0000489	0.264735	0.99864
FBgn0000490	0.572277	0.99864
FBgn0000492	0.129129	0.99864
FBgn0000499	0.23834	0.99864
FBgn0000500	0.114736	0.99864
FBgn0000504	0.0579273	0.99864
FBgn0000520	0.054665	0.99864
FBgn0000524	0.0171892	0.99864
FBgn0000527	-0.0261415	0.99864
FBgn0000529	0.0156753	0.99864
FBgn0000533	0.293091	0.99864
FBgn0000535	0.0169107	0.99864
FBgn0000536	0.0881095	0.99864
FBgn0000541	0.302789	0.99864
FBgn0000542	0.488079	0.99864
FBgn0000543	0.0453587	0.99864
FBgn0000546	0.386969	0.99864
FBgn0000547	0.635977	0.99864
FBgn0000551	-0.0014406	0.99864
FBgn0000552	0.0156753	0.99864
FBgn0000557	0.0380974	0.99864
FBgn0000559	-0.0682888	0.99864
FBgn0000560	0.0156753	0.99864
FBgn0000562	0.0687398	0.99864
FBgn0000565	-0.0299522	0.99864
FBgn0000566	-0.0661648	0.99864
FBgn0000567	-0.122468	0.99864
FBgn0000568	-0.189186	0.99864
FBgn0000575	0.48689	0.99864
FBgn0000576	0.40719	0.99864
FBgn0000577	0.220616	0.99864
FBgn0000578	0.669095	0.99864
FBgn0000579	-0.200073	0.99864
FBgn0000581	0.415664	0.99864
FBgn0000588	-0.138454	0.99864
FBgn0000591	0.320905	0.99864
FBgn0000592	-0.141188	0.99864
FBgn0000606	0.290574	0.99864
FBgn0000611	0.266097	0.99864
FBgn0000615	-0.223791	0.99864
FBgn0000617	0.403101	0.99864
FBgn0000618	0.131203	0.99864
FBgn0000629	-0.0267945	0.99864
FBgn0000633	0.294518	0.99864
FBgn0000635	-0.118665	0.99864
FBgn0000636	-0.234002	0.99864
FBgn0000639	-0.0706559	0.99864
FBgn0000640	-0.0330116	0.99864
FBgn0000644	-0.0529915	0.99864
FBgn0000658	0.613937	0.99864
FBgn0000659	0.237235	0.99864
FBgn0000662	0.264133	0.99864
FBgn0000667	0.261762	0.99864
FBgn0000709	0.337334	0.99864
FBgn0000711	0.282351	0.99864
FBgn0000715	0.0156753	0.99864
FBgn0000719	0.514016	0.99864
FBgn0000721	0.621167	0.99864
FBgn0000723	0.0222924	0.99864
FBgn0000808	0.100995	0.99864
FBgn0000810	0.458281	0.99864
FBgn0000826	-0.0877688	0.99864
FBgn0000927	0.00583832	0.99864
FBgn0000928	0.0451941	0.99864
FBgn0000964	-0.10934	0.99864
FBgn0000996	0.168313	0.99864
FBgn0001075	0.525065	0.99864
FBgn0001077	0.284833	0.99864
FBgn0001078	0.400172	0.99864
FBgn0001079	0.101068	0.99864
FBgn0001083	0.0723736	0.99864
FBgn0001085	0.64109	0.99864
FBgn0001086	0.135956	0.99864
FBgn0001087	0.48346	0.99864
FBgn0001089	-0.24019	0.99864
FBgn0001090	0.337647	0.99864
FBgn0001091	-0.133235	0.99864
FBgn0001092	-0.11783	0.99864
FBgn0001098	-0.0672026	0.99864
FBgn0001099	0.0804439	0.99864
FBgn0001104	0.204298	0.99864
FBgn0001105	0.322212	0.99864
FBgn0001108	-0.0294281	0.99864
FBgn0001112	0.0691806	0.99864
FBgn0001114	-0.212565	0.99864
FBgn0001120	-0.444987	0.99864
FBgn0001122	0.486801	0.99864
FBgn0001123	0.487627	0.99864
FBgn0001124	0.0777965	0.99864
FBgn0001125	-0.213823	0.99864
FBgn0001128	-0.169676	0.99864
FBgn0001133	0.00753838	0.99864
FBgn0001137	0.125749	0.99864
FBgn0001138	0.334376	0.99864
FBgn0001139	0.293618	0.99864
FBgn0001142	0.0504212	0.99864
FBgn0001145	-0.346572	0.99864
FBgn0001147	0.0119323	0.99864
FBgn0001148	0.367181	0.99864
FBgn0001149	-0.434999	0.99864
FBgn0001150	0.224573	0.99864
FBgn0001168	-0.225266	0.99864
FBgn0001169	0.655661	0.99864
FBgn0001170	-0.0248383	0.99864
FBgn0001174	0.168122	0.99864
FBgn0001179	-0.0762711	0.99864
FBgn0001180	0.266546	0.99864
FBgn0001185	0.346414	0.99864
FBgn0001186	-0.0327815	0.99864
FBgn0001187	-0.336106	0.99864
FBgn0001189	-0.0314783	0.99864
FBgn0001197	0.279477	0.99864
FBgn0001202	0.227284	0.99864
FBgn0001206	-0.0142212	0.99864
FBgn0001208	-0.0126123	0.99864
FBgn0001215	0.160356	0.99864
FBgn0001216	0.0599393	0.99864
FBgn0001217	0.178616	0.99864
FBgn0001218	0.418744	0.99864
FBgn0001220	-0.406382	0.99864
FBgn0001222	0.107184	0.99864
FBgn0001224	-0.0961212	0.99864
FBgn0001225	-0.13016	0.99864
FBgn0001226	0.473854	0.99864
FBgn0001227	0.0287094	0.99864
FBgn0001229	-0.0600947	0.99864
FBgn0001230	-0.0492165	0.99864
FBgn0001233	-0.182537	0.99864
FBgn0001234	0.0718806	0.99864
FBgn0001235	0.322102	0.99864
FBgn0001248	-0.0605509	0.99864
FBgn0001250	0.0111686	0.99864
FBgn0001253	0.131494	0.99864
FBgn0001254	0.425893	0.99864
FBgn0001255	-0.0533449	0.99864
FBgn0001256	0.00804704	0.99864
FBgn0001257	-0.160685	0.99864
FBgn0001258	-0.172337	0.99864
FBgn0001259	0.0726769	0.99864
FBgn0001263	-0.0247868	0.99864
FBgn0001269	0.102822	0.99864
FBgn0001276	0.0535503	0.99864
FBgn0001280	0.0458824	0.99864
FBgn0001281	0.0964608	0.99864
FBgn0001285	-0.136651	0.99864
FBgn0001291	-0.178828	0.99864
FBgn0001296	-0.180972	0.99864
FBgn0001297	-0.2106	0.99864
FBgn0001301	0.15064	0.99864
FBgn0001308	0.0625791	0.99864
FBgn0001311	0.0156061	0.99864
FBgn0001313	-0.0200686	0.99864
FBgn0001316	0.337371	0.99864
FBgn0001319	-0.0918731	0.99864
FBgn0001320	0.336408	0.99864
FBgn0001321	-0.0531116	0.99864
FBgn0001323	0.393633	0.99864
FBgn0001324	0.113428	0.99864
FBgn0001325	0.28185	0.99864
FBgn0001330	0.31296	0.99864
FBgn0001341	0.253432	0.99864
FBgn0001404	0.0708268	0.99864
FBgn0001491	0.273992	0.99864
FBgn0001565	0.336429	0.99864
FBgn0001612	0.171641	0.99864
FBgn0001624	0.63166	0.99864
FBgn0001941	0.013144	0.99864
FBgn0001942	0.253133	0.99864
FBgn0001961	-0.0932107	0.99864
FBgn0001965	0.223955	0.99864
FBgn0001967	-0.0443555	0.99864
FBgn0001970	-0.175962	0.99864
FBgn0001974	0.24292	0.99864
FBgn0001977	-0.116547	0.99864
FBgn0001978	0.0318572	0.99864
FBgn0001981	0.0614311	0.99864
FBgn0001983	-0.0418279	0.99864
FBgn0001986	0.477917	0.99864
FBgn0001987	-0.16112	0.99864
FBgn0001989	0.081888	0.99864
FBgn0001990	0.104264	0.99864
FBgn0001991	0.102394	0.99864
FBgn0001992	-0.0643569	0.99864
FBgn0001994	0.429179	0.99864
FBgn0001995	0.144721	0.99864
FBgn0002021	0.0448745	0.99864
FBgn0002022	0.381895	0.99864
FBgn0002023	-0.184496	0.99864
FBgn0002031	-0.0190705	0.99864
FBgn0002036	-0.219603	0.99864
FBgn0002044	0.251667	0.99864
FBgn0002069	-0.21448	0.99864
FBgn0002121	-0.250329	0.99864
FBgn0002174	-0.0912322	0.99864
FBgn0002183	-0.0187927	0.99864
FBgn0002283	0.0511281	0.99864
FBgn0002284	0.137671	0.99864
FBgn0002306	0.256957	0.99864
FBgn0002354	0.502268	0.99864
FBgn0002413	0.48385	0.99864
FBgn0002431	0.302366	0.99864
FBgn0002441	-0.0887545	0.99864
FBgn0002466	0.539314	0.99864
FBgn0002521	0.531387	0.99864
FBgn0002522	-0.145158	0.99864
FBgn0002524	-0.0939612	0.99864
FBgn0002525	0.526622	0.99864
FBgn0002526	0.0650519	0.99864
FBgn0002531	-0.0200686	0.99864
FBgn0002534	-0.0241634	0.99864
FBgn0002535	0.036671	0.99864
FBgn0002542	0.126673	0.99864
FBgn0002543	0.221244	0.99864
FBgn0002552	0.081204	0.99864
FBgn0002561	0.283358	0.99864
FBgn0002562	-0.136432	0.99864
FBgn0002563	-0.145207	0.99864
FBgn0002564	0.127866	0.99864
FBgn0002565	0.0178397	0.99864
FBgn0002566	0.425235	0.99864
FBgn0002567	-0.113488	0.99864
FBgn0002569	-0.228568	0.99864
FBgn0002570	-0.258348	0.99864
FBgn0002571	-0.286758	0.99864
FBgn0002573	-0.139944	0.99864
FBgn0002576	-0.0200686	0.99864
FBgn0002577	-0.0800599	0.99864
FBgn0002578	-0.255695	0.99864
FBgn0002579	0.0130641	0.99864
FBgn0002590	-0.079167	0.99864
FBgn0002592	0.131431	0.99864
FBgn0002593	0.0235486	0.99864
FBgn0002607	0.168401	0.99864
FBgn0002609	0.0110918	0.99864
FBgn0002622	-0.0477329	0.99864
FBgn0002626	0.030171	0.99864
FBgn0002629	0.623782	0.99864
FBgn0002631	0.357768	0.99864
FBgn0002632	0.0390272	0.99864
FBgn0002633	0.590446	0.99864
FBgn0002638	0.065423	0.99864
FBgn0002641	-0.0207182	0.99864
FBgn0002643	0.436533	0.99864
FBgn0002645	0.649046	0.99864
FBgn0002673	0.206967	0.99864
FBgn0002707	-0.125047	0.99864
FBgn0002709	0.325476	0.99864
FBgn0002715	0.274447	0.99864
FBgn0002716	0.0532217	0.99864
FBgn0002719	0.218243	0.99864
FBgn0002723	-0.275752	0.99864
FBgn0002732	0.167692	0.99864
FBgn0002733	0.181977	0.99864
FBgn0002734	0.312951	0.99864
FBgn0002735	0.648066	0.99864
FBgn0002736	0.139672	0.99864
FBgn0002772	-0.0265007	0.99864
FBgn0002773	-0.255911	0.99864
FBgn0002774	0.127885	0.99864
FBgn0002775	0.0886957	0.99864
FBgn0002778	0.365021	0.99864
FBgn0002780	0.394384	0.99864
FBgn0002781	0.225534	0.99864
FBgn0002783	0.220726	0.99864
FBgn0002787	-0.231897	0.99864
FBgn0002789	-0.276595	0.99864
FBgn0002791	0.178515	0.99864
FBgn0002855	-0.0352383	0.99864
FBgn0002856	-0.0513398	0.99864
FBgn0002862	-0.289678	0.99864
FBgn0002863	-0.0567081	0.99864
FBgn0002865	-0.061851	0.99864
FBgn0002868	-0.37356	0.99864
FBgn0002869	-0.30415	0.99864
FBgn0002872	0.276777	0.99864
FBgn0002873	0.47953	0.99864
FBgn0002878	0.258639	0.99864
FBgn0002887	-0.2467	0.99864
FBgn0002891	-0.158937	0.99864
FBgn0002899	-0.0864427	0.99864
FBgn0002901	-0.288774	0.99864
FBgn0002905	-0.147941	0.99864
FBgn0002906	-0.0575953	0.99864
FBgn0002914	0.126193	0.99864
FBgn0002917	0.109116	0.99864
FBgn0002921	0.185339	0.99864
FBgn0002922	0.0156753	0.99864
FBgn0002924	0.246878	0.99864
FBgn0002926	-0.00164705	0.99864
FBgn0002930	-0.177909	0.99864
FBgn0002931	0.42451	0.99864
FBgn0002932	0.693122	0.99864
FBgn0002936	-0.0554896	0.99864
FBgn0002937	0.0156753	0.99864
FBgn0002938	-0.218032	0.99864
FBgn0002939	-0.0181049	0.99864
FBgn0002940	-0.310827	0.99864
FBgn0002941	0.0156753	0.99864
FBgn0002945	0.294778	0.99864
FBgn0002948	0.0153005	0.99864
FBgn0002962	-0.009015	0.99864
FBgn0002973	0.395563	0.99864
FBgn0002985	0.221865	0.99864
FBgn0002989	0.0452063	0.99864
FBgn0003008	0.00398027	0.99864
FBgn0003011	0.0315888	0.99864
FBgn0003015	-0.293858	0.99864
FBgn0003016	0.24391	0.99864
FBgn0003023	0.311138	0.99864
FBgn0003028	0.0838442	0.99864
FBgn0003034	-0.58616	0.99864
FBgn0003041	0.0800129	0.99864
FBgn0003042	0.0848031	0.99864
FBgn0003044	0.158822	0.99864
FBgn0003046	0.0317878	0.99864
FBgn0003048	0.678288	0.99864
FBgn0003053	-0.212617	0.99864
FBgn0003057	0.0156223	0.99864
FBgn0003060	-0.0412115	0.99864
FBgn0003062	0.0325322	0.99864
FBgn0003065	-0.0724963	0.99864
FBgn0003068	-0.123374	0.99864
FBgn0003071	-0.14607	0.99864
FBgn0003074	-0.363292	0.99864
FBgn0003076	0.0647307	0.99864
FBgn0003079	0.202115	0.99864
FBgn0003087	0.388731	0.99864
FBgn0003089	0.0906532	0.99864
FBgn0003090	0.043671	0.99864
FBgn0003091	-0.281522	0.99864
FBgn0003093	-0.108802	0.99864
FBgn0003114	0.016307	0.99864
FBgn0003117	0.121018	0.99864
FBgn0003118	-0.0563552	0.99864
FBgn0003124	0.185694	0.99864
FBgn0003130	-0.0200686	0.99864
FBgn0003132	0.00692058	0.99864
FBgn0003134	0.314349	0.99864
FBgn0003139	0.116513	0.99864
FBgn0003140	0.0317878	0.99864
FBgn0003141	0.0739662	0.99864
FBgn0003145	0.37133	0.99864
FBgn0003159	0.0703848	0.99864
FBgn0003162	-0.0774761	0.99864
FBgn0003165	0.687205	0.99864
FBgn0003169	0.361742	0.99864
FBgn0003174	0.0451941	0.99864
FBgn0003175	0.0642915	0.99864
FBgn0003187	0.145569	0.99864
FBgn0003189	0.199872	0.99864
FBgn0003204	-0.105721	0.99864
FBgn0003205	0.316997	0.99864
FBgn0003206	0.495004	0.99864
FBgn0003209	0.0607511	0.99864
FBgn0003210	0.0741119	0.99864
FBgn0003218	-0.275746	0.99864
FBgn0003227	-0.142692	0.99864
FBgn0003231	-0.13	0.99864
FBgn0003248	-0.0882906	0.99864
FBgn0003249	0.257921	0.99864
FBgn0003250	-0.0349781	0.99864
FBgn0003254	0.232485	0.99864
FBgn0003255	-0.00329896	0.99864
FBgn0003256	0.0153402	0.99864
FBgn0003257	0.134555	0.99864
FBgn0003261	0.095562	0.99864
FBgn0003268	-0.0475919	0.99864
FBgn0003270	-0.0699875	0.99864
FBgn0003274	0.156651	0.99864
FBgn0003275	0.0540526	0.99864
FBgn0003278	0.219929	0.99864
FBgn0003279	0.0931388	0.99864
FBgn0003292	-0.117047	0.99864
FBgn0003295	-0.0251991	0.99864
FBgn0003300	0.527405	0.99864
FBgn0003301	-0.324378	0.99864
FBgn0003302	0.0527841	0.99864
FBgn0003308	-0.0800216	0.99864
FBgn0003310	0.513347	0.99864
FBgn0003312	0.171902	0.99864
FBgn0003317	0.20542	0.99864
FBgn0003319	0.0156753	0.99864
FBgn0003321	0.0546155	0.99864
FBgn0003326	0.2883	0.99864
FBgn0003328	-0.256496	0.99864
FBgn0003330	0.192604	0.99864
FBgn0003334	-0.0221664	0.99864
FBgn0003339	0.0272258	0.99864
FBgn0003345	-0.254815	0.99864
FBgn0003346	0.181225	0.99864
FBgn0003353	-0.284913	0.99864
FBgn0003356	-0.304512	0.99864
FBgn0003357	-0.219392	0.99864
FBgn0003358	-0.286801	0.99864
FBgn0003360	-0.0368998	0.99864
FBgn0003371	0.445445	0.99864
FBgn0003373	-0.0365673	0.99864
FBgn0003377	-0.0896511	0.99864
FBgn0003380	-0.213933	0.99864
FBgn0003382	0.0151271	0.99864
FBgn0003386	-0.245179	0.99864
FBgn0003388	-0.197822	0.99864
FBgn0003390	-0.110015	0.99864
FBgn0003391	0.499503	0.99864
FBgn0003392	0.152695	0.99864
FBgn0003396	0.420559	0.99864
FBgn0003401	0.0397057	0.99864
FBgn0003410	0.43855	0.99864
FBgn0003411	0.0753342	0.99864
FBgn0003415	0.489717	0.99864
FBgn0003416	0.293257	0.99864
FBgn0003423	0.0563576	0.99864
FBgn0003429	-0.184083	0.99864
FBgn0003430	0.384416	0.99864
FBgn0003435	0.0871868	0.99864
FBgn0003444	0.626365	0.99864
FBgn0003447	0.499902	0.99864
FBgn0003448	0.820594	0.99864
FBgn0003449	0.216571	0.99864
FBgn0003450	0.21387	0.99864
FBgn0003459	0.355584	0.99864
FBgn0003460	-0.0691901	0.99864
FBgn0003462	-0.0774111	0.99864
FBgn0003463	0.269566	0.99864
FBgn0003464	-0.327127	0.99864
FBgn0003475	0.0899412	0.99864
FBgn0003479	-0.454153	0.99864
FBgn0003480	-0.156983	0.99864
FBgn0003482	-0.109188	0.99864
FBgn0003483	0.100276	0.99864
FBgn0003486	0.437933	0.99864
FBgn0003495	0.168775	0.99864
FBgn0003499	-0.0662248	0.99864
FBgn0003502	0.349984	0.99864
FBgn0003507	0.250084	0.99864
FBgn0003512	0.184246	0.99864
FBgn0003513	-0.0390884	0.99864
FBgn0003514	0.0509685	0.99864
FBgn0003515	-0.202993	0.99864
FBgn0003517	0.120604	0.99864
FBgn0003520	0.343537	0.99864
FBgn0003525	0.0773759	0.99864
FBgn0003527	-0.261381	0.99864
FBgn0003545	-0.135161	0.99864
FBgn0003557	0.0670944	0.99864
FBgn0003559	-0.103671	0.99864
FBgn0003567	0.596125	0.99864
FBgn0003575	-0.0660323	0.99864
FBgn0003598	0.370634	0.99864
FBgn0003607	0.474038	0.99864
FBgn0003612	0.0920557	0.99864
FBgn0003638	0.222938	0.99864
FBgn0003651	0.148991	0.99864
FBgn0003654	-0.0353607	0.99864
FBgn0003655	0.0499266	0.99864
FBgn0003656	0.247887	0.99864
FBgn0003660	-0.0941031	0.99864
FBgn0003676	-0.100176	0.99864
FBgn0003683	0.527188	0.99864
FBgn0003687	0.11211	0.99864
FBgn0003701	0.14248	0.99864
FBgn0003710	-0.0868198	0.99864
FBgn0003714	0.0901328	0.99864
FBgn0003716	0.397032	0.99864
FBgn0003719	0.39328	0.99864
FBgn0003720	0.198438	0.99864
FBgn0003721	0.283776	0.99864
FBgn0003731	0.801313	0.99864
FBgn0003733	0.0613086	0.99864
FBgn0003741	0.159681	0.99864
FBgn0003742	0.139906	0.99864
FBgn0003744	-0.0162446	0.99864
FBgn0003747	0.0492867	0.99864
FBgn0003748	-0.177407	0.99864
FBgn0003751	0.0776409	0.99864
FBgn0003861	-0.152079	0.99864
FBgn0003862	0.424145	0.99864
FBgn0003863	-0.284255	0.99864
FBgn0003865	0.148668	0.99864
FBgn0003866	0.16252	0.99864
FBgn0003867	0.0103602	0.99864
FBgn0003870	-0.0511568	0.99864
FBgn0003882	0.209301	0.99864
FBgn0003884	0.172367	0.99864
FBgn0003885	0.149802	0.99864
FBgn0003886	0.0156061	0.99864
FBgn0003888	-0.393458	0.99864
FBgn0003889	-0.284653	0.99864
FBgn0003890	-0.453379	0.99864
FBgn0003891	0.367785	0.99864
FBgn0003892	0.375187	0.99864
FBgn0003896	0.404241	0.99864
FBgn0003900	0.270109	0.99864
FBgn0003916	0.0682615	0.99864
FBgn0003920	-0.101262	0.99864
FBgn0003930	0.0120991	0.99864
FBgn0003931	0.0312667	0.99864
FBgn0003933	0.0156753	0.99864
FBgn0003934	-0.00175146	0.99864
FBgn0003935	0.0411259	0.99864
FBgn0003938	-0.00469498	0.99864
FBgn0003941	-0.0346744	0.99864
FBgn0003942	0.0829124	0.99864
FBgn0003943	-0.2916	0.99864
FBgn0003944	0.411118	0.99864
FBgn0003950	-0.195823	0.99864
FBgn0003961	-0.457117	0.99864
FBgn0003963	0.0704646	0.99864
FBgn0003964	-0.0504828	0.99864
FBgn0003965	-0.114971	0.99864
FBgn0003969	0.439603	0.99864
FBgn0003975	-0.011198	0.99864
FBgn0003977	0.0523019	0.99864
FBgn0003978	0.0405277	0.99864
FBgn0003979	-0.0494596	0.99864
FBgn0003980	-0.11522	0.99864
FBgn0003983	-0.102537	0.99864
FBgn0003984	0.574994	0.99864
FBgn0003996	-0.363094	0.99864
FBgn0003997	0.493929	0.99864
FBgn0004003	-0.0208781	0.99864
FBgn0004034	0.120817	0.99864
FBgn0004045	-0.211691	0.99864
FBgn0004047	-0.184578	0.99864
FBgn0004049	0.381245	0.99864
FBgn0004050	0.168087	0.99864
FBgn0004052	0.187269	0.99864
FBgn0004053	0.376872	0.99864
FBgn0004054	0.324067	0.99864
FBgn0004055	0.372389	0.99864
FBgn0004057	-0.0994525	0.99864
FBgn0004066	-0.0363856	0.99864
FBgn0004087	-0.401341	0.99864
FBgn0004101	-0.460745	0.99864
FBgn0004102	0.794376	0.99864
FBgn0004103	0.374991	0.99864
FBgn0004106	0.337064	0.99864
FBgn0004107	-0.0161855	0.99864
FBgn0004108	0.312628	0.99864
FBgn0004110	0.0921348	0.99864
FBgn0004117	-0.108813	0.99864
FBgn0004118	-0.0430789	0.99864
FBgn0004132	-0.0496534	0.99864
FBgn0004133	0.092787	0.99864
FBgn0004143	-0.26722	0.99864
FBgn0004167	-0.125748	0.99864
FBgn0004168	0.0156203	0.99864
FBgn0004169	-0.242683	0.99864
FBgn0004170	-0.0537205	0.99864
FBgn0004171	-0.0781831	0.99864
FBgn0004172	-0.0765992	0.99864
FBgn0004173	-0.0845727	0.99864
FBgn0004174	0.132869	0.99864
FBgn0004175	0.0353535	0.99864
FBgn0004177	0.464273	0.99864
FBgn0004179	0.110439	0.99864
FBgn0004181	-0.328953	0.99864
FBgn0004183	-0.00678996	0.99864
FBgn0004185	-0.0712039	0.99864
FBgn0004186	-0.0105279	0.99864
FBgn0004187	0.0134299	0.99864
FBgn0004188	-0.0200686	0.99864
FBgn0004189	0.0727638	0.99864
FBgn0004190	-0.0508164	0.99864
FBgn0004191	-0.157376	0.99864
FBgn0004192	-0.180875	0.99864
FBgn0004197	0.0868226	0.99864
FBgn0004198	-0.0129998	0.99864
FBgn0004227	0.345711	0.99864
FBgn0004228	-0.316482	0.99864
FBgn0004237	0.268318	0.99864
FBgn0004240	-0.425315	0.99864
FBgn0004242	-0.10967	0.99864
FBgn0004244	-0.13254	0.99864
FBgn0004359	0.238761	0.99864
FBgn0004360	-0.00896189	0.99864
FBgn0004362	0.425747	0.99864
FBgn0004363	0.0490205	0.99864
FBgn0004364	0.586193	0.99864
FBgn0004367	-0.220917	0.99864
FBgn0004368	0.144932	0.99864
FBgn0004369	0.0633449	0.99864
FBgn0004370	0.227508	0.99864
FBgn0004372	0.0156753	0.99864
FBgn0004373	0.504938	0.99864
FBgn0004374	0.157389	0.99864
FBgn0004378	0.203667	0.99864
FBgn0004379	0.206895	0.99864
FBgn0004380	-0.1089	0.99864
FBgn0004381	-0.233214	0.99864
FBgn0004387	0.100972	0.99864
FBgn0004389	0.0494202	0.99864
FBgn0004390	0.319237	0.99864
FBgn0004391	0.21251	0.99864
FBgn0004394	0.0841634	0.99864
FBgn0004395	0.32918	0.99864
FBgn0004396	-0.245511	0.99864
FBgn0004397	0.138313	0.99864
FBgn0004400	0.163895	0.99864
FBgn0004401	0.390584	0.99864
FBgn0004403	-0.0691055	0.99864
FBgn0004404	0.0939752	0.99864
FBgn0004406	0.0439947	0.99864
FBgn0004414	-0.260898	0.99864
FBgn0004419	0.255619	0.99864
FBgn0004425	-0.0458869	0.99864
FBgn0004426	-0.161008	0.99864
FBgn0004427	-0.182956	0.99864
FBgn0004428	-0.101579	0.99864
FBgn0004429	-0.0253511	0.99864
FBgn0004430	-0.407058	0.99864
FBgn0004431	-0.0512042	0.99864
FBgn0004432	-0.173156	0.99864
FBgn0004435	0.0797919	0.99864
FBgn0004436	-0.0107135	0.99864
FBgn0004449	0.335895	0.99864
FBgn0004456	0.277657	0.99864
FBgn0004463	0.0148584	0.99864
FBgn0004465	-0.16794	0.99864
FBgn0004507	-0.0457708	0.99864
FBgn0004509	0.0424247	0.99864
FBgn0004510	-0.141957	0.99864
FBgn0004511	-0.125229	0.99864
FBgn0004512	-0.0582522	0.99864
FBgn0004513	0.0134243	0.99864
FBgn0004514	0.0156753	0.99864
FBgn0004516	-0.00175146	0.99864
FBgn0004552	-0.0304277	0.99864
FBgn0004554	0.0177144	0.99864
FBgn0004556	0.202623	0.99864
FBgn0004567	0.235416	0.99864
FBgn0004569	0.525552	0.99864
FBgn0004573	-0.0678849	0.99864
FBgn0004574	0.0489729	0.99864
FBgn0004575	-0.0175512	0.99864
FBgn0004580	-0.312404	0.99864
FBgn0004581	0.044244	0.99864
FBgn0004583	-0.236248	0.99864
FBgn0004584	0.0865688	0.99864
FBgn0004587	0.192577	0.99864
FBgn0004588	-0.0200686	0.99864
FBgn0004591	-0.0388298	0.99864
FBgn0004595	0.0753272	0.99864
FBgn0004597	0.119482	0.99864
FBgn0004598	0.320543	0.99864
FBgn0004606	-0.0645592	0.99864
FBgn0004607	0.313525	0.99864
FBgn0004611	0.056348	0.99864
FBgn0004618	-0.0442211	0.99864
FBgn0004620	0.0723771	0.99864
FBgn0004622	0.0156753	0.99864
FBgn0004623	0.137299	0.99864
FBgn0004629	0.186238	0.99864
FBgn0004636	0.330937	0.99864
FBgn0004638	0.313512	0.99864
FBgn0004643	-0.220766	0.99864
FBgn0004644	-0.0333549	0.99864
FBgn0004646	0.758999	0.99864
FBgn0004647	0.28245	0.99864
FBgn0004648	0.274236	0.99864
FBgn0004649	-0.409549	0.99864
FBgn0004650	-0.290838	0.99864
FBgn0004652	-0.31879	0.99864
FBgn0004654	-0.21346	0.99864
FBgn0004655	0.290517	0.99864
FBgn0004656	0.418139	0.99864
FBgn0004657	0.128208	0.99864
FBgn0004666	0.208692	0.99864
FBgn0004687	0.0690624	0.99864
FBgn0004698	0.274915	0.99864
FBgn0004777	0.113139	0.99864
FBgn0004779	0.0340227	0.99864
FBgn0004780	0.0156753	0.99864
FBgn0004781	0.0315888	0.99864
FBgn0004782	0.0340227	0.99864
FBgn0004783	0.0156753	0.99864
FBgn0004784	0.050792	0.99864
FBgn0004795	0.516623	0.99864
FBgn0004797	0.168126	0.99864
FBgn0004811	0.116684	0.99864
FBgn0004828	0.21707	0.99864
FBgn0004832	-0.353687	0.99864
FBgn0004837	0.318601	0.99864
FBgn0004838	0.532899	0.99864
FBgn0004839	0.00903177	0.99864
FBgn0004841	-0.0520365	0.99864
FBgn0004842	-0.00726924	0.99864
FBgn0004852	-0.242321	0.99864
FBgn0004854	0.0156753	0.99864
FBgn0004855	0.15308	0.99864
FBgn0004856	0.219936	0.99864
FBgn0004858	-0.132526	0.99864
FBgn0004859	0.709741	0.99864
FBgn0004860	0.17491	0.99864
FBgn0004861	0.573413	0.99864
FBgn0004862	0.134274	0.99864
FBgn0004863	0.0312385	0.99864
FBgn0004864	0.0962793	0.99864
FBgn0004865	-0.046528	0.99864
FBgn0004867	0.0753686	0.99864
FBgn0004868	0.210089	0.99864
FBgn0004870	0.0141251	0.99864
FBgn0004872	0.0820443	0.99864
FBgn0004875	0.296346	0.99864
FBgn0004876	-0.0449907	0.99864
FBgn0004878	0.413113	0.99864
FBgn0004880	0.131798	0.99864
FBgn0004882	0.051848	0.99864
FBgn0004885	0.276142	0.99864
FBgn0004888	0.00796534	0.99864
FBgn0004889	0.210274	0.99864
FBgn0004892	0.0646643	0.99864
FBgn0004893	0.0383989	0.99864
FBgn0004895	0.0317878	0.99864
FBgn0004896	-0.0910277	0.99864
FBgn0004898	-0.0503275	0.99864
FBgn0004901	0.0509216	0.99864
FBgn0004903	0.0253874	0.99864
FBgn0004907	0.0839406	0.99864
FBgn0004908	0.230505	0.99864
FBgn0004910	-0.222223	0.99864
FBgn0004911	-0.078916	0.99864
FBgn0004913	-0.182526	0.99864
FBgn0004914	-0.0602326	0.99864
FBgn0004915	-0.029518	0.99864
FBgn0004919	-0.0447841	0.99864
FBgn0004921	0.194877	0.99864
FBgn0004924	0.622834	0.99864
FBgn0004926	-0.0310085	0.99864
FBgn0004956	0.267938	0.99864
FBgn0004959	0.248422	0.99864
FBgn0005198	-0.170157	0.99864
FBgn0005278	0.238849	0.99864
FBgn0005322	0.233777	0.99864
FBgn0005355	0.092698	0.99864
FBgn0005386	0.573223	0.99864
FBgn0005390	-0.357724	0.99864
FBgn0005391	-0.292404	0.99864
FBgn0005411	0.153053	0.99864
FBgn0005427	0.1581	0.99864
FBgn0005533	0.0108487	0.99864
FBgn0005536	0.00496068	0.99864
FBgn0005558	0.172004	0.99864
FBgn0005561	0.0541467	0.99864
FBgn0005564	0.0235214	0.99864
FBgn0005585	-0.180583	0.99864
FBgn0005586	0.0990499	0.99864
FBgn0005590	0.130266	0.99864
FBgn0005592	0.0861996	0.99864
FBgn0005593	-0.0722975	0.99864
FBgn0005596	0.0343615	0.99864
FBgn0005612	-0.0887832	0.99864
FBgn0005614	-0.22207	0.99864
FBgn0005616	0.192788	0.99864
FBgn0005617	0.109526	0.99864
FBgn0005619	0.0390552	0.99864
FBgn0005624	0.479672	0.99864
FBgn0005626	0.131264	0.99864
FBgn0005631	0.1717	0.99864
FBgn0005632	0.246436	0.99864
FBgn0005633	-0.02801	0.99864
FBgn0005636	0.0174709	0.99864
FBgn0005638	-0.243201	0.99864
FBgn0005640	0.316033	0.99864
FBgn0005642	-0.0445343	0.99864
FBgn0005648	0.384661	0.99864
FBgn0005649	0.37471	0.99864
FBgn0005655	0.329878	0.99864
FBgn0005658	-0.00393771	0.99864
FBgn0005659	-0.150766	0.99864
FBgn0005660	-0.158866	0.99864
FBgn0005664	-0.276203	0.99864
FBgn0005666	-0.083296	0.99864
FBgn0005670	0.00718083	0.99864
FBgn0005671	-0.141658	0.99864
FBgn0005672	0.215361	0.99864
FBgn0005674	-0.0652071	0.99864
FBgn0005677	-0.0903179	0.99864
FBgn0005683	-0.425697	0.99864
FBgn0005694	0.380502	0.99864
FBgn0005695	0.286907	0.99864
FBgn0005696	-0.338422	0.99864
FBgn0005771	0.391619	0.99864
FBgn0005775	0.179375	0.99864
FBgn0005777	0.175349	0.99864
FBgn0005778	-0.0200686	0.99864
FBgn0008635	-0.296079	0.99864
FBgn0008636	0.35036	0.99864
FBgn0008646	-0.0743626	0.99864
FBgn0010014	0.0576836	0.99864
FBgn0010015	-0.078596	0.99864
FBgn0010019	-0.439593	0.99864
FBgn0010038	-0.330786	0.99864
FBgn0010039	-0.455466	0.99864
FBgn0010040	0.0100827	0.99864
FBgn0010041	-0.135155	0.99864
FBgn0010042	-0.0110492	0.99864
FBgn0010043	-0.295499	0.99864
FBgn0010044	-0.0774118	0.99864
FBgn0010051	-0.00727173	0.99864
FBgn0010052	0.32901	0.99864
FBgn0010053	0.0302541	0.99864
FBgn0010078	0.209478	0.99864
FBgn0010097	-0.187446	0.99864
FBgn0010100	0.169116	0.99864
FBgn0010105	0.570229	0.99864
FBgn0010109	0.33048	0.99864
FBgn0010113	0.299166	0.99864
FBgn0010114	-0.169305	0.99864
FBgn0010173	-0.291482	0.99864
FBgn0010194	0.579333	0.99864
FBgn0010198	0.0577414	0.99864
FBgn0010213	-0.0588805	0.99864
FBgn0010215	0.558592	0.99864
FBgn0010217	-0.159461	0.99864
FBgn0010220	0.029082	0.99864
FBgn0010222	-0.138032	0.99864
FBgn0010223	-0.123059	0.99864
FBgn0010225	-0.401117	0.99864
FBgn0010226	0.144444	0.99864
FBgn0010228	0.496354	0.99864
FBgn0010235	-0.0203994	0.99864
FBgn0010238	0.748431	0.99864
FBgn0010240	-0.0323098	0.99864
FBgn0010241	-0.43829	0.99864
FBgn0010246	-0.303494	0.99864
FBgn0010247	0.306494	0.99864
FBgn0010258	0.0723771	0.99864
FBgn0010263	-0.173984	0.99864
FBgn0010265	0.0655125	0.99864
FBgn0010269	-0.168563	0.99864
FBgn0010278	-0.119663	0.99864
FBgn0010280	0.308295	0.99864
FBgn0010282	0.496272	0.99864
FBgn0010287	0.753401	0.99864
FBgn0010288	-0.281312	0.99864
FBgn0010292	-0.0442921	0.99864
FBgn0010300	0.402313	0.99864
FBgn0010303	0.21625	0.99864
FBgn0010309	0.128928	0.99864
FBgn0010313	0.380362	0.99864
FBgn0010314	-0.0409304	0.99864
FBgn0010315	0.227327	0.99864
FBgn0010316	0.159051	0.99864
FBgn0010317	0.252195	0.99864
FBgn0010323	0.0845883	0.99864
FBgn0010328	0.128873	0.99864
FBgn0010333	0.295606	0.99864
FBgn0010339	0.00783572	0.99864
FBgn0010340	-0.13931	0.99864
FBgn0010341	0.291217	0.99864
FBgn0010342	0.223826	0.99864
FBgn0010350	0.124887	0.99864
FBgn0010352	0.0391973	0.99864
FBgn0010355	0.0408037	0.99864
FBgn0010356	0.0836781	0.99864
FBgn0010357	-0.368915	0.99864
FBgn0010358	-0.177552	0.99864
FBgn0010379	0.191697	0.99864
FBgn0010380	-0.00450437	0.99864
FBgn0010382	0.170852	0.99864
FBgn0010383	0.219904	0.99864
FBgn0010385	-0.156943	0.99864
FBgn0010387	-0.269448	0.99864
FBgn0010388	-0.458657	0.99864
FBgn0010389	0.334611	0.99864
FBgn0010391	-0.246046	0.99864
FBgn0010395	-0.020579	0.99864
FBgn0010397	-0.156043	0.99864
FBgn0010398	-0.103609	0.99864
FBgn0010401	0.10164	0.99864
FBgn0010403	-0.104205	0.99864
FBgn0010406	0.456937	0.99864
FBgn0010407	-0.00658136	0.99864
FBgn0010408	-0.130954	0.99864
FBgn0010409	0.0341021	0.99864
FBgn0010411	-0.0265365	0.99864
FBgn0010412	-0.110777	0.99864
FBgn0010415	0.0789904	0.99864
FBgn0010416	0.763178	0.99864
FBgn0010417	0.0547769	0.99864
FBgn0010421	-0.00603575	0.99864
FBgn0010422	0.164484	0.99864
FBgn0010423	-0.0149433	0.99864
FBgn0010424	-0.338341	0.99864
FBgn0010425	-0.290775	0.99864
FBgn0010431	-0.162531	0.99864
FBgn0010433	0.129278	0.99864
FBgn0010434	-0.203685	0.99864
FBgn0010435	-0.168928	0.99864
FBgn0010438	-0.47591	0.99864
FBgn0010441	-0.106765	0.99864
FBgn0010452	0.467826	0.99864
FBgn0010453	0.330394	0.99864
FBgn0010470	-0.199547	0.99864
FBgn0010473	0.447374	0.99864
FBgn0010482	-0.26509	0.99864
FBgn0010488	0.228264	0.99864
FBgn0010497	-0.423234	0.99864
FBgn0010501	0.280862	0.99864
FBgn0010504	0.0322584	0.99864
FBgn0010516	0.00849941	0.99864
FBgn0010520	0.112426	0.99864
FBgn0010531	-0.612018	0.99864
FBgn0010548	0.159591	0.99864
FBgn0010549	-0.198694	0.99864
FBgn0010551	-0.268849	0.99864
FBgn0010575	0.378676	0.99864
FBgn0010583	0.103011	0.99864
FBgn0010590	0.192585	0.99864
FBgn0010591	-0.223883	0.99864
FBgn0010607	0.102772	0.99864
FBgn0010611	-0.150404	0.99864
FBgn0010612	0.11435	0.99864
FBgn0010620	0.0632469	0.99864
FBgn0010621	-0.159446	0.99864
FBgn0010622	0.0302702	0.99864
FBgn0010638	0.466127	0.99864
FBgn0010651	-0.299351	0.99864
FBgn0010660	0.184283	0.99864
FBgn0010741	0.0840725	0.99864
FBgn0010747	0.136524	0.99864
FBgn0010750	0.322979	0.99864
FBgn0010762	0.364434	0.99864
FBgn0010768	0.0559114	0.99864
FBgn0010770	0.180393	0.99864
FBgn0010772	0.143936	0.99864
FBgn0010774	0.268527	0.99864
FBgn0010786	-0.248977	0.99864
FBgn0010803	-0.0139361	0.99864
FBgn0010808	0.199469	0.99864
FBgn0010812	-0.151061	0.99864
FBgn0010825	0.286145	0.99864
FBgn0010830	-0.342369	0.99864
FBgn0010877	0.231001	0.99864
FBgn0010894	0.349658	0.99864
FBgn0010905	0.367169	0.99864
FBgn0010909	0.246366	0.99864
FBgn0010926	0.540453	0.99864
FBgn0011016	0.0918398	0.99864
FBgn0011020	0.229677	0.99864
FBgn0011202	-0.0908836	0.99864
FBgn0011204	0.417988	0.99864
FBgn0011205	-0.145795	0.99864
FBgn0011206	0.00738397	0.99864
FBgn0011211	-0.0688226	0.99864
FBgn0011217	0.248292	0.99864
FBgn0011224	0.330728	0.99864
FBgn0011225	-0.0524912	0.99864
FBgn0011227	-0.0736869	0.99864
FBgn0011230	0.0453316	0.99864
FBgn0011232	-0.0920209	0.99864
FBgn0011236	-0.310802	0.99864
FBgn0011239	-0.0108512	0.99864
FBgn0011241	0.176982	0.99864
FBgn0011244	-0.284042	0.99864
FBgn0011259	0.23532	0.99864
FBgn0011260	0.426494	0.99864
FBgn0011270	-0.0261415	0.99864
FBgn0011272	-0.00938878	0.99864
FBgn0011274	-0.146825	0.99864
FBgn0011279	0.0945924	0.99864
FBgn0011280	-0.249977	0.99864
FBgn0011281	-0.0726219	0.99864
FBgn0011282	-0.0281919	0.99864
FBgn0011283	0.0127916	0.99864
FBgn0011284	0.104292	0.99864
FBgn0011286	-0.21863	0.99864
FBgn0011288	-0.0204821	0.99864
FBgn0011289	0.0299948	0.99864
FBgn0011290	0.0673212	0.99864
FBgn0011291	0.127493	0.99864
FBgn0011293	-0.447068	0.99864
FBgn0011294	-0.00737463	0.99864
FBgn0011296	-0.17898	0.99864
FBgn0011297	-0.306088	0.99864
FBgn0011300	0.191861	0.99864
FBgn0011305	0.124907	0.99864
FBgn0011327	0.360698	0.99864
FBgn0011335	-0.150976	0.99864
FBgn0011336	0.26268	0.99864
FBgn0011361	-0.172332	0.99864
FBgn0011455	0.178948	0.99864
FBgn0011474	0.339653	0.99864
FBgn0011476	-0.124314	0.99864
FBgn0011481	0.43203	0.99864
FBgn0011509	0.186017	0.99864
FBgn0011554	-0.491713	0.99864
FBgn0011555	-0.284706	0.99864
FBgn0011556	-0.33745	0.99864
FBgn0011559	0.168172	0.99864
FBgn0011566	-0.251018	0.99864
FBgn0011570	-0.169452	0.99864
FBgn0011571	0.689897	0.99864
FBgn0011573	0.130175	0.99864
FBgn0011576	-0.318453	0.99864
FBgn0011581	-0.0703585	0.99864
FBgn0011582	-0.100056	0.99864
FBgn0011584	0.10601	0.99864
FBgn0011586	0.680085	0.99864
FBgn0011591	-0.0402153	0.99864
FBgn0011592	0.201523	0.99864
FBgn0011596	-0.181472	0.99864
FBgn0011603	-0.166597	0.99864
FBgn0011604	0.27976	0.99864
FBgn0011606	-0.055851	0.99864
FBgn0011638	-0.395547	0.99864
FBgn0011640	0.269943	0.99864
FBgn0011648	0.256682	0.99864
FBgn0011653	0.165504	0.99864
FBgn0011655	-0.0127066	0.99864
FBgn0011656	0.00465619	0.99864
FBgn0011659	0.0544203	0.99864
FBgn0011661	0.072396	0.99864
FBgn0011666	0.483721	0.99864
FBgn0011668	-0.390533	0.99864
FBgn0011669	-0.207642	0.99864
FBgn0011670	0.00890463	0.99864
FBgn0011672	0.048093	0.99864
FBgn0011674	-0.0755808	0.99864
FBgn0011692	0.0508013	0.99864
FBgn0011693	-0.244273	0.99864
FBgn0011694	-0.620856	0.99864
FBgn0011695	-0.276361	0.99864
FBgn0011701	-0.0567462	0.99864
FBgn0011703	-0.149775	0.99864
FBgn0011704	-0.151043	0.99864
FBgn0011705	0.270225	0.99864
FBgn0011706	0.153528	0.99864
FBgn0011708	-0.100298	0.99864
FBgn0011710	0.179016	0.99864
FBgn0011715	0.0258782	0.99864
FBgn0011722	-0.0322454	0.99864
FBgn0011723	0.146218	0.99864
FBgn0011725	0.0484925	0.99864
FBgn0011726	-0.00907667	0.99864
FBgn0011737	0.16699	0.99864
FBgn0011739	0.339099	0.99864
FBgn0011740	-0.036902	0.99864
FBgn0011741	0.0242047	0.99864
FBgn0011742	0.334729	0.99864
FBgn0011743	-0.0259983	0.99864
FBgn0011745	-0.325362	0.99864
FBgn0011746	0.21785	0.99864
FBgn0011747	0.354853	0.99864
FBgn0011754	0.136577	0.99864
FBgn0011758	-0.0225302	0.99864
FBgn0011760	0.45517	0.99864
FBgn0011761	-0.0587708	0.99864
FBgn0011762	0.125123	0.99864
FBgn0011763	0.205457	0.99864
FBgn0011766	0.644215	0.99864
FBgn0011768	-0.266589	0.99864
FBgn0011769	0.115205	0.99864
FBgn0011770	0.117225	0.99864
FBgn0011771	0.00672282	0.99864
FBgn0011774	-0.110691	0.99864
FBgn0011785	0.348481	0.99864
FBgn0011787	-0.0256816	0.99864
FBgn0011802	0.122604	0.99864
FBgn0011817	0.478745	0.99864
FBgn0011822	-0.364115	0.99864
FBgn0011824	0.267631	0.99864
FBgn0011826	0.171211	0.99864
FBgn0011829	-0.0014406	0.99864
FBgn0011834	-0.192671	0.99864
FBgn0011836	0.408169	0.99864
FBgn0011837	0.15734	0.99864
FBgn0011849	0.0156753	0.99864
FBgn0011863	0.0156753	0.99864
FBgn0011872	-0.0200686	0.99864
FBgn0011877	0.0560983	0.99864
FBgn0011879	0.0590121	0.99864
FBgn0011880	0.0156061	0.99864
FBgn0011884	0.029892	0.99864
FBgn0011887	0.0317878	0.99864
FBgn0011889	-0.0225302	0.99864
FBgn0011890	0.093733	0.99864
FBgn0011891	-0.0200686	0.99864
FBgn0011893	-0.00329896	0.99864
FBgn0011896	0.0177144	0.99864
FBgn0011897	-0.109924	0.99864
FBgn0011909	0.0156753	0.99864
FBgn0011910	-0.0207188	0.99864
FBgn0011927	0.0156753	0.99864
FBgn0011937	0.0156753	0.99864
FBgn0011958	-0.0207188	0.99864
FBgn0011974	0.0156753	0.99864
FBgn0011975	0.0340227	0.99864
FBgn0011981	0.0451941	0.99864
FBgn0011982	-0.0111882	0.99864
FBgn0011987	0.0451941	0.99864
FBgn0011994	0.0156753	0.99864
FBgn0012002	-0.0200686	0.99864
FBgn0012024	-0.0200686	0.99864
FBgn0012025	0.0156753	0.99864
FBgn0012034	-0.328211	0.99864
FBgn0012036	-0.305719	0.99864
FBgn0012037	-0.117705	0.99864
FBgn0012042	-0.133112	0.99864
FBgn0012051	0.0447329	0.99864
FBgn0012058	0.377573	0.99864
FBgn0012344	-0.0970415	0.99864
FBgn0013263	0.346576	0.99864
FBgn0013269	0.127794	0.99864
FBgn0013272	-0.0671142	0.99864
FBgn0013275	0.0317878	0.99864
FBgn0013276	0.105016	0.99864
FBgn0013278	0.0617758	0.99864
FBgn0013279	0.0538944	0.99864
FBgn0013300	-0.00578017	0.99864
FBgn0013301	-0.0712039	0.99864
FBgn0013303	0.372534	0.99864
FBgn0013305	0.158457	0.99864
FBgn0013307	-0.0753883	0.99864
FBgn0013308	0.0156753	0.99864
FBgn0013323	0.12992	0.99864
FBgn0013325	-0.110117	0.99864
FBgn0013334	0.114108	0.99864
FBgn0013342	-0.113531	0.99864
FBgn0013343	0.324889	0.99864
FBgn0013347	0.170023	0.99864
FBgn0013348	-0.116695	0.99864
FBgn0013432	0.20026	0.99864
FBgn0013433	0.10785	0.99864
FBgn0013435	0.0659829	0.99864
FBgn0013467	-0.115029	0.99864
FBgn0013469	-0.00474547	0.99864
FBgn0013531	-0.23486	0.99864
FBgn0013548	-0.203224	0.99864
FBgn0013563	0.111126	0.99864
FBgn0013576	0.0206875	0.99864
FBgn0013672	0.375942	0.99864
FBgn0013673	0.440154	0.99864
FBgn0013674	0.258744	0.99864
FBgn0013675	0.391125	0.99864
FBgn0013676	0.458829	0.99864
FBgn0013678	0.579825	0.99864
FBgn0013679	0.404567	0.99864
FBgn0013680	0.488265	0.99864
FBgn0013683	0.34064	0.99864
FBgn0013684	0.518977	0.99864
FBgn0013686	0.430179	0.99864
FBgn0013688	0.400951	0.99864
FBgn0013689	0.520157	0.99864
FBgn0013690	0.447038	0.99864
FBgn0013692	0.0174663	0.99864
FBgn0013693	0.111475	0.99864
FBgn0013694	0.105819	0.99864
FBgn0013695	0.470114	0.99864
FBgn0013696	0.2303	0.99864
FBgn0013697	0.402356	0.99864
FBgn0013698	-0.0959494	0.99864
FBgn0013699	-0.00348836	0.99864
FBgn0013700	0.0357471	0.99864
FBgn0013701	0.275117	0.99864
FBgn0013702	-0.316119	0.99864
FBgn0013703	0.0358786	0.99864
FBgn0013704	0.686273	0.99864
FBgn0013705	0.619821	0.99864
FBgn0013707	-0.176383	0.99864
FBgn0013708	0.122272	0.99864
FBgn0013709	-0.115371	0.99864
FBgn0013710	0.220591	0.99864
FBgn0013717	0.360849	0.99864
FBgn0013718	0.0892685	0.99864
FBgn0013720	-0.0727056	0.99864
FBgn0013725	0.693315	0.99864
FBgn0013726	0.376836	0.99864
FBgn0013733	0.0956736	0.99864
FBgn0013746	0.0475263	0.99864
FBgn0013749	0.130353	0.99864
FBgn0013750	0.297764	0.99864
FBgn0013751	-0.0265937	0.99864
FBgn0013753	0.211605	0.99864
FBgn0013755	0.064144	0.99864
FBgn0013756	0.49849	0.99864
FBgn0013759	-0.239996	0.99864
FBgn0013762	0.054314	0.99864
FBgn0013763	0.11175	0.99864
FBgn0013764	0.126609	0.99864
FBgn0013765	0.0767187	0.99864
FBgn0013767	0.0390552	0.99864
FBgn0013770	0.268605	0.99864
FBgn0013771	-0.343198	0.99864
FBgn0013772	-0.123056	0.99864
FBgn0013773	0.274237	0.99864
FBgn0013799	0.198458	0.99864
FBgn0013810	-0.0394293	0.99864
FBgn0013811	0.0351321	0.99864
FBgn0013812	0.018669	0.99864
FBgn0013813	-0.078596	0.99864
FBgn0013949	-0.151609	0.99864
FBgn0013953	0.243344	0.99864
FBgn0013954	-0.0325238	0.99864
FBgn0013972	-0.18829	0.99864
FBgn0013973	-0.0515587	0.99864
FBgn0013981	0.184355	0.99864
FBgn0013983	0.0770297	0.99864
FBgn0013987	-0.017969	0.99864
FBgn0013995	0.00565284	0.99864
FBgn0013997	0.372054	0.99864
FBgn0014000	-0.100047	0.99864
FBgn0014002	0.00625713	0.99864
FBgn0014006	0.0455386	0.99864
FBgn0014007	0.288916	0.99864
FBgn0014009	0.144994	0.99864
FBgn0014010	0.0595282	0.99864
FBgn0014011	-0.161222	0.99864
FBgn0014018	-0.339528	0.99864
FBgn0014019	-0.0231197	0.99864
FBgn0014020	0.117399	0.99864
FBgn0014022	0.445138	0.99864
FBgn0014023	-0.168216	0.99864
FBgn0014024	0.022966	0.99864
FBgn0014026	-0.0287853	0.99864
FBgn0014028	0.0654939	0.99864
FBgn0014029	0.0199358	0.99864
FBgn0014031	-0.193925	0.99864
FBgn0014032	-0.120298	0.99864
FBgn0014033	-0.144431	0.99864
FBgn0014037	0.277391	0.99864
FBgn0014073	0.111235	0.99864
FBgn0014075	0.151104	0.99864
FBgn0014076	-0.0388298	0.99864
FBgn0014092	0.020562	0.99864
FBgn0014127	0.0416721	0.99864
FBgn0014133	0.250704	0.99864
FBgn0014135	-0.0700545	0.99864
FBgn0014141	-0.155335	0.99864
FBgn0014143	0.206511	0.99864
FBgn0014163	0.499227	0.99864
FBgn0014179	0.043856	0.99864
FBgn0014184	-0.0390539	0.99864
FBgn0014189	0.0737147	0.99864
FBgn0014269	-0.0377856	0.99864
FBgn0014340	0.256361	0.99864
FBgn0014342	-0.224632	0.99864
FBgn0014343	0.407804	0.99864
FBgn0014366	0.302594	0.99864
FBgn0014368	0.0137723	0.99864
FBgn0014380	-0.130637	0.99864
FBgn0014388	-0.0962005	0.99864
FBgn0014391	0.207115	0.99864
FBgn0014395	0.023875	0.99864
FBgn0014396	-0.328375	0.99864
FBgn0014411	0.209188	0.99864
FBgn0014417	0.158876	0.99864
FBgn0014427	0.0910128	0.99864
FBgn0014455	-0.369441	0.99864
FBgn0014465	-0.101738	0.99864
FBgn0014466	0.0156753	0.99864
FBgn0014469	0.707353	0.99864
FBgn0014859	-0.144349	0.99864
FBgn0014861	0.0623776	0.99864
FBgn0014863	-0.139939	0.99864
FBgn0014865	-0.360308	0.99864
FBgn0014868	-0.267514	0.99864
FBgn0014869	-0.0521239	0.99864
FBgn0014870	0.424144	0.99864
FBgn0014877	-0.230487	0.99864
FBgn0014879	0.368135	0.99864
FBgn0014903	-0.0874392	0.99864
FBgn0014906	0.0118215	0.99864
FBgn0014930	-0.125078	0.99864
FBgn0014931	-0.0104873	0.99864
FBgn0014949	-0.0293989	0.99864
FBgn0015000	-0.354768	0.99864
FBgn0015001	-0.461907	0.99864
FBgn0015008	0.0156753	0.99864
FBgn0015010	-0.222683	0.99864
FBgn0015011	-0.164124	0.99864
FBgn0015019	-0.128071	0.99864
FBgn0015024	0.471026	0.99864
FBgn0015025	0.126731	0.99864
FBgn0015031	-0.0243798	0.99864
FBgn0015032	-0.0031764	0.99864
FBgn0015033	-0.108539	0.99864
FBgn0015034	-0.143647	0.99864
FBgn0015035	-0.21632	0.99864
FBgn0015036	-0.275735	0.99864
FBgn0015037	-0.275986	0.99864
FBgn0015038	-0.167227	0.99864
FBgn0015039	-0.353114	0.99864
FBgn0015040	0.0654376	0.99864
FBgn0015075	-0.0408071	0.99864
FBgn0015218	-0.00434578	0.99864
FBgn0015221	-0.178574	0.99864
FBgn0015222	0.149747	0.99864
FBgn0015229	0.019631	0.99864
FBgn0015239	0.677672	0.99864
FBgn0015240	-0.243377	0.99864
FBgn0015245	-0.351462	0.99864
FBgn0015247	-0.00469609	0.99864
FBgn0015268	-0.16215	0.99864
FBgn0015269	0.117191	0.99864
FBgn0015270	0.137363	0.99864
FBgn0015271	0.16643	0.99864
FBgn0015277	-0.124992	0.99864
FBgn0015278	0.0471474	0.99864
FBgn0015279	0.189976	0.99864
FBgn0015282	0.00950468	0.99864
FBgn0015283	-0.26497	0.99864
FBgn0015286	0.161332	0.99864
FBgn0015288	0.406951	0.99864
FBgn0015295	-0.229412	0.99864
FBgn0015296	-0.260527	0.99864
FBgn0015298	0.107237	0.99864
FBgn0015299	-0.181527	0.99864
FBgn0015300	-0.0443555	0.99864
FBgn0015316	-0.096796	0.99864
FBgn0015320	0.646428	0.99864
FBgn0015321	0.333822	0.99864
FBgn0015331	0.179453	0.99864
FBgn0015336	-0.516828	0.99864
FBgn0015338	-0.190639	0.99864
FBgn0015351	-0.238886	0.99864
FBgn0015359	-0.0114099	0.99864
FBgn0015360	-0.0408072	0.99864
FBgn0015371	0.296697	0.99864
FBgn0015372	-0.0828524	0.99864
FBgn0015376	-0.444309	0.99864
FBgn0015379	0.0232274	0.99864
FBgn0015380	0.155942	0.99864
FBgn0015381	-0.0200686	0.99864
FBgn0015391	0.469145	0.99864
FBgn0015393	-0.284803	0.99864
FBgn0015396	0.214204	0.99864
FBgn0015399	0.545792	0.99864
FBgn0015400	0.0532429	0.99864
FBgn0015402	0.167961	0.99864
FBgn0015477	0.154204	0.99864
FBgn0015509	0.142356	0.99864
FBgn0015513	-0.00954572	0.99864
FBgn0015519	0.0179185	0.99864
FBgn0015520	0.519348	0.99864
FBgn0015521	0.11992	0.99864
FBgn0015522	-0.106169	0.99864
FBgn0015524	0.0396883	0.99864
FBgn0015527	0.201078	0.99864
FBgn0015541	-0.178313	0.99864
FBgn0015543	0.00429414	0.99864
FBgn0015544	-0.144177	0.99864
FBgn0015546	0.120283	0.99864
FBgn0015550	0.0705887	0.99864
FBgn0015553	-0.0305638	0.99864
FBgn0015558	-0.178287	0.99864
FBgn0015561	0.0134243	0.99864
FBgn0015568	-0.123246	0.99864
FBgn0015569	-0.291947	0.99864
FBgn0015570	0.0185458	0.99864
FBgn0015571	-0.271352	0.99864
FBgn0015572	0.00987894	0.99864
FBgn0015574	0.101149	0.99864
FBgn0015575	-0.331997	0.99864
FBgn0015576	-0.0254381	0.99864
FBgn0015577	-0.101976	0.99864
FBgn0015582	-0.257727	0.99864
FBgn0015584	-0.199799	0.99864
FBgn0015585	-0.138523	0.99864
FBgn0015589	-0.0392294	0.99864
FBgn0015591	0.0769256	0.99864
FBgn0015600	0.0760341	0.99864
FBgn0015602	0.0614791	0.99864
FBgn0015609	0.16114	0.99864
FBgn0015614	0.103096	0.99864
FBgn0015615	-0.152619	0.99864
FBgn0015618	0.107332	0.99864
FBgn0015622	-0.0779139	0.99864
FBgn0015623	0.12629	0.99864
FBgn0015625	0.131228	0.99864
FBgn0015663	-0.144413	0.99864
FBgn0015664	0.324927	0.99864
FBgn0015714	-0.157067	0.99864
FBgn0015721	0.177181	0.99864
FBgn0015737	0.115391	0.99864
FBgn0015754	0.105951	0.99864
FBgn0015756	-0.0262945	0.99864
FBgn0015765	0.0958553	0.99864
FBgn0015766	-0.135351	0.99864
FBgn0015770	0.0156753	0.99864
FBgn0015772	0.370723	0.99864
FBgn0015773	0.17916	0.99864
FBgn0015774	0.0349697	0.99864
FBgn0015776	0.0705384	0.99864
FBgn0015777	0.197813	0.99864
FBgn0015778	0.299271	0.99864
FBgn0015781	0.0959856	0.99864
FBgn0015789	0.019362	0.99864
FBgn0015790	0.163935	0.99864
FBgn0015791	0.00752271	0.99864
FBgn0015793	-0.150662	0.99864
FBgn0015794	-0.118229	0.99864
FBgn0015795	-0.20738	0.99864
FBgn0015797	-0.158637	0.99864
FBgn0015799	0.00419886	0.99864
FBgn0015801	-0.11148	0.99864
FBgn0015803	0.407532	0.99864
FBgn0015805	0.0777622	0.99864
FBgn0015808	0.0386181	0.99864
FBgn0015818	0.205778	0.99864
FBgn0015828	0.0522238	0.99864
FBgn0015829	0.0647544	0.99864
FBgn0015831	0.0841478	0.99864
FBgn0015834	0.0107771	0.99864
FBgn0015838	-0.0293252	0.99864
FBgn0015872	-0.193564	0.99864
FBgn0015903	0.388705	0.99864
FBgn0015904	-0.137423	0.99864
FBgn0015905	0.0608054	0.99864
FBgn0015919	-0.0294954	0.99864
FBgn0015924	0.0462136	0.99864
FBgn0015925	0.0442877	0.99864
FBgn0015926	0.201796	0.99864
FBgn0015929	-0.0566349	0.99864
FBgn0015949	0.27264	0.99864
FBgn0016013	-0.0220031	0.99864
FBgn0016031	-0.302461	0.99864
FBgn0016032	-0.196079	0.99864
FBgn0016034	0.0151945	0.99864
FBgn0016036	-0.0288344	0.99864
FBgn0016038	-0.181019	0.99864
FBgn0016041	0.156993	0.99864
FBgn0016047	-0.0031764	0.99864
FBgn0016053	0.0223667	0.99864
FBgn0016054	0.533881	0.99864
FBgn0016059	0.197606	0.99864
FBgn0016061	0.0421763	0.99864
FBgn0016070	0.369451	0.99864
FBgn0016075	-0.0402457	0.99864
FBgn0016076	-0.210893	0.99864
FBgn0016078	-0.0477592	0.99864
FBgn0016080	0.102357	0.99864
FBgn0016081	-0.163212	0.99864
FBgn0016119	-0.0606775	0.99864
FBgn0016120	0.0240992	0.99864
FBgn0016122	0.146081	0.99864
FBgn0016123	-0.162667	0.99864
FBgn0016126	0.351068	0.99864
FBgn0016131	0.0714033	0.99864
FBgn0016641	-0.258324	0.99864
FBgn0016650	-0.407665	0.99864
FBgn0016660	0.0361009	0.99864
FBgn0016672	-0.508552	0.99864
FBgn0016675	0.0124901	0.99864
FBgn0016684	-0.120549	0.99864
FBgn0016685	0.175281	0.99864
FBgn0016687	-0.100021	0.99864
FBgn0016691	0.154401	0.99864
FBgn0016693	-0.0512731	0.99864
FBgn0016694	-0.244691	0.99864
FBgn0016696	-0.0606437	0.99864
FBgn0016697	0.0547125	0.99864
FBgn0016698	0.115785	0.99864
FBgn0016700	0.00465733	0.99864
FBgn0016701	0.0737982	0.99864
FBgn0016715	-0.151114	0.99864
FBgn0016726	-0.0935198	0.99864
FBgn0016754	0.212236	0.99864
FBgn0016756	0.136035	0.99864
FBgn0016762	-0.0366313	0.99864
FBgn0016794	-0.183139	0.99864
FBgn0016797	0.0987694	0.99864
FBgn0016917	0.064546	0.99864
FBgn0016919	-0.0316911	0.99864
FBgn0016920	0.0385414	0.99864
FBgn0016926	0.312406	0.99864
FBgn0016930	0.450054	0.99864
FBgn0016970	-0.0787354	0.99864
FBgn0016974	0.0132555	0.99864
FBgn0016977	0.395216	0.99864
FBgn0016978	0.1494	0.99864
FBgn0016983	0.22779	0.99864
FBgn0016984	-0.218582	0.99864
FBgn0017414	0.0397808	0.99864
FBgn0017418	0.270599	0.99864
FBgn0017429	-0.278004	0.99864
FBgn0017430	0.217693	0.99864
FBgn0017448	-0.0399593	0.99864
FBgn0017456	-0.0529915	0.99864
FBgn0017457	0.392016	0.99864
FBgn0017482	-0.238006	0.99864
FBgn0017545	0.114879	0.99864
FBgn0017550	0.132298	0.99864
FBgn0017551	0.0308175	0.99864
FBgn0017556	0.0756338	0.99864
FBgn0017558	0.0935638	0.99864
FBgn0017561	0.237668	0.99864
FBgn0017566	-0.0993262	0.99864
FBgn0017567	0.0759029	0.99864
FBgn0017572	0.223767	0.99864
FBgn0017577	0.131298	0.99864
FBgn0017578	0.42158	0.99864
FBgn0017579	0.00744846	0.99864
FBgn0017581	0.120081	0.99864
FBgn0017590	-0.0601606	0.99864
FBgn0019624	-0.0909877	0.99864
FBgn0019637	0.071082	0.99864
FBgn0019643	-0.316421	0.99864
FBgn0019644	-0.120946	0.99864
FBgn0019650	0.184985	0.99864
FBgn0019660	0.0131799	0.99864
FBgn0019661	0.261821	0.99864
FBgn0019662	0.0288542	0.99864
FBgn0019686	0.0116964	0.99864
FBgn0019828	-0.191743	0.99864
FBgn0019830	0.00484907	0.99864
FBgn0019890	0.20974	0.99864
FBgn0019925	0.0210856	0.99864
FBgn0019928	-0.396925	0.99864
FBgn0019929	-0.0206016	0.99864
FBgn0019932	0.167468	0.99864
FBgn0019938	-0.330788	0.99864
FBgn0019940	0.104663	0.99864
FBgn0019947	0.0255788	0.99864
FBgn0019949	0.180306	0.99864
FBgn0019952	0.00420848	0.99864
FBgn0019957	-0.0353775	0.99864
FBgn0019960	-0.0403344	0.99864
FBgn0019968	0.168802	0.99864
FBgn0019972	0.195437	0.99864
FBgn0019982	-0.152797	0.99864
FBgn0019985	-0.103539	0.99864
FBgn0019990	0.0540181	0.99864
FBgn0020018	-0.353258	0.99864
FBgn0020224	0.319747	0.99864
FBgn0020235	-0.224488	0.99864
FBgn0020236	-0.152269	0.99864
FBgn0020238	0.35768	0.99864
FBgn0020248	0.0127851	0.99864
FBgn0020249	0.0654017	0.99864
FBgn0020251	0.141903	0.99864
FBgn0020255	0.236402	0.99864
FBgn0020257	0.215103	0.99864
FBgn0020258	0.0156753	0.99864
FBgn0020261	-0.00570721	0.99864
FBgn0020269	-0.21413	0.99864
FBgn0020270	0.115762	0.99864
FBgn0020272	0.0798689	0.99864
FBgn0020277	-0.00329896	0.99864
FBgn0020278	0.0135168	0.99864
FBgn0020279	0.486832	0.99864
FBgn0020294	0.0432628	0.99864
FBgn0020299	-0.0312582	0.99864
FBgn0020300	0.478048	0.99864
FBgn0020304	0.105539	0.99864
FBgn0020305	0.18251	0.99864
FBgn0020306	0.516413	0.99864
FBgn0020307	0.168751	0.99864
FBgn0020309	-0.146826	0.99864
FBgn0020312	0.00748191	0.99864
FBgn0020369	-0.129108	0.99864
FBgn0020370	0.145415	0.99864
FBgn0020371	-0.100056	0.99864
FBgn0020372	-0.086525	0.99864
FBgn0020376	-0.0200686	0.99864
FBgn0020377	0.65208	0.99864
FBgn0020378	0.00496848	0.99864
FBgn0020379	-0.391648	0.99864
FBgn0020381	-0.0883751	0.99864
FBgn0020385	-0.238603	0.99864
FBgn0020386	0.191302	0.99864
FBgn0020388	0.0730368	0.99864
FBgn0020389	-0.210445	0.99864
FBgn0020391	-0.0599825	0.99864
FBgn0020392	0.229536	0.99864
FBgn0020399	0.0196234	0.99864
FBgn0020407	-0.0255278	0.99864
FBgn0020412	0.206296	0.99864
FBgn0020414	-0.27632	0.99864
FBgn0020415	0.806213	0.99864
FBgn0020416	-0.254797	0.99864
FBgn0020429	0.0156753	0.99864
FBgn0020440	0.235328	0.99864
FBgn0020443	0.155689	0.99864
FBgn0020445	0.00652375	0.99864
FBgn0020493	-0.135652	0.99864
FBgn0020496	0.564799	0.99864
FBgn0020497	0.472248	0.99864
FBgn0020503	0.285808	0.99864
FBgn0020506	-0.0225302	0.99864
FBgn0020508	-0.317015	0.99864
FBgn0020509	-0.126733	0.99864
FBgn0020510	0.303327	0.99864
FBgn0020513	-0.0693567	0.99864
FBgn0020518	-0.0014406	0.99864
FBgn0020521	-0.0161594	0.99864
FBgn0020545	-0.157692	0.99864
FBgn0020546	0.106451	0.99864
FBgn0020556	0.369567	0.99864
FBgn0020616	-0.12538	0.99864
FBgn0020617	-0.0031764	0.99864
FBgn0020618	0.255431	0.99864
FBgn0020620	0.182502	0.99864
FBgn0020621	0.10236	0.99864
FBgn0020622	0.0534716	0.99864
FBgn0020626	0.167345	0.99864
FBgn0020633	0.236979	0.99864
FBgn0020637	0.27188	0.99864
FBgn0020638	0.291587	0.99864
FBgn0020639	0.0156753	0.99864
FBgn0020641	0.0156753	0.99864
FBgn0020642	0.0315888	0.99864
FBgn0020647	0.00479341	0.99864
FBgn0020653	-0.210746	0.99864
FBgn0020655	-0.0259253	0.99864
FBgn0020660	0.51938	0.99864
FBgn0020762	-0.286312	0.99864
FBgn0020764	-0.393873	0.99864
FBgn0020765	-0.00605672	0.99864
FBgn0020767	-0.045803	0.99864
FBgn0020880	-0.128641	0.99864
FBgn0020887	0.121222	0.99864
FBgn0020906	-0.303445	0.99864
FBgn0020907	-0.153317	0.99864
FBgn0020908	-0.427143	0.99864
FBgn0020909	0.110842	0.99864
FBgn0020910	0.125544	0.99864
FBgn0020912	-0.170446	0.99864
FBgn0020930	0.0278958	0.99864
FBgn0021738	0.0455722	0.99864
FBgn0021750	-0.198773	0.99864
FBgn0021760	0.515806	0.99864
FBgn0021761	0.0252885	0.99864
FBgn0021764	0.524821	0.99864
FBgn0021765	-0.0482084	0.99864
FBgn0021767	0.132869	0.99864
FBgn0021768	-0.204875	0.99864
FBgn0021776	0.732071	0.99864
FBgn0021795	-0.134951	0.99864
FBgn0021796	-0.0799608	0.99864
FBgn0021800	0.4046	0.99864
FBgn0021814	-0.0702427	0.99864
FBgn0021818	0.132893	0.99864
FBgn0021825	0.019207	0.99864
FBgn0021847	0.0268199	0.99864
FBgn0021856	-0.185533	0.99864
FBgn0021872	-0.0790604	0.99864
FBgn0021874	0.0224198	0.99864
FBgn0021875	-0.178849	0.99864
FBgn0021895	0.286601	0.99864
FBgn0021906	0.071823	0.99864
FBgn0021944	0.0635397	0.99864
FBgn0021967	0.045222	0.99864
FBgn0021979	0.190404	0.99864
FBgn0021995	0.358168	0.99864
FBgn0022023	-0.0461635	0.99864
FBgn0022027	-0.337428	0.99864
FBgn0022029	-0.00854801	0.99864
FBgn0022069	0.53703	0.99864
FBgn0022097	-0.422875	0.99864
FBgn0022153	-0.216084	0.99864
FBgn0022160	-0.00976818	0.99864
FBgn0022213	-0.104425	0.99864
FBgn0022224	0.172062	0.99864
FBgn0022238	0.4966	0.99864
FBgn0022288	0.222683	0.99864
FBgn0022338	0.052571	0.99864
FBgn0022343	-0.204336	0.99864
FBgn0022344	-0.485093	0.99864
FBgn0022349	0.253102	0.99864
FBgn0022355	-0.285722	0.99864
FBgn0022359	-0.540557	0.99864
FBgn0022361	0.27337	0.99864
FBgn0022382	-0.218864	0.99864
FBgn0022699	0.149929	0.99864
FBgn0022700	-0.222128	0.99864
FBgn0022702	-0.330472	0.99864
FBgn0022709	-0.260481	0.99864
FBgn0022710	0.14153	0.99864
FBgn0022724	0.154147	0.99864
FBgn0022740	0.0711134	0.99864
FBgn0022764	0.499671	0.99864
FBgn0022768	0.338348	0.99864
FBgn0022772	0.182362	0.99864
FBgn0022774	-0.191318	0.99864
FBgn0022786	-0.368672	0.99864
FBgn0022787	0.147341	0.99864
FBgn0022800	-0.0295677	0.99864
FBgn0022893	0.558847	0.99864
FBgn0022935	-0.230703	0.99864
FBgn0022936	0.00601514	0.99864
FBgn0022942	0.140534	0.99864
FBgn0022943	0.0603111	0.99864
FBgn0022959	0.141224	0.99864
FBgn0022960	0.4055	0.99864
FBgn0022981	0.18471	0.99864
FBgn0022984	0.19468	0.99864
FBgn0022985	0.207443	0.99864
FBgn0022986	0.144277	0.99864
FBgn0022987	0.178533	0.99864
FBgn0023000	0.230562	0.99864
FBgn0023001	0.176307	0.99864
FBgn0023023	0.00481456	0.99864
FBgn0023076	-0.195083	0.99864
FBgn0023081	0.0365412	0.99864
FBgn0023083	0.090631	0.99864
FBgn0023090	-0.0236878	0.99864
FBgn0023094	-0.19268	0.99864
FBgn0023095	-0.285648	0.99864
FBgn0023097	0.210035	0.99864
FBgn0023129	0.195891	0.99864
FBgn0023130	0.133506	0.99864
FBgn0023143	-0.0882997	0.99864
FBgn0023167	0.221686	0.99864
FBgn0023169	-0.21394	0.99864
FBgn0023170	0.392248	0.99864
FBgn0023171	-0.055054	0.99864
FBgn0023172	0.106947	0.99864
FBgn0023174	0.0786038	0.99864
FBgn0023175	0.211922	0.99864
FBgn0023177	0.0485691	0.99864
FBgn0023178	-0.055296	0.99864
FBgn0023179	-0.267808	0.99864
FBgn0023180	0.0573333	0.99864
FBgn0023181	-0.0265758	0.99864
FBgn0023197	-0.224963	0.99864
FBgn0023212	0.41546	0.99864
FBgn0023213	0.23623	0.99864
FBgn0023214	-0.0406135	0.99864
FBgn0023215	0.335771	0.99864
FBgn0023216	0.245551	0.99864
FBgn0023388	0.067183	0.99864
FBgn0023395	0.0208932	0.99864
FBgn0023407	0.35341	0.99864
FBgn0023415	-0.0139294	0.99864
FBgn0023416	0.0556404	0.99864
FBgn0023441	0.271297	0.99864
FBgn0023458	-0.0799646	0.99864
FBgn0023477	-0.124936	0.99864
FBgn0023479	-0.314433	0.99864
FBgn0023489	-0.0834121	0.99864
FBgn0023495	0.0156753	0.99864
FBgn0023496	-0.115658	0.99864
FBgn0023506	0.0455525	0.99864
FBgn0023507	-0.273661	0.99864
FBgn0023508	-0.615393	0.99864
FBgn0023509	0.133215	0.99864
FBgn0023510	0.213551	0.99864
FBgn0023511	0.0818597	0.99864
FBgn0023512	0.199155	0.99864
FBgn0023513	0.086008	0.99864
FBgn0023514	0.144263	0.99864
FBgn0023515	-0.234837	0.99864
FBgn0023516	-0.448005	0.99864
FBgn0023517	0.162694	0.99864
FBgn0023518	0.19209	0.99864
FBgn0023519	-0.0225327	0.99864
FBgn0023520	-0.182914	0.99864
FBgn0023521	0.0920822	0.99864
FBgn0023522	0.170473	0.99864
FBgn0023523	0.0554592	0.99864
FBgn0023524	-0.00862321	0.99864
FBgn0023525	0.0562422	0.99864
FBgn0023526	0.0411629	0.99864
FBgn0023527	0.22413	0.99864
FBgn0023528	0.401794	0.99864
FBgn0023529	0.0810716	0.99864
FBgn0023530	-0.0975551	0.99864
FBgn0023531	0.161458	0.99864
FBgn0023534	-0.0793135	0.99864
FBgn0023535	-0.0559489	0.99864
FBgn0023536	-0.0232953	0.99864
FBgn0023537	-0.409187	0.99864
FBgn0023540	-0.139863	0.99864
FBgn0023541	-0.301704	0.99864
FBgn0023542	-0.281955	0.99864
FBgn0023545	0.0414887	0.99864
FBgn0023549	-0.0836103	0.99864
FBgn0024150	0.470148	0.99864
FBgn0024177	-0.226191	0.99864
FBgn0024179	-0.298115	0.99864
FBgn0024183	0.0108038	0.99864
FBgn0024184	-0.0259983	0.99864
FBgn0024187	-0.122374	0.99864
FBgn0024188	0.231906	0.99864
FBgn0024191	0.203508	0.99864
FBgn0024194	0.0275643	0.99864
FBgn0024196	0.204379	0.99864
FBgn0024222	-0.147099	0.99864
FBgn0024227	0.24135	0.99864
FBgn0024230	-0.0160995	0.99864
FBgn0024232	0.0317878	0.99864
FBgn0024234	0.309916	0.99864
FBgn0024236	0.167857	0.99864
FBgn0024238	-0.121123	0.99864
FBgn0024244	0.191949	0.99864
FBgn0024245	0.437816	0.99864
FBgn0024248	0.11894	0.99864
FBgn0024249	-0.0200686	0.99864
FBgn0024250	0.568091	0.99864
FBgn0024251	0.0258282	0.99864
FBgn0024273	-0.205176	0.99864
FBgn0024277	0.23577	0.99864
FBgn0024285	0.273409	0.99864
FBgn0024288	0.0452747	0.99864
FBgn0024289	-0.174735	0.99864
FBgn0024291	0.269114	0.99864
FBgn0024293	-0.482493	0.99864
FBgn0024294	-0.0859526	0.99864
FBgn0024314	-0.0943606	0.99864
FBgn0024315	-0.361314	0.99864
FBgn0024319	0.0805326	0.99864
FBgn0024320	-0.0716694	0.99864
FBgn0024321	-0.0402993	0.99864
FBgn0024326	0.0576983	0.99864
FBgn0024329	0.104398	0.99864
FBgn0024330	0.291002	0.99864
FBgn0024332	-0.0970491	0.99864
FBgn0024352	-0.0994285	0.99864
FBgn0024360	-0.203934	0.99864
FBgn0024361	-0.397781	0.99864
FBgn0024362	0.109871	0.99864
FBgn0024364	-0.0497508	0.99864
FBgn0024365	0.0874392	0.99864
FBgn0024366	-0.0708636	0.99864
FBgn0024371	-0.0689177	0.99864
FBgn0024432	0.142818	0.99864
FBgn0024491	0.116369	0.99864
FBgn0024509	0.0521177	0.99864
FBgn0024510	0.165741	0.99864
FBgn0024542	0.101977	0.99864
FBgn0024555	0.398161	0.99864
FBgn0024556	-0.17902	0.99864
FBgn0024558	-0.0967006	0.99864
FBgn0024689	-0.00661224	0.99864
FBgn0024698	0.014734	0.99864
FBgn0024728	0.339955	0.99864
[truncated: 15,423 more rows]

## Sheet: D. dl WT_Df vs dl SCR_Df
Gene	log2FoldChange	adjusted p-value
FBgn0083973	2.64056	2.8e-22
FBgn0085243	2.32901	1.39e-16
FBgn0000227	2.25022	1.28e-15
FBgn0038566	2.25903	3.64e-15
FBgn0035569	2.18128	5.49e-14
FBgn0004389	2.156	5.82e-14
FBgn0042199	1.9555	4.46e-11
FBgn0003683	1.95207	4.51e-11
FBgn0031621	1.86819	4.78e-10
FBgn0031718	1.82867	1.18e-09
FBgn0013755	1.82741	1.38e-09
FBgn0004143	1.80489	2.32e-09
FBgn0004053	1.63519	1.13e-07
FBgn0035572	1.54125	7.73e-07
FBgn0029931	1.53249	1.5e-06
FBgn0037797	1.50478	3.14e-06
FBgn0030807	1.48126	5.2e-06
FBgn0043854	1.3336	2.11e-05
FBgn0013686	1.29582	5.63e-05
FBgn0001320	1.34461	7.23e-05
FBgn0263971	1.27941	7.6e-05
FBgn0003900	1.32863	9.06e-05
FBgn0004635	1.32074	0.000121764
FBgn0005590	1.19367	0.000694234
FBgn0036810	1.11349	0.00248642
FBgn0024150	1.10551	0.00301134
FBgn0032489	1.12697	0.00308438
FBgn0001150	1.1141	0.00342283
FBgn0263707	1.08058	0.00348777
FBgn0031719	1.03308	0.00360821
FBgn0003448	1.07899	0.00403988
FBgn0000228	1.05879	0.00425338
FBgn0001077	1.05625	0.00478193
FBgn0037992	1.02032	0.00631417
FBgn0043791	1.03005	0.00631417
FBgn0004102	1.03616	0.00649722
FBgn0003720	0.985738	0.0101453
FBgn0038385	0.983595	0.0101453
FBgn0003002	0.982506	0.0107528
FBgn0036791	1.00167	0.0107528
FBgn0085295	1.00039	0.0107528
FBgn0020300	0.997068	0.0125682
FBgn0086027	-0.948819	0.0129789
FBgn0003731	0.995577	0.0143405
FBgn0036503	1.02576	0.0143405
FBgn0001149	-0.823495	0.0148735
FBgn0003270	0.977886	0.0155293
FBgn0026361	0.971582	0.0156616
FBgn0003300	0.916594	0.0170542
FBgn0003719	0.923113	0.0201343
FBgn0004956	0.913878	0.0201343
FBgn0263380	0.960261	0.0205954
FBgn0029114	0.971296	0.0229697
FBgn0263256	0.978713	0.0240747
FBgn0052364	0.970345	0.0276905
FBgn0032377	0.938482	0.0313515
FBgn0266756	0.958549	0.0318788
FBgn0001174	0.839172	0.0321225
FBgn0259745	0.922917	0.0331868
FBgn0000606	0.830607	0.0527342
FBgn0261434	0.851145	0.0583112
FBgn0026160	0.899234	0.0586698
FBgn0037504	0.909548	0.0607543
FBgn0004054	0.745487	0.0661978
FBgn0033652	0.8583	0.066582
FBgn0010109	0.836025	0.068824
FBgn0262531	0.873321	0.0691373
FBgn0035570	0.770008	0.0811207
FBgn0044028	0.783945	0.0813099
FBgn0015949	0.826408	0.0875481
FBgn0000180	0.850626	0.0898158
FBgn0266418	0.852672	0.0956191
FBgn0003567	0.832999	0.0993695
FBgn0013679	0.729527	0.105721
FBgn0000449	0.755608	0.115024
FBgn0004170	0.779161	0.115024
FBgn0010238	0.824899	0.119219
FBgn0264817	0.705217	0.119219
FBgn0262952	0.651141	0.121429
FBgn0036349	0.723914	0.125365
FBgn0013684	0.700699	0.140928
FBgn0004052	0.670274	0.144337
FBgn0013681	0.78592	0.144337
FBgn0044049	0.802332	0.144337
FBgn0260400	0.812221	0.153053
FBgn0030529	0.745119	0.156649
FBgn0265697	0.697725	0.175906
FBgn0027932	0.736678	0.184288
FBgn0032491	0.696934	0.218135
FBgn0087040	-0.679377	0.221283
FBgn0264270	0.75885	0.293199
FBgn0000490	0.715503	0.295929
FBgn0267791	0.703485	0.304074
FBgn0250754	0.751573	0.307353
FBgn0000547	0.735689	0.311137
FBgn0262945	0.747389	0.343285
FBgn0002985	0.74677	0.346172
FBgn0013678	0.584542	0.350621
FBgn0013725	0.696719	0.356965
FBgn0000463	0.70728	0.414056
FBgn0011723	0.710815	0.414056
FBgn0013770	0.630782	0.414056
FBgn0033483	0.719728	0.414056
FBgn0038476	0.63787	0.414056
FBgn0259685	0.705845	0.414056
FBgn0051155	0.720177	0.417337
FBgn0003391	0.704558	0.417816
FBgn0032335	0.566773	0.425208
FBgn0000459	0.667571	0.438588
FBgn0005771	0.715531	0.445785
FBgn0031393	0.556288	0.464852
FBgn0035208	0.574779	0.465862
FBgn0013672	0.563707	0.468811
FBgn0002561	0.597728	0.485909
FBgn0037443	0.66351	0.485909
FBgn0020556	0.547288	0.49305
FBgn0010348	0.629542	0.505402
FBgn0010416	0.691346	0.506387
FBgn0261503	0.607613	0.5317
FBgn0013673	0.672761	0.540961
FBgn0013685	0.636887	0.540961
FBgn0013690	0.652123	0.540961
FBgn0028978	0.667524	0.540961
FBgn0034479	0.656183	0.540961
FBgn0259173	0.683932	0.56135
FBgn0037213	0.655471	0.565339
FBgn0041094	0.604355	0.565339
FBgn0039283	0.565877	0.573048
FBgn0004364	0.581929	0.685703
FBgn0053977	-0.588541	0.685703
FBgn0004646	0.652564	0.700192
FBgn0034606	0.595291	0.700192
FBgn0003396	0.644916	0.702224
FBgn0035397	0.592181	0.711869
FBgn0000542	0.550478	0.720827
FBgn0001085	0.617419	0.720827
FBgn0041717	-0.635435	0.720827
FBgn0260642	0.601472	0.720827
FBgn0000576	0.550488	0.736404
FBgn0260799	0.632761	0.736404
FBgn0261873	0.646507	0.751543
FBgn0035954	0.525584	0.76353
FBgn0005631	0.53137	0.768413
FBgn0013680	0.606823	0.771131
FBgn0044510	0.614907	0.771131
FBgn0267576	0.462664	0.771131
FBgn0085432	0.632678	0.808386
FBgn0053503	-0.447293	0.865216
FBgn0266101	0.582756	0.865216
FBgn0004629	0.607714	0.874588
FBgn0032682	0.537432	0.876933
FBgn0013676	0.494088	0.882625
FBgn0036058	0.599304	0.883957
FBgn0264089	0.617406	0.883957
FBgn0026433	-0.582582	0.884818
FBgn0029907	0.579191	0.884818
FBgn0003997	0.608053	0.893351
FBgn0024804	0.619294	0.893351
FBgn0028371	0.574762	0.893351
FBgn0039167	0.55331	0.893351
FBgn0000575	0.582113	0.898604
FBgn0002932	0.579146	0.898604
FBgn0004183	-0.610804	0.898604
FBgn0004859	0.555487	0.898604
FBgn0028523	0.594717	0.898604
FBgn0039959	0.5859	0.898604
FBgn0266129	0.596626	0.898604
FBgn0001323	0.487733	0.906218
FBgn0039288	0.451445	0.906218
FBgn0040022	0.610325	0.906218
FBgn0000565	0.594081	0.920007
FBgn0051075	-0.609539	0.920007
FBgn0015393	-0.502364	0.932251
FBgn0033000	0.542482	0.932251
FBgn0003268	-0.568455	0.937419
FBgn0026319	0.601122	0.956234
FBgn0000273	0.550242	0.965621
FBgn0002873	0.579727	0.987207
FBgn0031893	0.567442	0.987207
FBgn0033209	-0.513164	0.987207
FBgn0034223	0.597572	0.987207
FBgn0037007	0.567564	0.987207
FBgn0262115	0.550777	0.987207
FBgn0262614	0.581452	0.994065
FBgn0000008	-0.286219	0.999997
FBgn0000014	0.182094	0.999997
FBgn0000015	0.132345	0.999997
FBgn0000017	0.377441	0.999997
FBgn0000018	-0.15196	0.999997
FBgn0000022	0.423416	0.999997
FBgn0000024	0.210536	0.999997
FBgn0000032	-0.1856	0.999997
FBgn0000036	0.070063	0.999997
FBgn0000038	-0.151804	0.999997
FBgn0000042	0.0851021	0.999997
FBgn0000043	0.0609565	0.999997
FBgn0000044	0.47367	0.999997
FBgn0000045	-0.00262123	0.999997
FBgn0000046	0.413108	0.999997
FBgn0000052	-0.265609	0.999997
FBgn0000053	-0.0738898	0.999997
FBgn0000057	-0.0849247	0.999997
FBgn0000063	-0.0460388	0.999997
FBgn0000064	0.0637847	0.999997
FBgn0000071	0.120806	0.999997
FBgn0000077	-0.0292669	0.999997
FBgn0000078	0.0246123	0.999997
FBgn0000079	-0.0073952	0.999997
FBgn0000083	0.234523	0.999997
FBgn0000084	-0.121484	0.999997
FBgn0000094	-0.082209	0.999997
FBgn0000097	0.277682	0.999997
FBgn0000100	0.494702	0.999997
FBgn0000108	0.157536	0.999997
FBgn0000109	0.0233901	0.999997
FBgn0000114	-0.0405853	0.999997
FBgn0000115	0.00487091	0.999997
FBgn0000116	0.218156	0.999997
FBgn0000117	0.0880349	0.999997
FBgn0000119	0.445653	0.999997
FBgn0000120	-0.130104	0.999997
FBgn0000121	-0.0602479	0.999997
FBgn0000139	0.0530813	0.999997
FBgn0000140	-0.120051	0.999997
FBgn0000146	-0.0645857	0.999997
FBgn0000147	0.067284	0.999997
FBgn0000150	-0.0735617	0.999997
FBgn0000152	-0.297927	0.999997
FBgn0000157	0.178946	0.999997
FBgn0000158	0.191487	0.999997
FBgn0000163	0.385475	0.999997
FBgn0000166	-0.162321	0.999997
FBgn0000173	0.192303	0.999997
FBgn0000181	-0.162943	0.999997
FBgn0000183	0.0958607	0.999997
FBgn0000212	0.12023	0.999997
FBgn0000216	0.219186	0.999997
FBgn0000221	-0.0872081	0.999997
FBgn0000229	0.147552	0.999997
FBgn0000233	0.457325	0.999997
FBgn0000239	0.103342	0.999997
FBgn0000244	-0.184345	0.999997
FBgn0000246	0.348441	0.999997
FBgn0000247	-0.138204	0.999997
FBgn0000250	0.059872	0.999997
FBgn0000251	-0.111502	0.999997
FBgn0000253	0.489797	0.999997
FBgn0000256	-0.118876	0.999997
FBgn0000257	-0.215773	0.999997
FBgn0000259	0.118799	0.999997
FBgn0000261	0.0321688	0.999997
FBgn0000276	0.0792632	0.999997
FBgn0000277	0.219526	0.999997
FBgn0000279	-0.0779666	0.999997
FBgn0000283	0.191136	0.999997
FBgn0000286	0.020561	0.999997
FBgn0000289	-0.134127	0.999997
FBgn0000299	0.0932746	0.999997
FBgn0000303	-0.157098	0.999997
FBgn0000307	0.185502	0.999997
FBgn0000308	0.470266	0.999997
FBgn0000316	0.145114	0.999997
FBgn0000317	0.215721	0.999997
FBgn0000318	0.0106153	0.999997
FBgn0000319	0.272273	0.999997
FBgn0000326	0.206293	0.999997
FBgn0000330	-0.231535	0.999997
FBgn0000339	0.0944836	0.999997
FBgn0000346	-0.0416442	0.999997
FBgn0000351	-0.421068	0.999997
FBgn0000352	-0.0105591	0.999997
FBgn0000370	0.260025	0.999997
FBgn0000376	-0.0518448	0.999997
FBgn0000377	0.0326526	0.999997
FBgn0000382	0.273337	0.999997
FBgn0000384	0.215558	0.999997
FBgn0000394	0.0109482	0.999997
FBgn0000395	0.313704	0.999997
FBgn0000404	-0.0161216	0.999997
FBgn0000405	0.122417	0.999997
FBgn0000406	0.0960753	0.999997
FBgn0000411	0.216142	0.999997
FBgn0000412	0.116827	0.999997
FBgn0000414	-0.00756206	0.999997
FBgn0000416	0.119223	0.999997
FBgn0000422	-0.108382	0.999997
FBgn0000426	-0.0783935	0.999997
FBgn0000442	0.0323201	0.999997
FBgn0000447	-0.143959	0.999997
FBgn0000451	-0.0283553	0.999997
FBgn0000454	-0.18421	0.999997
FBgn0000455	0.0348648	0.999997
FBgn0000464	-0.0774493	0.999997
FBgn0000473	-0.188232	0.999997
FBgn0000477	0.0602173	0.999997
FBgn0000479	0.198809	0.999997
FBgn0000482	-0.161301	0.999997
FBgn0000489	0.36759	0.999997
FBgn0000499	0.0253118	0.999997
FBgn0000520	-0.280874	0.999997
FBgn0000524	-0.0907108	0.999997
FBgn0000533	0.0222996	0.999997
FBgn0000536	0.00205813	0.999997
FBgn0000541	0.219936	0.999997
FBgn0000543	-0.0829017	0.999997
FBgn0000546	0.32956	0.999997
FBgn0000557	0.0345986	0.999997
FBgn0000559	0.0114432	0.999997
FBgn0000562	0.0333061	0.999997
FBgn0000566	-0.0892488	0.999997
FBgn0000567	-0.0485769	0.999997
FBgn0000568	0.112344	0.999997
FBgn0000577	0.165893	0.999997
FBgn0000578	0.525339	0.999997
FBgn0000579	-0.334734	0.999997
FBgn0000581	0.290637	0.999997
FBgn0000588	-0.282481	0.999997
FBgn0000591	0.284795	0.999997
FBgn0000592	0.130216	0.999997
FBgn0000611	0.196146	0.999997
FBgn0000615	-0.1923	0.999997
FBgn0000617	0.243234	0.999997
FBgn0000618	-0.00346708	0.999997
FBgn0000629	-0.333683	0.999997
FBgn0000633	0.373795	0.999997
FBgn0000635	0.0570497	0.999997
FBgn0000636	0.153073	0.999997
FBgn0000658	0.456737	0.999997
FBgn0000659	0.518446	0.999997
FBgn0000662	0.136722	0.999997
FBgn0000667	0.0754028	0.999997
FBgn0000709	0.0533743	0.999997
FBgn0000711	0.296053	0.999997
FBgn0000719	0.0769472	0.999997
FBgn0000721	0.278555	0.999997
FBgn0000723	0.188398	0.999997
FBgn0000808	0.0247178	0.999997
FBgn0000810	0.123703	0.999997
FBgn0000826	-0.53895	0.999997
FBgn0000927	-0.310188	0.999997
FBgn0000996	0.0628659	0.999997
FBgn0001075	0.348684	0.999997
FBgn0001078	0.271845	0.999997
FBgn0001079	0.00848528	0.999997
FBgn0001084	-0.027485	0.999997
FBgn0001086	0.0525241	0.999997
FBgn0001087	0.176691	0.999997
FBgn0001089	-0.164239	0.999997
FBgn0001090	0.229118	0.999997
FBgn0001091	-0.28224	0.999997
FBgn0001092	-0.112618	0.999997
FBgn0001098	0.0898243	0.999997
FBgn0001099	0.131167	0.999997
FBgn0001104	0.071067	0.999997
FBgn0001105	0.275087	0.999997
FBgn0001108	0.041494	0.999997
FBgn0001114	-0.0798982	0.999997
FBgn0001120	-0.357128	0.999997
FBgn0001122	0.10393	0.999997
FBgn0001123	0.427143	0.999997
FBgn0001124	0.111958	0.999997
FBgn0001125	-0.171849	0.999997
FBgn0001128	-0.0992469	0.999997
FBgn0001133	-0.0613459	0.999997
FBgn0001137	0.128018	0.999997
FBgn0001138	0.416662	0.999997
FBgn0001139	0.484931	0.999997
FBgn0001142	-0.0292548	0.999997
FBgn0001145	0.0414973	0.999997
FBgn0001148	0.275174	0.999997
FBgn0001168	0.180534	0.999997
FBgn0001169	0.426415	0.999997
FBgn0001179	-0.0939633	0.999997
FBgn0001180	0.396752	0.999997
FBgn0001185	0.19009	0.999997
FBgn0001186	0.0994649	0.999997
FBgn0001187	-0.00359938	0.999997
FBgn0001189	0.00732627	0.999997
FBgn0001197	0.452057	0.999997
FBgn0001202	0.10073	0.999997
FBgn0001206	0.0557289	0.999997
FBgn0001208	0.129545	0.999997
FBgn0001215	0.127436	0.999997
FBgn0001217	0.0705146	0.999997
FBgn0001218	0.474749	0.999997
FBgn0001220	-0.230177	0.999997
FBgn0001222	-0.169859	0.999997
FBgn0001224	0.136606	0.999997
FBgn0001225	-0.132836	0.999997
FBgn0001226	0.160081	0.999997
FBgn0001230	0.287616	0.999997
FBgn0001233	-0.117179	0.999997
FBgn0001234	0.518259	0.999997
FBgn0001235	0.351687	0.999997
FBgn0001247	-0.116456	0.999997
FBgn0001248	-0.114196	0.999997
FBgn0001250	0.172797	0.999997
FBgn0001254	0.302451	0.999997
FBgn0001255	0.121888	0.999997
FBgn0001257	0.273664	0.999997
FBgn0001258	0.0412736	0.999997
FBgn0001263	0.0485661	0.999997
FBgn0001276	-0.151629	0.999997
FBgn0001280	-0.122912	0.999997
FBgn0001281	0.103121	0.999997
FBgn0001285	-0.0738549	0.999997
FBgn0001291	0.0110557	0.999997
FBgn0001296	0.107767	0.999997
FBgn0001297	0.111115	0.999997
FBgn0001301	0.0467153	0.999997
FBgn0001308	0.034024	0.999997
FBgn0001316	0.400381	0.999997
FBgn0001324	-0.253564	0.999997
FBgn0001325	0.242456	0.999997
FBgn0001330	0.254153	0.999997
FBgn0001341	0.320418	0.999997
FBgn0001404	-0.0906202	0.999997
FBgn0001491	0.401492	0.999997
FBgn0001565	0.0126692	0.999997
FBgn0001612	0.103966	0.999997
FBgn0001624	0.417155	0.999997
FBgn0001941	-0.0685225	0.999997
FBgn0001942	0.158001	0.999997
FBgn0001961	-0.0739387	0.999997
FBgn0001965	0.0426132	0.999997
FBgn0001970	0.121035	0.999997
FBgn0001974	0.120099	0.999997
FBgn0001977	0.0449937	0.999997
FBgn0001978	-0.0545721	0.999997
FBgn0001981	0.387716	0.999997
FBgn0001986	0.147325	0.999997
FBgn0001987	0.278242	0.999997
FBgn0001989	0.0612537	0.999997
FBgn0001990	-0.00777493	0.999997
FBgn0001991	0.265612	0.999997
FBgn0001994	0.32366	0.999997
FBgn0001995	0.00223955	0.999997
FBgn0002021	0.0526823	0.999997
FBgn0002022	0.219124	0.999997
FBgn0002031	-0.226357	0.999997
FBgn0002036	-0.244954	0.999997
FBgn0002044	0.0249744	0.999997
FBgn0002069	-0.138448	0.999997
FBgn0002121	0.340675	0.999997
FBgn0002174	-0.0496445	0.999997
FBgn0002183	-0.227848	0.999997
FBgn0002283	-0.102353	0.999997
FBgn0002284	-0.0523081	0.999997
FBgn0002306	0.29644	0.999997
FBgn0002354	-0.244546	0.999997
FBgn0002413	0.192168	0.999997
FBgn0002431	0.147033	0.999997
FBgn0002441	-0.0136559	0.999997
FBgn0002466	0.275576	0.999997
FBgn0002521	0.46091	0.999997
FBgn0002522	-0.164089	0.999997
FBgn0002524	0.0308455	0.999997
FBgn0002525	0.285361	0.999997
FBgn0002526	0.279836	0.999997
FBgn0002542	0.0727657	0.999997
FBgn0002552	-0.14671	0.999997
FBgn0002563	-0.270088	0.999997
FBgn0002564	0.0661633	0.999997
FBgn0002566	0.169116	0.999997
FBgn0002567	-0.301385	0.999997
FBgn0002569	-0.0476696	0.999997
FBgn0002570	-0.0442725	0.999997
FBgn0002571	-0.124806	0.999997
FBgn0002578	-0.0268071	0.999997
FBgn0002579	-0.112227	0.999997
FBgn0002590	-0.00658787	0.999997
FBgn0002592	0.178489	0.999997
FBgn0002593	-0.015798	0.999997
FBgn0002607	-0.0390291	0.999997
FBgn0002609	0.196728	0.999997
FBgn0002622	-0.0832332	0.999997
FBgn0002626	-0.127511	0.999997
FBgn0002629	0.14213	0.999997
FBgn0002631	0.0580018	0.999997
FBgn0002633	0.0540831	0.999997
FBgn0002638	0.0262116	0.999997
FBgn0002641	-0.235074	0.999997
FBgn0002643	0.321334	0.999997
FBgn0002645	0.425779	0.999997
FBgn0002673	0.116905	0.999997
FBgn0002707	-0.228752	0.999997
FBgn0002709	-0.0364571	0.999997
FBgn0002715	0.0128769	0.999997
FBgn0002719	0.141548	0.999997
FBgn0002723	-0.234231	0.999997
FBgn0002732	0.243528	0.999997
FBgn0002733	0.148348	0.999997
FBgn0002734	-0.0278961	0.999997
FBgn0002735	0.0570293	0.999997
FBgn0002736	0.0831605	0.999997
FBgn0002772	0.0633189	0.999997
FBgn0002773	0.00778502	0.999997
FBgn0002774	0.230964	0.999997
FBgn0002775	-0.227885	0.999997
FBgn0002778	0.00206949	0.999997
FBgn0002780	0.40369	0.999997
FBgn0002781	-0.00854859	0.999997
FBgn0002783	-0.0255286	0.999997
FBgn0002787	-0.0850781	0.999997
FBgn0002789	-0.00239214	0.999997
FBgn0002791	-0.0696013	0.999997
FBgn0002862	-0.111324	0.999997
FBgn0002863	0.16863	0.999997
FBgn0002868	-0.0630767	0.999997
FBgn0002869	0.0951895	0.999997
FBgn0002872	0.0903801	0.999997
FBgn0002878	0.167317	0.999997
FBgn0002887	0.0163842	0.999997
FBgn0002891	0.105966	0.999997
FBgn0002899	0.00810836	0.999997
FBgn0002901	-0.132215	0.999997
FBgn0002905	-0.0666718	0.999997
FBgn0002906	-0.0309243	0.999997
FBgn0002914	-0.115043	0.999997
FBgn0002921	0.198713	0.999997
FBgn0002924	-0.256257	0.999997
FBgn0002930	-0.243662	0.999997
FBgn0002931	0.387231	0.999997
FBgn0002938	0.0537498	0.999997
FBgn0002939	0.0920465	0.999997
FBgn0002940	-0.157751	0.999997
FBgn0002945	0.262563	0.999997
FBgn0002948	-0.100406	0.999997
FBgn0002962	0.110223	0.999997
FBgn0002973	0.448753	0.999997
FBgn0002989	-0.0960569	0.999997
FBgn0003008	-0.0878136	0.999997
FBgn0003015	-0.0618967	0.999997
FBgn0003016	0.00736939	0.999997
FBgn0003023	0.108559	0.999997
FBgn0003028	-0.134351	0.999997
FBgn0003034	-0.205938	0.999997
FBgn0003041	0.258481	0.999997
FBgn0003042	0.0910091	0.999997
FBgn0003044	-0.041351	0.999997
FBgn0003048	0.327997	0.999997
FBgn0003053	0.0341561	0.999997
FBgn0003062	0.0797434	0.999997
FBgn0003068	0.0671909	0.999997
FBgn0003071	-0.121141	0.999997
FBgn0003074	-0.362817	0.999997
FBgn0003076	-0.301407	0.999997
FBgn0003079	0.049204	0.999997
FBgn0003087	0.0128241	0.999997
FBgn0003091	-0.0118768	0.999997
FBgn0003093	-0.210783	0.999997
FBgn0003114	-0.0213791	0.999997
FBgn0003116	0.0231258	0.999997
FBgn0003117	0.140517	0.999997
FBgn0003118	-0.154351	0.999997
FBgn0003124	0.0776451	0.999997
FBgn0003134	0.313452	0.999997
FBgn0003137	0.233422	0.999997
FBgn0003139	-0.0703064	0.999997
FBgn0003141	0.0126116	0.999997
FBgn0003145	0.121	0.999997
FBgn0003149	0.258814	0.999997
FBgn0003159	0.154538	0.999997
FBgn0003162	-0.0586792	0.999997
FBgn0003165	0.437584	0.999997
FBgn0003169	0.0106916	0.999997
FBgn0003175	0.0147573	0.999997
FBgn0003187	-0.185061	0.999997
FBgn0003189	0.0390388	0.999997
FBgn0003204	-0.186628	0.999997
FBgn0003205	0.213937	0.999997
FBgn0003206	0.339834	0.999997
FBgn0003209	0.375251	0.999997
FBgn0003210	0.0981173	0.999997
FBgn0003218	-0.0969081	0.999997
FBgn0003227	0.0582274	0.999997
FBgn0003231	-0.0454178	0.999997
FBgn0003250	0.121089	0.999997
FBgn0003254	0.200352	0.999997
FBgn0003256	0.354042	0.999997
FBgn0003257	-0.113586	0.999997
FBgn0003261	-0.0328326	0.999997
FBgn0003274	-0.0383785	0.999997
FBgn0003275	-0.0120164	0.999997
FBgn0003277	0.45924	0.999997
FBgn0003278	-0.167944	0.999997
FBgn0003279	-0.0670536	0.999997
FBgn0003285	0.300985	0.999997
FBgn0003292	-0.0910057	0.999997
FBgn0003301	0.345091	0.999997
FBgn0003302	-0.0669323	0.999997
FBgn0003308	0.131775	0.999997
FBgn0003310	0.274308	0.999997
FBgn0003312	0.133451	0.999997
FBgn0003317	0.0498067	0.999997
FBgn0003321	-0.138431	0.999997
FBgn0003326	0.193705	0.999997
FBgn0003328	-0.000158646	0.999997
FBgn0003330	0.0711642	0.999997
FBgn0003334	-0.177464	0.999997
FBgn0003345	0.0834187	0.999997
FBgn0003346	-0.123009	0.999997
FBgn0003353	-0.206857	0.999997
FBgn0003356	-0.0874101	0.999997
FBgn0003357	-0.0290755	0.999997
FBgn0003358	0.02799	0.999997
FBgn0003360	0.00238395	0.999997
FBgn0003371	0.419307	0.999997
FBgn0003380	-0.0808197	0.999997
FBgn0003392	0.180265	0.999997
FBgn0003401	0.0571782	0.999997
FBgn0003410	0.19692	0.999997
FBgn0003411	0.140506	0.999997
FBgn0003415	0.0458546	0.999997
FBgn0003416	0.351041	0.999997
FBgn0003423	-0.0262971	0.999997
FBgn0003429	-0.176703	0.999997
FBgn0003430	0.146233	0.999997
FBgn0003435	0.0995965	0.999997
FBgn0003444	0.16495	0.999997
FBgn0003447	0.367726	0.999997
FBgn0003449	0.0175356	0.999997
FBgn0003450	0.0337818	0.999997
FBgn0003459	0.0628883	0.999997
FBgn0003462	0.0124737	0.999997
FBgn0003463	0.393827	0.999997
FBgn0003464	-0.249894	0.999997
FBgn0003475	-0.09587	0.999997
FBgn0003479	-0.247327	0.999997
FBgn0003480	-0.0436776	0.999997
FBgn0003482	0.0551351	0.999997
FBgn0003483	0.023295	0.999997
FBgn0003486	0.0900254	0.999997
FBgn0003495	-0.020063	0.999997
FBgn0003502	0.454494	0.999997
FBgn0003507	0.247319	0.999997
FBgn0003512	0.0096537	0.999997
FBgn0003514	0.0657243	0.999997
FBgn0003515	-0.13277	0.999997
FBgn0003517	0.172262	0.999997
FBgn0003520	0.105424	0.999997
FBgn0003525	-0.143928	0.999997
FBgn0003527	-0.251717	0.999997
FBgn0003545	-0.00364817	0.999997
FBgn0003557	0.0610354	0.999997
FBgn0003559	-0.146344	0.999997
FBgn0003575	-0.0184946	0.999997
FBgn0003598	0.120718	0.999997
FBgn0003607	0.324898	0.999997
FBgn0003612	-0.0396364	0.999997
FBgn0003638	-0.0115612	0.999997
FBgn0003655	-0.0692835	0.999997
FBgn0003656	0.0389009	0.999997
FBgn0003660	-0.00696151	0.999997
FBgn0003676	-0.41773	0.999997
FBgn0003687	-0.146527	0.999997
FBgn0003701	0.0358314	0.999997
FBgn0003714	-0.20786	0.999997
FBgn0003716	0.390453	0.999997
FBgn0003721	0.221077	0.999997
FBgn0003733	-0.180457	0.999997
FBgn0003741	0.0296988	0.999997
FBgn0003742	0.0312686	0.999997
FBgn0003744	0.0086489	0.999997
FBgn0003748	-0.033939	0.999997
FBgn0003751	-0.200938	0.999997
FBgn0003861	-0.0933833	0.999997
FBgn0003862	0.35529	0.999997
FBgn0003863	0.00860225	0.999997
FBgn0003865	0.174064	0.999997
FBgn0003866	0.253296	0.999997
FBgn0003870	-0.00326845	0.999997
FBgn0003882	-0.00808029	0.999997
FBgn0003884	-0.0409643	0.999997
FBgn0003885	0.124225	0.999997
FBgn0003888	0.081796	0.999997
FBgn0003889	-0.111133	0.999997
FBgn0003890	-0.0313559	0.999997
FBgn0003891	0.0680142	0.999997
FBgn0003892	0.301451	0.999997
FBgn0003896	0.441156	0.999997
FBgn0003930	-0.284423	0.999997
FBgn0003931	-0.194954	0.999997
FBgn0003941	-0.0738633	0.999997
FBgn0003942	-0.0899546	0.999997
FBgn0003943	-0.0375402	0.999997
FBgn0003944	0.346817	0.999997
FBgn0003950	-0.213345	0.999997
FBgn0003961	0.00852717	0.999997
FBgn0003963	0.272772	0.999997
FBgn0003964	-0.0159396	0.999997
FBgn0003969	0.3436	0.999997
FBgn0003977	-0.0753258	0.999997
FBgn0003978	0.123839	0.999997
FBgn0003979	0.211407	0.999997
FBgn0003980	0.0472618	0.999997
FBgn0003983	-0.0381946	0.999997
FBgn0003984	0.453733	0.999997
FBgn0003996	-0.0375033	0.999997
FBgn0004045	0.0271725	0.999997
FBgn0004047	0.175085	0.999997
FBgn0004049	0.150716	0.999997
FBgn0004050	0.132342	0.999997
FBgn0004055	0.464457	0.999997
FBgn0004057	-0.121074	0.999997
FBgn0004066	-0.0442606	0.999997
FBgn0004087	-0.252055	0.999997
FBgn0004101	-0.236787	0.999997
FBgn0004103	0.279982	0.999997
FBgn0004106	0.209449	0.999997
FBgn0004107	-0.244491	0.999997
FBgn0004108	0.386588	0.999997
FBgn0004117	0.0502617	0.999997
FBgn0004132	-0.215204	0.999997
FBgn0004167	0.0987034	0.999997
FBgn0004169	0.0147036	0.999997
FBgn0004172	0.0458421	0.999997
FBgn0004173	-0.124866	0.999997
FBgn0004177	0.531321	0.999997
FBgn0004179	0.150623	0.999997
FBgn0004181	-0.267818	0.999997
FBgn0004187	-0.359749	0.999997
FBgn0004189	-0.0700145	0.999997
FBgn0004198	0.0886926	0.999997
FBgn0004227	0.272185	0.999997
FBgn0004228	0.126061	0.999997
FBgn0004237	-0.0107497	0.999997
FBgn0004240	0.0280788	0.999997
FBgn0004242	-0.123065	0.999997
FBgn0004244	0.112291	0.999997
FBgn0004359	0.201753	0.999997
FBgn0004362	0.0759382	0.999997
FBgn0004363	0.00364828	0.999997
FBgn0004367	-0.147387	0.999997
FBgn0004368	0.0623608	0.999997
FBgn0004369	-0.0648238	0.999997
FBgn0004370	0.214729	0.999997
FBgn0004373	0.375709	0.999997
FBgn0004374	-0.099091	0.999997
FBgn0004378	0.208196	0.999997
FBgn0004379	0.0159198	0.999997
FBgn0004380	-0.217506	0.999997
FBgn0004381	-0.154971	0.999997
FBgn0004387	-0.123246	0.999997
FBgn0004390	0.116276	0.999997
FBgn0004391	-0.0130774	0.999997
FBgn0004394	0.191958	0.999997
FBgn0004395	0.196706	0.999997
FBgn0004396	0.0839887	0.999997
FBgn0004397	-0.18307	0.999997
FBgn0004400	-0.0174064	0.999997
FBgn0004401	0.0833306	0.999997
FBgn0004403	-0.116546	0.999997
FBgn0004404	-0.0701115	0.999997
FBgn0004406	-3.06e-05	0.999997
FBgn0004414	0.0813964	0.999997
FBgn0004419	-0.0542668	0.999997
FBgn0004425	0.0450132	0.999997
FBgn0004426	-0.200765	0.999997
FBgn0004427	-0.037954	0.999997
FBgn0004428	0.0489463	0.999997
FBgn0004430	-0.00201535	0.999997
FBgn0004431	0.214983	0.999997
FBgn0004432	-0.0767047	0.999997
FBgn0004435	0.0931479	0.999997
FBgn0004436	0.000442915	0.999997
FBgn0004449	0.334509	0.999997
FBgn0004456	0.260231	0.999997
FBgn0004463	-0.0424468	0.999997
FBgn0004465	-0.36839	0.999997
FBgn0004507	-0.190009	0.999997
FBgn0004509	0.0614388	0.999997
FBgn0004510	-0.124969	0.999997
FBgn0004512	0.421719	0.999997
FBgn0004556	-0.0437215	0.999997
FBgn0004567	0.229374	0.999997
FBgn0004569	0.497015	0.999997
FBgn0004574	0.125005	0.999997
FBgn0004580	-0.267773	0.999997
FBgn0004583	-0.1506	0.999997
FBgn0004584	-0.193091	0.999997
FBgn0004587	0.0379113	0.999997
FBgn0004595	0.400852	0.999997
FBgn0004597	0.026706	0.999997
FBgn0004598	0.166475	0.999997
FBgn0004606	0.156065	0.999997
FBgn0004607	0.380417	0.999997
FBgn0004611	-0.210905	0.999997
FBgn0004623	0.157513	0.999997
FBgn0004636	0.0841621	0.999997
FBgn0004638	0.315051	0.999997
FBgn0004643	-0.429588	0.999997
FBgn0004644	0.20041	0.999997
FBgn0004647	0.102525	0.999997
FBgn0004648	0.219143	0.999997
FBgn0004649	-0.300406	0.999997
FBgn0004650	-0.0659551	0.999997
FBgn0004652	-0.0600313	0.999997
FBgn0004654	-0.0824175	0.999997
FBgn0004655	0.00366679	0.999997
FBgn0004656	0.267485	0.999997
FBgn0004657	0.308828	0.999997
FBgn0004687	0.451207	0.999997
FBgn0004698	0.121696	0.999997
FBgn0004795	0.263832	0.999997
FBgn0004797	-0.12547	0.999997
FBgn0004811	-0.0255408	0.999997
FBgn0004828	0.100451	0.999997
FBgn0004832	-0.187779	0.999997
FBgn0004837	0.0932459	0.999997
FBgn0004838	0.343432	0.999997
FBgn0004839	0.0415613	0.999997
FBgn0004852	-0.0678939	0.999997
FBgn0004855	0.044811	0.999997
FBgn0004856	-0.065641	0.999997
FBgn0004858	0.0287699	0.999997
FBgn0004860	-0.133892	0.999997
FBgn0004861	0.467228	0.999997
FBgn0004864	-0.0884419	0.999997
FBgn0004865	0.00933991	0.999997
FBgn0004867	0.0699638	0.999997
FBgn0004868	0.235373	0.999997
FBgn0004872	-0.15709	0.999997
FBgn0004875	-0.0378258	0.999997
FBgn0004876	-0.206357	0.999997
FBgn0004878	0.26917	0.999997
FBgn0004880	0.026065	0.999997
FBgn0004882	-0.167693	0.999997
FBgn0004885	0.162958	0.999997
FBgn0004888	-0.0456086	0.999997
FBgn0004889	0.124387	0.999997
FBgn0004892	0.0491879	0.999997
FBgn0004893	0.418647	0.999997
FBgn0004901	-0.303855	0.999997
FBgn0004903	0.0574377	0.999997
FBgn0004907	0.163761	0.999997
FBgn0004908	0.0780759	0.999997
FBgn0004910	0.0391607	0.999997
FBgn0004913	-0.313972	0.999997
FBgn0004914	0.141286	0.999997
FBgn0004915	0.0339434	0.999997
FBgn0004919	0.0790636	0.999997
FBgn0004921	-0.0337925	0.999997
FBgn0004924	0.476369	0.999997
FBgn0004926	0.0679188	0.999997
FBgn0004957	0.0213122	0.999997
FBgn0004959	0.477584	0.999997
FBgn0005198	0.0642063	0.999997
FBgn0005278	0.182489	0.999997
FBgn0005322	-0.195785	0.999997
FBgn0005355	-0.139252	0.999997
FBgn0005386	0.460532	0.999997
FBgn0005390	-0.341669	0.999997
FBgn0005391	0.0955856	0.999997
FBgn0005411	0.0334362	0.999997
FBgn0005427	0.0346994	0.999997
FBgn0005533	-0.0628026	0.999997
FBgn0005536	0.04269	0.999997
FBgn0005585	-0.0448593	0.999997
FBgn0005593	-0.215116	0.999997
FBgn0005596	0.141679	0.999997
FBgn0005612	0.117317	0.999997
FBgn0005614	-0.0451928	0.999997
FBgn0005616	0.429626	0.999997
FBgn0005617	-0.0741159	0.999997
FBgn0005624	0.369468	0.999997
FBgn0005626	0.11565	0.999997
FBgn0005632	0.0713949	0.999997
FBgn0005640	0.296298	0.999997
FBgn0005642	-0.267185	0.999997
FBgn0005648	0.415291	0.999997
FBgn0005649	0.158017	0.999997
FBgn0005655	-0.178477	0.999997
FBgn0005660	0.0274333	0.999997
FBgn0005664	0.000841654	0.999997
FBgn0005666	0.152345	0.999997
FBgn0005670	-0.0703146	0.999997
FBgn0005671	-0.15729	0.999997
FBgn0005672	0.331551	0.999997
FBgn0005674	-0.261781	0.999997
FBgn0005683	-0.320581	0.999997
FBgn0005694	-0.0533518	0.999997
FBgn0005695	0.0904791	0.999997
FBgn0005696	-0.396666	0.999997
FBgn0005775	0.20859	0.999997
FBgn0005777	0.0473111	0.999997
FBgn0008635	-0.350116	0.999997
FBgn0008636	0.354601	0.999997
FBgn0010019	-0.0155589	0.999997
FBgn0010038	-0.0448155	0.999997
FBgn0010039	-0.0322474	0.999997
FBgn0010040	-0.0269435	0.999997
FBgn0010041	0.340932	0.999997
FBgn0010042	0.255319	0.999997
FBgn0010043	-0.0195486	0.999997
FBgn0010044	0.0434403	0.999997
FBgn0010051	-0.175456	0.999997
FBgn0010052	0.398989	0.999997
FBgn0010053	-0.132211	0.999997
FBgn0010078	-0.07353	0.999997
FBgn0010097	-0.171142	0.999997
FBgn0010100	0.187904	0.999997
FBgn0010105	0.463406	0.999997
FBgn0010113	0.0767067	0.999997
FBgn0010173	-0.197424	0.999997
FBgn0010194	0.474822	0.999997
FBgn0010198	-0.00182368	0.999997
FBgn0010213	-0.0239431	0.999997
FBgn0010215	0.503472	0.999997
FBgn0010217	0.0464409	0.999997
FBgn0010220	0.0462594	0.999997
FBgn0010222	-0.112926	0.999997
FBgn0010223	0.0404666	0.999997
FBgn0010225	0.0445852	0.999997
FBgn0010226	0.0691031	0.999997
FBgn0010228	0.387299	0.999997
FBgn0010235	0.011472	0.999997
FBgn0010241	-0.0380362	0.999997
FBgn0010246	0.00211039	0.999997
FBgn0010247	0.50332	0.999997
FBgn0010263	-0.0572429	0.999997
FBgn0010265	-0.0644474	0.999997
FBgn0010269	-0.209872	0.999997
FBgn0010278	-0.191543	0.999997
FBgn0010280	0.260993	0.999997
FBgn0010282	0.126335	0.999997
FBgn0010287	0.507841	0.999997
FBgn0010288	-0.258755	0.999997
FBgn0010292	-0.153904	0.999997
FBgn0010300	0.26224	0.999997
FBgn0010303	0.0598876	0.999997
FBgn0010309	0.113624	0.999997
FBgn0010313	0.31536	0.999997
FBgn0010314	-0.0817637	0.999997
FBgn0010315	-0.027873	0.999997
FBgn0010316	0.232958	0.999997
FBgn0010317	0.100737	0.999997
FBgn0010328	-0.11345	0.999997
FBgn0010333	0.212837	0.999997
FBgn0010339	-0.256339	0.999997
FBgn0010340	-0.101509	0.999997
FBgn0010341	0.244771	0.999997
FBgn0010342	-0.00735379	0.999997
FBgn0010350	0.0201476	0.999997
FBgn0010352	-0.0732984	0.999997
FBgn0010355	0.0894951	0.999997
FBgn0010356	-0.111531	0.999997
FBgn0010357	-0.0723132	0.999997
FBgn0010358	0.0677044	0.999997
FBgn0010379	0.136728	0.999997
FBgn0010380	-0.129743	0.999997
FBgn0010382	0.21991	0.999997
FBgn0010385	0.231504	0.999997
FBgn0010387	-0.0408149	0.999997
FBgn0010388	0.0080874	0.999997
FBgn0010389	0.426406	0.999997
FBgn0010391	-0.455005	0.999997
FBgn0010395	0.0892664	0.999997
FBgn0010397	0.0302978	0.999997
FBgn0010398	-0.251832	0.999997
FBgn0010401	-0.0266425	0.999997
FBgn0010403	-0.0559539	0.999997
FBgn0010406	-0.0794861	0.999997
FBgn0010408	-0.217263	0.999997
FBgn0010409	-0.135682	0.999997
FBgn0010411	-0.0881799	0.999997
FBgn0010412	-0.163072	0.999997
FBgn0010415	0.254633	0.999997
FBgn0010417	-0.0412131	0.999997
FBgn0010421	0.204204	0.999997
FBgn0010422	0.0668633	0.999997
FBgn0010423	0.170747	0.999997
FBgn0010424	0.0326803	0.999997
FBgn0010425	-0.0541286	0.999997
FBgn0010431	0.460587	0.999997
FBgn0010434	0.0891951	0.999997
FBgn0010435	0.143936	0.999997
FBgn0010438	-0.367151	0.999997
FBgn0010441	-0.162683	0.999997
FBgn0010452	0.219221	0.999997
FBgn0010453	0.460877	0.999997
FBgn0010470	0.0902269	0.999997
FBgn0010473	0.419478	0.999997
FBgn0010482	0.0381036	0.999997
FBgn0010488	0.138127	0.999997
FBgn0010497	-0.0271107	0.999997
FBgn0010501	0.375791	0.999997
FBgn0010504	0.231445	0.999997
FBgn0010516	0.022363	0.999997
FBgn0010520	-0.175604	0.999997
FBgn0010531	-0.324993	0.999997
FBgn0010548	0.0377099	0.999997
FBgn0010549	-0.0306006	0.999997
FBgn0010551	-0.247404	0.999997
FBgn0010575	0.202744	0.999997
FBgn0010583	-0.0870986	0.999997
FBgn0010590	0.0204413	0.999997
FBgn0010591	-0.10577	0.999997
FBgn0010602	-0.282552	0.999997
FBgn0010607	0.0101289	0.999997
FBgn0010611	-0.187491	0.999997
FBgn0010612	0.0206364	0.999997
FBgn0010620	0.0646801	0.999997
FBgn0010621	-0.126242	0.999997
FBgn0010622	0.0569123	0.999997
FBgn0010638	0.0193203	0.999997
FBgn0010651	0.0535847	0.999997
FBgn0010660	0.15143	0.999997
FBgn0010741	-0.243529	0.999997
FBgn0010747	0.147213	0.999997
FBgn0010750	-0.0659529	0.999997
FBgn0010762	0.19512	0.999997
FBgn0010768	-0.0592174	0.999997
FBgn0010770	0.220644	0.999997
FBgn0010772	0.262363	0.999997
FBgn0010774	0.0692348	0.999997
FBgn0010786	-0.34814	0.999997
FBgn0010803	-0.159627	0.999997
FBgn0010808	-0.0108733	0.999997
FBgn0010812	-0.119177	0.999997
FBgn0010825	0.139058	0.999997
FBgn0010830	-0.400667	0.999997
FBgn0010877	-0.0267916	0.999997
FBgn0010894	0.0820315	0.999997
FBgn0010905	-0.0782118	0.999997
FBgn0010909	0.0113029	0.999997
FBgn0010926	0.00154173	0.999997
FBgn0011016	0.091245	0.999997
FBgn0011020	-0.158629	0.999997
FBgn0011202	-0.0476496	0.999997
FBgn0011204	0.532806	0.999997
FBgn0011205	-0.0475413	0.999997
FBgn0011206	0.207681	0.999997
FBgn0011207	0.116328	0.999997
FBgn0011211	0.00255787	0.999997
FBgn0011217	0.22477	0.999997
FBgn0011224	0.326627	0.999997
FBgn0011225	0.0351128	0.999997
FBgn0011227	-0.0217683	0.999997
FBgn0011230	-0.0748403	0.999997
FBgn0011232	-0.397453	0.999997
FBgn0011236	-0.339505	0.999997
FBgn0011241	-0.162573	0.999997
FBgn0011259	0.371872	0.999997
FBgn0011260	0.314179	0.999997
FBgn0011272	-0.185868	0.999997
FBgn0011274	0.0968185	0.999997
FBgn0011280	-0.1814	0.999997
FBgn0011281	-0.0448005	0.999997
FBgn0011284	-0.0838813	0.999997
FBgn0011289	-0.0543486	0.999997
FBgn0011290	-0.0338389	0.999997
FBgn0011291	0.169666	0.999997
FBgn0011293	-0.146675	0.999997
FBgn0011296	0.157693	0.999997
FBgn0011297	-0.247997	0.999997
FBgn0011300	0.0621338	0.999997
FBgn0011305	0.0123153	0.999997
FBgn0011327	0.35677	0.999997
FBgn0011335	-0.0148162	0.999997
FBgn0011336	0.131396	0.999997
FBgn0011361	-0.167771	0.999997
FBgn0011455	0.098232	0.999997
FBgn0011474	0.124888	0.999997
FBgn0011476	-0.175554	0.999997
FBgn0011481	0.301011	0.999997
FBgn0011509	0.232575	0.999997
FBgn0011554	-0.103646	0.999997
FBgn0011555	0.043309	0.999997
FBgn0011556	-0.100374	0.999997
FBgn0011566	-0.371031	0.999997
FBgn0011570	-0.0540228	0.999997
FBgn0011571	0.44422	0.999997
FBgn0011573	0.00350544	0.999997
FBgn0011576	0.0596845	0.999997
FBgn0011584	0.00764	0.999997
FBgn0011586	0.430276	0.999997
FBgn0011592	0.184448	0.999997
FBgn0011603	-0.0290688	0.999997
FBgn0011604	0.150753	0.999997
FBgn0011606	-0.201377	0.999997
FBgn0011638	-0.323772	0.999997
FBgn0011640	0.102898	0.999997
FBgn0011642	0.0922856	0.999997
FBgn0011648	0.202513	0.999997
FBgn0011653	0.385742	0.999997
FBgn0011655	-0.111665	0.999997
FBgn0011656	0.0701523	0.999997
FBgn0011659	-0.233305	0.999997
FBgn0011660	-0.217461	0.999997
FBgn0011661	0.0709633	0.999997
FBgn0011666	0.386979	0.999997
FBgn0011668	-0.186161	0.999997
FBgn0011669	0.0226349	0.999997
FBgn0011670	0.103407	0.999997
FBgn0011672	-0.0645139	0.999997
FBgn0011674	0.109413	0.999997
FBgn0011692	-0.240941	0.999997
FBgn0011693	-0.0835774	0.999997
FBgn0011694	-0.0717495	0.999997
FBgn0011695	0.0509041	0.999997
FBgn0011703	-0.20773	0.999997
FBgn0011704	-0.200341	0.999997
FBgn0011705	0.263976	0.999997
FBgn0011706	0.161317	0.999997
FBgn0011708	-0.219455	0.999997
FBgn0011710	-0.0277214	0.999997
FBgn0011715	-0.0686062	0.999997
FBgn0011725	-0.00236566	0.999997
FBgn0011726	-0.0204094	0.999997
FBgn0011737	0.160335	0.999997
FBgn0011739	0.282083	0.999997
FBgn0011740	-0.190081	0.999997
FBgn0011741	-0.0771757	0.999997
FBgn0011742	0.278183	0.999997
FBgn0011745	-0.255847	0.999997
FBgn0011746	0.0455078	0.999997
FBgn0011747	0.371686	0.999997
FBgn0011754	-0.134573	0.999997
FBgn0011760	0.489959	0.999997
FBgn0011761	-0.423551	0.999997
FBgn0011762	0.0559787	0.999997
FBgn0011763	-0.00434191	0.999997
FBgn0011766	0.479957	0.999997
FBgn0011768	0.0359134	0.999997
FBgn0011769	-0.161718	0.999997
FBgn0011770	-0.101205	0.999997
FBgn0011771	-0.242137	0.999997
FBgn0011774	-0.0984667	0.999997
FBgn0011785	0.136455	0.999997
FBgn0011787	-0.246748	0.999997
FBgn0011802	0.00965142	0.999997
FBgn0011817	0.215149	0.999997
FBgn0011818	0.119674	0.999997
FBgn0011822	0.0268162	0.999997
FBgn0011824	0.142824	0.999997
FBgn0011826	-0.161625	0.999997
FBgn0011834	0.228945	0.999997
FBgn0011836	0.227802	0.999997
FBgn0011837	0.120086	0.999997
FBgn0012034	-0.161517	0.999997
FBgn0012036	-0.0431586	0.999997
FBgn0012037	0.0829407	0.999997
FBgn0012042	0.071461	0.999997
FBgn0012051	0.10767	0.999997
FBgn0012058	0.164289	0.999997
FBgn0012344	0.109027	0.999997
FBgn0013263	0.322738	0.999997
FBgn0013269	-0.0676133	0.999997
FBgn0013272	0.163447	0.999997
FBgn0013276	0.253524	0.999997
FBgn0013278	0.0511829	0.999997
FBgn0013303	0.0406596	0.999997
FBgn0013305	0.111852	0.999997
FBgn0013325	-0.13941	0.999997
FBgn0013334	0.177351	0.999997
FBgn0013342	-0.169055	0.999997
FBgn0013343	0.281	0.999997
FBgn0013347	0.0162211	0.999997
FBgn0013432	-0.0330972	0.999997
FBgn0013435	-0.110952	0.999997
FBgn0013469	0.0490001	0.999997
FBgn0013531	-0.137547	0.999997
FBgn0013548	-0.302004	0.999997
FBgn0013563	0.0128676	0.999997
FBgn0013576	0.149591	0.999997
FBgn0013674	0.266422	0.999997
FBgn0013675	0.370675	0.999997
FBgn0013683	0.223942	0.999997
FBgn0013688	0.459673	0.999997
FBgn0013689	0.120358	0.999997
FBgn0013693	0.0038193	0.999997
FBgn0013694	0.0497084	0.999997
FBgn0013695	0.147494	0.999997
FBgn0013696	0.21841	0.999997
FBgn0013697	0.371384	0.999997
FBgn0013698	0.0512469	0.999997
FBgn0013700	-0.0619093	0.999997
FBgn0013701	0.0441138	0.999997
FBgn0013704	-0.246114	0.999997
FBgn0013705	-0.088317	0.999997
FBgn0013709	0.16821	0.999997
FBgn0013710	0.141736	0.999997
FBgn0013717	0.224226	0.999997
FBgn0013718	0.0666724	0.999997
FBgn0013720	-0.123481	0.999997
FBgn0013726	0.0390118	0.999997
FBgn0013732	-0.192517	0.999997
FBgn0013733	0.203671	0.999997
FBgn0013746	0.102497	0.999997
FBgn0013749	0.113789	0.999997
FBgn0013750	0.103874	0.999997
FBgn0013753	-0.0356457	0.999997
FBgn0013756	0.346535	0.999997
FBgn0013759	-0.0985067	0.999997
FBgn0013762	-0.0255542	0.999997
FBgn0013763	-0.066791	0.999997
FBgn0013764	-0.0243937	0.999997
FBgn0013765	0.0137463	0.999997
FBgn0013773	0.104208	0.999997
FBgn0013799	-0.0836081	0.999997
FBgn0013949	-0.0138513	0.999997
FBgn0013953	0.193206	0.999997
FBgn0013954	-0.0803409	0.999997
FBgn0013981	-0.00043587	0.999997
FBgn0013983	0.0492564	0.999997
FBgn0013987	-0.0105059	0.999997
FBgn0013995	0.00845922	0.999997
FBgn0013997	0.409703	0.999997
FBgn0014000	0.068582	0.999997
FBgn0014002	-0.0757897	0.999997
FBgn0014006	-0.274554	0.999997
FBgn0014007	0.347684	0.999997
FBgn0014009	0.147964	0.999997
FBgn0014010	0.120393	0.999997
FBgn0014011	0.122773	0.999997
FBgn0014018	-0.0835233	0.999997
FBgn0014020	0.161868	0.999997
FBgn0014022	0.222221	0.999997
FBgn0014023	-0.108055	0.999997
FBgn0014024	-0.196955	0.999997
FBgn0014026	-0.0987895	0.999997
FBgn0014028	-0.0734122	0.999997
FBgn0014029	-0.0960821	0.999997
FBgn0014031	0.011325	0.999997
FBgn0014032	-0.24177	0.999997
FBgn0014037	0.151575	0.999997
FBgn0014075	-0.1242	0.999997
FBgn0014092	-0.00434642	0.999997
FBgn0014127	-0.160437	0.999997
FBgn0014133	0.11529	0.999997
FBgn0014135	-0.0078182	0.999997
FBgn0014141	0.0409266	0.999997
FBgn0014143	0.405064	0.999997
FBgn0014163	0.386752	0.999997
FBgn0014184	0.165186	0.999997
FBgn0014189	0.0713189	0.999997
FBgn0014269	0.0538693	0.999997
FBgn0014340	0.127564	0.999997
FBgn0014342	-0.103932	0.999997
FBgn0014343	0.393311	0.999997
FBgn0014366	0.0497339	0.999997
FBgn0014380	0.0770744	0.999997
FBgn0014388	0.213946	0.999997
FBgn0014391	0.119912	0.999997
FBgn0014396	-0.0980898	0.999997
FBgn0014411	0.0833714	0.999997
FBgn0014417	0.0864379	0.999997
FBgn0014427	-0.051605	0.999997
FBgn0014455	-0.395432	0.999997
FBgn0014469	-0.12335	0.999997
FBgn0014857	0.0354876	0.999997
FBgn0014861	-0.0668226	0.999997
FBgn0014863	0.0806894	0.999997
FBgn0014865	0.0326219	0.999997
FBgn0014868	-0.181034	0.999997
FBgn0014869	-0.196513	0.999997
FBgn0014870	0.352322	0.999997
FBgn0014877	-0.000346884	0.999997
FBgn0014879	0.00276197	0.999997
FBgn0014903	-0.066159	0.999997
FBgn0014906	0.11897	0.999997
FBgn0014930	-0.134808	0.999997
FBgn0014931	0.337466	0.999997
FBgn0015000	-0.213186	0.999997
FBgn0015001	-0.0521699	0.999997
FBgn0015010	-0.0336346	0.999997
FBgn0015011	-0.110055	0.999997
FBgn0015019	-0.310414	0.999997
FBgn0015024	0.432236	0.999997
FBgn0015025	0.235841	0.999997
FBgn0015031	-0.192672	0.999997
FBgn0015033	0.0289284	0.999997
FBgn0015035	-0.00134301	0.999997
FBgn0015036	-0.186328	0.999997
FBgn0015037	0.076223	0.999997
FBgn0015038	-0.0733817	0.999997
FBgn0015039	-0.0397462	0.999997
FBgn0015040	0.0920729	0.999997
FBgn0015075	0.0183906	0.999997
FBgn0015218	-0.13149	0.999997
FBgn0015221	-0.0372709	0.999997
FBgn0015222	0.020389	0.999997
FBgn0015229	0.136334	0.999997
FBgn0015239	0.534858	0.999997
FBgn0015240	-0.0542414	0.999997
FBgn0015245	-0.316945	0.999997
FBgn0015247	-0.0542242	0.999997
FBgn0015268	-0.289815	0.999997
FBgn0015269	-0.00529566	0.999997
FBgn0015270	-0.0455261	0.999997
FBgn0015271	-0.0957024	0.999997
FBgn0015277	-0.123055	0.999997
FBgn0015278	-0.14879	0.999997
FBgn0015279	-0.139129	0.999997
FBgn0015282	-0.226102	0.999997
FBgn0015283	-0.184927	0.999997
FBgn0015286	0.423361	0.999997
FBgn0015288	0.263247	0.999997
FBgn0015295	-0.0173362	0.999997
FBgn0015296	-0.204036	0.999997
FBgn0015298	-0.267738	0.999997
FBgn0015299	-0.177361	0.999997
FBgn0015316	-0.139419	0.999997
FBgn0015320	0.393238	0.999997
FBgn0015321	0.0700051	0.999997
FBgn0015331	-0.0461962	0.999997
FBgn0015336	-0.213668	0.999997
FBgn0015338	-0.159463	0.999997
FBgn0015351	-0.0340532	0.999997
FBgn0015359	-0.17377	0.999997
FBgn0015360	-0.102132	0.999997
FBgn0015371	0.324187	0.999997
FBgn0015372	-0.0736322	0.999997
FBgn0015376	-0.257988	0.999997
FBgn0015379	-0.329174	0.999997
FBgn0015380	0.388395	0.999997
FBgn0015391	0.348814	0.999997
FBgn0015396	0.05675	0.999997
FBgn0015399	0.25634	0.999997
FBgn0015402	0.0157865	0.999997
FBgn0015477	0.158431	0.999997
FBgn0015509	0.0734254	0.999997
FBgn0015513	-0.13742	0.999997
FBgn0015520	0.340577	0.999997
FBgn0015521	0.00345284	0.999997
FBgn0015522	0.171802	0.999997
FBgn0015527	0.0370721	0.999997
FBgn0015541	-0.132099	0.999997
FBgn0015543	-0.119428	0.999997
FBgn0015544	-0.241661	0.999997
FBgn0015546	0.0658399	0.999997
FBgn0015553	-0.249438	0.999997
FBgn0015558	0.254112	0.999997
FBgn0015568	0.102605	0.999997
FBgn0015569	0.0415455	0.999997
FBgn0015571	-0.0723128	0.999997
FBgn0015572	0.174382	0.999997
FBgn0015575	0.0106366	0.999997
FBgn0015576	0.0885575	0.999997
FBgn0015577	0.0638136	0.999997
FBgn0015582	-0.365961	0.999997
FBgn0015584	0.0387641	0.999997
FBgn0015585	-0.0365192	0.999997
FBgn0015589	-0.304391	0.999997
FBgn0015591	0.0595729	0.999997
FBgn0015600	-0.023106	0.999997
FBgn0015602	-0.00390606	0.999997
FBgn0015609	0.296808	0.999997
FBgn0015614	0.02996	0.999997
FBgn0015615	0.0793473	0.999997
FBgn0015618	0.0206387	0.999997
FBgn0015621	-0.195974	0.999997
FBgn0015622	-0.167142	0.999997
FBgn0015623	-0.00377512	0.999997
FBgn0015625	-0.117552	0.999997
FBgn0015663	0.0271965	0.999997
FBgn0015664	0.26846	0.999997
FBgn0015714	-0.0594272	0.999997
FBgn0015737	0.0698589	0.999997
FBgn0015754	-0.206317	0.999997
FBgn0015756	-0.124873	0.999997
FBgn0015765	-0.0195382	0.999997
FBgn0015766	0.0151395	0.999997
FBgn0015772	0.0244048	0.999997
FBgn0015773	0.267456	0.999997
FBgn0015774	0.23006	0.999997
FBgn0015776	0.136963	0.999997
FBgn0015777	0.0967544	0.999997
FBgn0015778	0.164167	0.999997
FBgn0015781	-0.242353	0.999997
FBgn0015789	-0.166012	0.999997
FBgn0015790	0.189799	0.999997
FBgn0015791	-0.106422	0.999997
FBgn0015793	-0.0803056	0.999997
FBgn0015794	-0.133532	0.999997
FBgn0015795	-0.0518237	0.999997
FBgn0015797	-0.126888	0.999997
FBgn0015799	-0.134643	0.999997
FBgn0015801	-0.0196736	0.999997
FBgn0015803	0.168754	0.999997
FBgn0015805	0.198477	0.999997
FBgn0015808	0.0929717	0.999997
FBgn0015818	0.0595735	0.999997
FBgn0015828	-0.178035	0.999997
FBgn0015829	0.0706674	0.999997
FBgn0015834	0.0167981	0.999997
FBgn0015838	-0.0493607	0.999997
FBgn0015872	-0.0158245	0.999997
FBgn0015903	0.0625791	0.999997
FBgn0015904	-0.00893766	0.999997
FBgn0015905	0.295222	0.999997
FBgn0015919	0.129817	0.999997
FBgn0015924	-0.0122069	0.999997
FBgn0015925	-0.0979644	0.999997
FBgn0015926	-0.000934993	0.999997
FBgn0015929	-0.287571	0.999997
FBgn0016031	-0.104603	0.999997
FBgn0016034	-0.0695617	0.999997
FBgn0016038	-0.153969	0.999997
FBgn0016041	0.0851783	0.999997
FBgn0016053	-0.187862	0.999997
FBgn0016054	-0.0728065	0.999997
FBgn0016059	-0.0414301	0.999997
FBgn0016070	-0.0213262	0.999997
FBgn0016075	0.0340742	0.999997
FBgn0016076	0.0437225	0.999997
FBgn0016078	-0.0131517	0.999997
FBgn0016080	0.10656	0.999997
FBgn0016081	-0.193687	0.999997
FBgn0016119	-0.0462091	0.999997
FBgn0016120	-0.22322	0.999997
FBgn0016122	0.268422	0.999997
FBgn0016123	0.175012	0.999997
FBgn0016126	-0.0798612	0.999997
FBgn0016131	0.11849	0.999997
FBgn0016641	-0.362798	0.999997
FBgn0016650	-0.264935	0.999997
FBgn0016672	-0.0726155	0.999997
FBgn0016684	0.0797938	0.999997
FBgn0016685	-0.00413403	0.999997
FBgn0016687	-0.248437	0.999997
FBgn0016691	-0.0149158	0.999997
FBgn0016693	-0.158612	0.999997
FBgn0016694	0.0273636	0.999997
FBgn0016696	-0.13439	0.999997
FBgn0016697	-0.118108	0.999997
FBgn0016698	-0.298115	0.999997
FBgn0016700	0.235186	0.999997
FBgn0016701	0.0362659	0.999997
FBgn0016715	0.0701669	0.999997
FBgn0016726	-0.0232944	0.999997
FBgn0016754	0.374724	0.999997
FBgn0016756	0.0385733	0.999997
FBgn0016762	-0.0246359	0.999997
FBgn0016794	0.00239253	0.999997
FBgn0016797	0.469824	0.999997
FBgn0016917	-0.00944348	0.999997
FBgn0016926	0.317815	0.999997
FBgn0016930	0.189657	0.999997
FBgn0016970	-0.0800979	0.999997
FBgn0016974	-0.0804033	0.999997
FBgn0016977	0.409565	0.999997
FBgn0016978	0.128297	0.999997
FBgn0016983	0.0570701	0.999997
FBgn0016984	-0.161312	0.999997
FBgn0017414	0.00415918	0.999997
FBgn0017418	0.180113	0.999997
FBgn0017429	-0.345285	0.999997
FBgn0017430	0.127821	0.999997
FBgn0017448	-0.00256022	0.999997
FBgn0017457	0.0463373	0.999997
FBgn0017482	0.133747	0.999997
FBgn0017545	-0.0711873	0.999997
FBgn0017550	0.136341	0.999997
FBgn0017551	-0.107178	0.999997
FBgn0017558	0.0308118	0.999997
FBgn0017561	-0.0813486	0.999997
FBgn0017566	0.0132007	0.999997
FBgn0017567	-0.0363089	0.999997
FBgn0017572	0.0822435	0.999997
FBgn0017577	-0.0423969	0.999997
FBgn0017578	0.0738606	0.999997
FBgn0017579	-0.113043	0.999997
FBgn0017581	0.0333502	0.999997
FBgn0019624	-0.0765566	0.999997
FBgn0019637	-0.202441	0.999997
FBgn0019643	0.0244848	0.999997
FBgn0019644	-0.0493927	0.999997
FBgn0019650	0.210556	0.999997
FBgn0019661	0.312461	0.999997
FBgn0019662	0.15381	0.999997
FBgn0019686	-0.0629743	0.999997
FBgn0019828	-0.0719953	0.999997
FBgn0019830	-0.0113268	0.999997
FBgn0019890	0.277214	0.999997
FBgn0019925	0.00107966	0.999997
FBgn0019928	-0.072733	0.999997
FBgn0019929	0.00498358	0.999997
FBgn0019932	0.0433036	0.999997
FBgn0019936	-0.0901871	0.999997
FBgn0019938	-0.531947	0.999997
FBgn0019940	0.138633	0.999997
FBgn0019947	-0.115261	0.999997
FBgn0019949	0.00349295	0.999997
FBgn0019952	-0.0254977	0.999997
FBgn0019957	-0.094361	0.999997
FBgn0019960	-0.2309	0.999997
FBgn0019968	0.25088	0.999997
FBgn0019972	0.107168	0.999997
FBgn0019982	-0.378432	0.999997
FBgn0019990	0.0363553	0.999997
FBgn0020018	-0.343482	0.999997
FBgn0020224	-0.00153957	0.999997
FBgn0020235	-0.202357	0.999997
FBgn0020236	0.0126518	0.999997
FBgn0020238	0.25897	0.999997
FBgn0020248	-0.223694	0.999997
FBgn0020249	0.199519	0.999997
FBgn0020251	0.0483695	0.999997
FBgn0020255	0.0365039	0.999997
FBgn0020257	0.366352	0.999997
FBgn0020261	-0.0834863	0.999997
FBgn0020270	-0.0370594	0.999997
FBgn0020272	-0.0385473	0.999997
FBgn0020278	-0.0205702	0.999997
FBgn0020279	0.334164	0.999997
FBgn0020299	0.326423	0.999997
FBgn0020304	-0.0516902	0.999997
FBgn0020305	-0.322873	0.999997
FBgn0020306	0.169994	0.999997
FBgn0020307	0.348309	0.999997
FBgn0020309	-0.0114028	0.999997
FBgn0020312	-0.1021	0.999997
FBgn0020369	-0.236239	0.999997
FBgn0020370	-0.0359523	0.999997
FBgn0020372	0.00202958	0.999997
FBgn0020377	0.206838	0.999997
FBgn0020378	-0.0378812	0.999997
FBgn0020379	-0.207185	0.999997
FBgn0020381	-0.10454	0.999997
FBgn0020385	-0.135866	0.999997
FBgn0020386	0.236727	0.999997
FBgn0020388	-0.000836022	0.999997
FBgn0020389	0.0138402	0.999997
FBgn0020392	-0.136281	0.999997
FBgn0020407	-0.196002	0.999997
FBgn0020412	0.221386	0.999997
FBgn0020414	-0.0387326	0.999997
FBgn0020415	-0.119964	0.999997
FBgn0020416	-0.184031	0.999997
FBgn0020440	0.114012	0.999997
FBgn0020443	0.0477046	0.999997
FBgn0020445	0.0933678	0.999997
FBgn0020493	-0.0103026	0.999997
FBgn0020496	0.307988	0.999997
FBgn0020497	0.334137	0.999997
FBgn0020503	0.207888	0.999997
FBgn0020508	0.0047615	0.999997
FBgn0020509	-0.0688916	0.999997
FBgn0020510	0.00417647	0.999997
FBgn0020513	0.0454006	0.999997
FBgn0020521	0.207985	0.999997
FBgn0020545	-0.110871	0.999997
FBgn0020616	-0.11843	0.999997
FBgn0020618	-0.00919217	0.999997
FBgn0020620	-0.013289	0.999997
FBgn0020621	0.216305	0.999997
FBgn0020622	0.0140242	0.999997
FBgn0020626	-0.0160562	0.999997
FBgn0020633	0.0973012	0.999997
FBgn0020637	0.0850748	0.999997
FBgn0020638	-0.0300538	0.999997
FBgn0020647	-0.20756	0.999997
FBgn0020653	-0.25394	0.999997
FBgn0020655	-0.0492001	0.999997
FBgn0020660	0.474051	0.999997
FBgn0020762	-0.194274	0.999997
FBgn0020764	-0.355848	0.999997
FBgn0020767	-0.0703087	0.999997
FBgn0020887	-0.194342	0.999997
FBgn0020906	-0.0373166	0.999997
FBgn0020907	0.0711555	0.999997
FBgn0020908	-0.0602415	0.999997
FBgn0020909	-0.00439405	0.999997
FBgn0020910	-0.208097	0.999997
FBgn0020912	0.0969389	0.999997
FBgn0020930	-0.257423	0.999997
FBgn0021750	0.00250318	0.999997
FBgn0021760	0.34327	0.999997
FBgn0021761	-0.059642	0.999997
FBgn0021764	0.0843793	0.999997
FBgn0021765	-0.201775	0.999997
FBgn0021768	-0.167465	0.999997
FBgn0021776	0.352808	0.999997
FBgn0021795	-0.327435	0.999997
FBgn0021796	-0.159985	0.999997
FBgn0021800	0.178315	0.999997
FBgn0021814	-0.18862	0.999997
FBgn0021818	-0.164852	0.999997
FBgn0021825	0.183913	0.999997
FBgn0021847	-0.110899	0.999997
FBgn0021856	0.0772462	0.999997
FBgn0021872	0.206417	0.999997
FBgn0021874	0.27774	0.999997
FBgn0021875	-0.187085	0.999997
FBgn0021895	0.143939	0.999997
FBgn0021906	-0.0575152	0.999997
FBgn0021944	0.10789	0.999997
FBgn0021967	-0.129658	0.999997
FBgn0021979	0.18303	0.999997
FBgn0021995	0.22141	0.999997
FBgn0022023	-0.213364	0.999997
FBgn0022027	-0.425777	0.999997
FBgn0022029	0.0436123	0.999997
FBgn0022069	0.269551	0.999997
FBgn0022097	-0.314054	0.999997
FBgn0022153	-0.332156	0.999997
FBgn0022160	0.0922636	0.999997
FBgn0022213	-0.111898	0.999997
FBgn0022224	0.192191	0.999997
FBgn0022238	0.105144	0.999997
FBgn0022288	0.0875329	0.999997
FBgn0022338	-0.0833438	0.999997
FBgn0022343	-0.325505	0.999997
FBgn0022344	-0.328875	0.999997
FBgn0022349	0.190185	0.999997
FBgn0022355	0.0937577	0.999997
FBgn0022359	-0.158463	0.999997
FBgn0022361	-0.0447481	0.999997
FBgn0022382	-0.0460028	0.999997
FBgn0022699	0.0124538	0.999997
FBgn0022700	-0.012164	0.999997
FBgn0022702	-0.271157	0.999997
FBgn0022709	-0.147421	0.999997
FBgn0022710	0.078392	0.999997
FBgn0022724	-0.0678976	0.999997
FBgn0022764	0.0262419	0.999997
FBgn0022768	0.23869	0.999997
FBgn0022772	-0.180845	0.999997
FBgn0022774	-0.166169	0.999997
FBgn0022786	-0.345538	0.999997
FBgn0022787	0.0550326	0.999997
FBgn0022893	0.186383	0.999997
FBgn0022935	-0.319095	0.999997
FBgn0022936	-0.1272	0.999997
FBgn0022942	0.0886456	0.999997
FBgn0022943	-0.0977898	0.999997
FBgn0022959	0.138609	0.999997
FBgn0022960	0.328879	0.999997
FBgn0022981	0.00765583	0.999997
FBgn0022984	0.357453	0.999997
FBgn0022985	0.108902	0.999997
FBgn0022986	0.319867	0.999997
FBgn0022987	0.0908723	0.999997
FBgn0023000	0.270846	0.999997
FBgn0023001	0.289462	0.999997
FBgn0023076	0.0477446	0.999997
FBgn0023081	-0.181965	0.999997
FBgn0023083	-0.0184989	0.999997
FBgn0023094	-0.133196	0.999997
FBgn0023095	-0.102096	0.999997
FBgn0023097	0.0988528	0.999997
FBgn0023129	0.166778	0.999997
FBgn0023130	-0.156036	0.999997
FBgn0023143	-0.31275	0.999997
FBgn0023167	-0.0496225	0.999997
FBgn0023169	-0.194057	0.999997
FBgn0023170	0.453629	0.999997
FBgn0023171	-0.0289815	0.999997
FBgn0023172	0.118874	0.999997
FBgn0023174	-0.0683565	0.999997
FBgn0023175	-0.076796	0.999997
FBgn0023177	-0.047633	0.999997
FBgn0023180	0.180378	0.999997
FBgn0023181	-0.0485327	0.999997
FBgn0023197	0.00126297	0.999997
FBgn0023212	0.194708	0.999997
FBgn0023213	0.22179	0.999997
FBgn0023214	0.02209	0.999997
FBgn0023215	0.13376	0.999997
FBgn0023216	0.0937663	0.999997
FBgn0023388	0.0448341	0.999997
FBgn0023395	-0.0523155	0.999997
FBgn0023407	0.0626075	0.999997
FBgn0023441	0.143038	0.999997
FBgn0023458	-0.0991266	0.999997
FBgn0023477	-0.248998	0.999997
FBgn0023479	-0.0617429	0.999997
FBgn0023506	-0.187213	0.999997
FBgn0023507	-0.0175286	0.999997
FBgn0023508	-0.307477	0.999997
FBgn0023509	0.302701	0.999997
FBgn0023510	0.2056	0.999997
FBgn0023511	0.122913	0.999997
FBgn0023512	0.0592688	0.999997
FBgn0023513	-0.0646653	0.999997
FBgn0023514	-0.0197283	0.999997
FBgn0023515	-0.229304	0.999997
FBgn0023516	-0.266552	0.999997
FBgn0023517	-0.234635	0.999997
FBgn0023518	-0.0818221	0.999997
FBgn0023519	-0.143944	0.999997
FBgn0023520	0.0732709	0.999997
FBgn0023521	-0.162686	0.999997
FBgn0023522	0.138369	0.999997
FBgn0023525	0.108262	0.999997
FBgn0023526	0.125946	0.999997
FBgn0023527	0.0567456	0.999997
FBgn0023528	0.278171	0.999997
FBgn0023529	-0.020385	0.999997
FBgn0023530	-0.143304	0.999997
FBgn0023531	-0.183054	0.999997
FBgn0023535	-0.0593749	0.999997
FBgn0023536	-0.085031	0.999997
FBgn0023537	-0.272492	0.999997
FBgn0023540	-0.0367605	0.999997
FBgn0023541	-0.0462152	0.999997
FBgn0023542	0.0117492	0.999997
FBgn0023545	0.0554394	0.999997
FBgn0023549	-0.312846	0.999997
FBgn0024177	-0.110274	0.999997
FBgn0024179	-0.301743	0.999997
FBgn0024183	0.237849	0.999997
FBgn0024187	0.173994	0.999997
FBgn0024188	0.0978862	0.999997
FBgn0024191	0.0167868	0.999997
FBgn0024194	0.042323	0.999997
FBgn0024196	-0.00646531	0.999997
FBgn0024222	0.225524	0.999997
FBgn0024227	-0.0309108	0.999997
FBgn0024230	-0.106006	0.999997
FBgn0024234	0.446776	0.999997
FBgn0024236	0.00271087	0.999997
FBgn0024238	0.0472209	0.999997
FBgn0024244	0.370231	0.999997
FBgn0024245	0.378963	0.999997
FBgn0024248	0.325788	0.999997
FBgn0024250	0.465892	0.999997
FBgn0024273	-0.138648	0.999997
FBgn0024277	0.185861	0.999997
FBgn0024285	-0.173974	0.999997
FBgn0024289	-0.0633537	0.999997
FBgn0024291	0.065807	0.999997
FBgn0024293	0.001432	0.999997
FBgn0024314	-0.234361	0.999997
FBgn0024315	-0.0807011	0.999997
FBgn0024320	-0.100051	0.999997
FBgn0024321	0.0355554	0.999997
FBgn0024326	-0.117883	0.999997
FBgn0024329	0.00309308	0.999997
FBgn0024330	0.0743746	0.999997
FBgn0024332	-0.0745976	0.999997
FBgn0024352	-0.14584	0.999997
FBgn0024360	-0.235258	0.999997
FBgn0024361	-0.0058552	0.999997
FBgn0024362	-0.16949	0.999997
FBgn0024364	-0.259373	0.999997
FBgn0024365	-0.0966071	0.999997
FBgn0024371	-0.183414	0.999997
FBgn0024432	0.0284887	0.999997
FBgn0024491	0.0219674	0.999997
FBgn0024509	-0.249886	0.999997
FBgn0024510	-0.0268254	0.999997
FBgn0024542	-0.0113072	0.999997
FBgn0024555	0.375932	0.999997
FBgn0024556	-0.0821335	0.999997
FBgn0024558	-0.256566	0.999997
FBgn0024689	0.0430563	0.999997
FBgn0024698	-0.00780876	0.999997
FBgn0024728	0.0705769	0.999997
FBgn0024732	-0.252854	0.999997
FBgn0024733	-0.00913382	0.999997
FBgn0024734	0.253273	0.999997
FBgn0024754	0.211643	0.999997
FBgn0024806	0.079636	0.999997
FBgn0024807	0.368659	0.999997
FBgn0024811	0.236724	0.999997
FBgn0024814	0.138683	0.999997
FBgn0024833	-0.048768	0.999997
FBgn0024841	-0.27084	0.999997
FBgn0024846	-0.185917	0.999997
FBgn0024887	-0.0977724	0.999997
FBgn0024889	-0.0608075	0.999997
FBgn0024909	0.163232	0.999997
FBgn0024912	0.00934997	0.999997
FBgn0024920	-0.152975	0.999997
FBgn0024921	0.272716	0.999997
FBgn0024941	0.0835812	0.999997
FBgn0024945	-0.00630055	0.999997
FBgn0024947	-0.00348192	0.999997
FBgn0024956	-0.16571	0.999997
FBgn0024957	-0.24064	0.999997
FBgn0024958	-0.0586545	0.999997
FBgn0024963	0.0637534	0.999997
FBgn0024973	-0.131083	0.999997
FBgn0024975	-0.0756884	0.999997
FBgn0024980	0.124142	0.999997
FBgn0024983	-0.00125162	0.999997
FBgn0024984	-0.0146209	0.999997
FBgn0024985	-0.373089	0.999997
FBgn0024986	-0.0511523	0.999997
FBgn0024987	-0.0357933	0.999997
FBgn0024991	-0.394183	0.999997
FBgn0024992	-0.35868	0.999997
FBgn0024993	-0.144444	0.999997
FBgn0024994	-0.137286	0.999997
FBgn0024995	-0.0663679	0.999997
FBgn0024996	-0.167561	0.999997
FBgn0024997	-0.064164	0.999997
FBgn0024998	-0.331199	0.999997
FBgn0025109	-0.0473039	0.999997
FBgn0025111	-0.159407	0.999997
FBgn0025185	-0.239234	0.999997
FBgn0025186	-0.0987949	0.999997
FBgn0025286	-0.195825	0.999997
FBgn0025335	-0.123932	0.999997
FBgn0025336	-0.165603	0.999997
FBgn0025352	-0.264233	0.999997
FBgn0025360	0.0742815	0.999997
FBgn0025366	0.0129852	0.999997
FBgn0025373	0.210295	0.999997
FBgn0025381	-0.106595	0.999997
FBgn0025382	-0.0708292	0.999997
FBgn0025387	0.00893147	0.999997
FBgn0025388	0.0873076	0.999997
FBgn0025390	-0.203443	0.999997
FBgn0025394	0.0116385	0.999997
FBgn0025454	0.00651873	0.999997
FBgn0025455	0.345345	0.999997
FBgn0025456	0.12142	0.999997
FBgn0025457	0.115731	0.999997
FBgn0025463	-0.187294	0.999997
FBgn0025469	-0.225673	0.999997
FBgn0025519	0.141914	0.999997
FBgn0025525	0.163227	0.999997
FBgn0025549	-0.125993	0.999997
FBgn0025558	-0.165357	0.999997
FBgn0025571	-0.00854218	0.999997
FBgn0025574	-0.00387906	0.999997
FBgn0025582	0.151565	0.999997
FBgn0025583	-0.0585055	0.999997
FBgn0025592	0.0159277	0.999997
FBgn0025608	-0.166595	0.999997
FBgn0025615	-0.0239556	0.999997
FBgn0025620	-0.107616	0.999997
FBgn0025621	-0.336559	0.999997
FBgn0025624	-0.0797376	0.999997
FBgn0025626	-0.171141	0.999997
FBgn0025628	-0.102493	0.999997
FBgn0025629	-0.00464557	0.999997
FBgn0025630	0.0326216	0.999997
FBgn0025631	-0.131188	0.999997
FBgn0025632	-0.00808748	0.999997
FBgn0025633	0.0258374	0.999997
FBgn0025634	-0.33601	0.999997
FBgn0025635	0.137434	0.999997
FBgn0025637	0.0737755	0.999997
FBgn0025638	0.0181258	0.999997
FBgn0025639	-0.216045	0.999997
FBgn0025640	-0.252077	0.999997
FBgn0025641	-0.11102	0.999997
FBgn0025674	-0.0495069	0.999997
FBgn0025676	0.15431	0.999997
FBgn0025678	0.148386	0.999997
FBgn0025680	0.255174	0.999997
FBgn0025681	0.110727	0.999997
FBgn0025682	-0.0161027	0.999997
FBgn0025683	-0.044724	0.999997
FBgn0025684	0.0455692	0.999997
FBgn0025687	-0.245068	0.999997
FBgn0025692	-0.053895	0.999997
FBgn0025693	-0.0766483	0.999997
FBgn0025697	-0.0376117	0.999997
FBgn0025700	-0.149047	0.999997
FBgn0025702	-0.0469152	0.999997
FBgn0025709	-0.0193616	0.999997
FBgn0025716	0.0520073	0.999997
FBgn0025720	-0.0586558	0.999997
FBgn0025724	-0.00660791	0.999997
FBgn0025725	-0.15461	0.999997
FBgn0025726	0.346076	0.999997
FBgn0025740	0.328467	0.999997
FBgn0025741	0.342199	0.999997
FBgn0025742	-0.328801	0.999997
FBgn0025743	0.266834	0.999997
FBgn0025776	0.187585	0.999997
FBgn0025777	-0.0340148	0.999997
FBgn0025781	-0.0147653	0.999997
FBgn0025790	-0.130339	0.999997
FBgn0025800	-0.304138	0.999997
FBgn0025802	0.188315	0.999997
FBgn0025807	-0.319899	0.999997
FBgn0025808	-0.0195483	0.999997
FBgn0025809	0.11991	0.999997
FBgn0025814	-0.186741	0.999997
FBgn0025815	-0.107146	0.999997
FBgn0025820	-0.136238	0.999997
FBgn0025830	-0.0359599	0.999997
FBgn0025832	-0.394394	0.999997
FBgn0025836	-0.135611	0.999997
FBgn0025837	0.197239	0.999997
FBgn0025839	-0.111155	0.999997
FBgn0025864	0.104836	0.999997
FBgn0025865	0.146862	0.999997
FBgn0025866	0.174263	0.999997
FBgn0025874	-0.368459	0.999997
FBgn0025879	-0.00296058	0.999997
FBgn0025885	-0.293637	0.999997
FBgn0025936	0.124226	0.999997
FBgn0026015	0.168843	0.999997
FBgn0026056	0.01385	0.999997
FBgn0026059	0.00884313	0.999997
FBgn0026061	0.119763	0.999997
FBgn0026076	-0.12291	0.999997
FBgn0026077	0.0718379	0.999997
FBgn0026079	-0.0317099	0.999997
FBgn0026080	-0.0537069	0.999997
FBgn0026083	-0.0911463	0.999997
FBgn0026084	0.29349	0.999997
FBgn0026085	-0.0752344	0.999997
FBgn0026086	0.167903	0.999997
FBgn0026088	-0.190963	0.999997
FBgn0026089	-0.0249308	0.999997
FBgn0026090	-0.204701	0.999997
FBgn0026143	-0.249123	0.999997
FBgn0026144	0.0598514	0.999997
FBgn0026147	-0.136464	0.999997
FBgn0026148	-0.187669	0.999997
FBgn0026149	0.014978	0.999997
FBgn0026150	0.3791	0.999997
FBgn0026179	0.363094	0.999997
FBgn0026181	-0.0455099	0.999997
FBgn0026189	0.214555	0.999997
FBgn0026192	0.0454828	0.999997
FBgn0026196	-0.047042	0.999997
FBgn0026197	-0.288828	0.999997
FBgn0026199	0.329148	0.999997
FBgn0026206	0.135314	0.999997
FBgn0026207	0.0245845	0.999997
FBgn0026238	0.191494	0.999997
FBgn0026239	-0.0755413	0.999997
FBgn0026250	0.191934	0.999997
FBgn0026252	0.090637	0.999997
FBgn0026257	0.219958	0.999997
FBgn0026259	0.0871768	0.999997
FBgn0026261	-0.0931006	0.999997
FBgn0026262	0.315283	0.999997
FBgn0026263	-0.349381	0.999997
FBgn0026309	-0.081778	0.999997
FBgn0026313	-0.113137	0.999997
FBgn0026314	-0.0856478	0.999997
FBgn0026315	0.00760607	0.999997
FBgn0026316	-0.185796	0.999997
FBgn0026317	0.135994	0.999997
FBgn0026320	0.270081	0.999997
FBgn0026323	-0.134382	0.999997
FBgn0026324	0.0760848	0.999997
FBgn0026326	-0.0621258	0.999997
FBgn0026369	0.161172	0.999997
FBgn0026370	0.000890485	0.999997
FBgn0026371	0.147923	0.999997
FBgn0026372	-0.170982	0.999997
FBgn0026373	-0.0621607	0.999997
FBgn0026374	-2.12e-05	0.999997
FBgn0026375	-0.0187496	0.999997
FBgn0026376	0.239791	0.999997
FBgn0026378	0.0323032	0.999997
FBgn0026379	0.147704	0.999997
FBgn0026380	-0.0595151	0.999997
FBgn0026393	0.144944	0.999997
FBgn0026400	-0.0768895	0.999997
FBgn0026401	0.493943	0.999997
FBgn0026402	-0.108121	0.999997
FBgn0026404	0.0970625	0.999997
FBgn0026409	0.168988	0.999997
FBgn0026411	0.306496	0.999997
FBgn0026415	-0.0785285	0.999997
FBgn0026417	0.0986159	0.999997
FBgn0026418	-0.0427785	0.999997
FBgn0026427	0.251422	0.999997
FBgn0026428	-0.264981	0.999997
FBgn0026430	-0.483523	0.999997
FBgn0026431	0.0184753	0.999997
FBgn0026432	0.108908	0.999997
FBgn0026438	-0.201974	0.999997
FBgn0026439	0.0302158	0.999997
FBgn0026441	-0.0606896	0.999997
FBgn0026479	-0.297352	0.999997
FBgn0026533	0.321514	0.999997
FBgn0026562	-0.0703707	0.999997
FBgn0026563	-0.0265944	0.999997
FBgn0026565	-0.0324593	0.999997
FBgn0026566	-0.018674	0.999997
FBgn0026570	-0.123882	0.999997
FBgn0026573	0.25992	0.999997
FBgn0026575	0.0480048	0.999997
FBgn0026576	-0.164174	0.999997
FBgn0026577	0.535831	0.999997
FBgn0026582	0.0268482	0.999997
FBgn0026592	-0.141	0.999997
FBgn0026593	0.0143676	0.999997
FBgn0026597	-0.0166682	0.999997
FBgn0026598	-0.00816511	0.999997
FBgn0026602	0.0561925	0.999997
FBgn0026616	0.268678	0.999997
FBgn0026619	-0.189223	0.999997
FBgn0026620	0.219466	0.999997
FBgn0026630	-0.0270799	0.999997
FBgn0026634	-0.0254413	0.999997
FBgn0026666	-0.158632	0.999997
FBgn0026679	-0.0843627	0.999997
FBgn0026702	-0.0987388	0.999997
FBgn0026713	0.0162772	0.999997
FBgn0026718	0.000686996	0.999997
FBgn0026721	0.0775717	0.999997
FBgn0026722	0.0533068	0.999997
FBgn0026737	0.0801804	0.999997
FBgn0026738	-0.14361	0.999997
[truncated: 15,423 more rows]

## Sheet: E. All DE logCPM
Gene	dlWT 1	dlWT 2	dlSCR 1	dlSCR 2	dlWT/Df 1	dlWT/Df 2	dlSCR/Df 1	dlSCR/Df 2
FBgn0051813	6.36456	5.9872	2.8738	2.87125	0.733116	2.9678	-0.457906	3.89561
FBgn0030186	6.74878	6.04721	3.44482	2.87125	-0.472554	3.85938	0.957348	2.43875
FBgn0027527	5.66603	5.51724	2.11046	2.0655	0.252726	1.81019	-0.457906	2.32491
FBgn0039434	6.41364	4.07863	-1.04304	-0.377151	-0.472554	3.28775	2.48099	2.82113
FBgn0037414	4.67975	4.76467	0.385882	0.932493	-1.04304	1.97766	-1.04304	2.9419
FBgn0033810	5.87162	5.77127	3.58307	3.56942	5.46046	5.49702	4.79036	4.2938
FBgn0020638	5.03949	3.92425	-0.397661	-1.04304	-1.04304	2.44608	1.76476	0.598099
FBgn0033721	5.36398	5.41328	2.97774	2.48776	-0.064809	2.9678	-0.0427821	3.15677
FBgn0035208	6.07946	5.55531	1.91484	3.49852	0.252726	0.179875	1.12729	3.77073
FBgn0052364	0.336819	0.287022	4.97375	3.98701	2.37657	2.32702	4.3325	4.16739
FBgn0039444	5.27985	3.75136	0.0466633	0.699478	-0.472554	1.6207	-0.457906	1.34604
FBgn0267795	7.30935	6.9188	5.73676	5.60264	6.17077	6.41091	5.58683	6.09075
FBgn0053977	7.00025	7.03653	5.81602	5.30315	6.41318	6.35495	5.58683	5.38639
FBgn0036465	-1.04304	-1.04304	3.87991	4.06269	-0.472554	-0.512245	1.76476	1.34604
FBgn0033275	4.67975	4.25555	1.41985	1.46599	-0.472554	1.1453	-0.457906	2.38295
FBgn0013705	6.72423	7.3236	5.66851	5.40359	6.2398	6.74287	5.79036	6.63843
FBgn0013704	6.72776	7.19927	5.62915	5.48836	6.91608	6.87342	5.79668	6.85128
FBgn0263847	4.04937	4.58493	1.41985	0.699478	3.40692	2.75367	2.48099	2.9419
FBgn0035735	4.60488	3.46175	0.0466633	0.0767101	-0.472554	0.431477	0.279198	0.944924
FBgn0037424	4.42507	4.44592	2.01596	1.30911	-1.04304	2.05463	-1.04304	1.65955
FBgn0035077	4.65027	4.21806	1.80609	1.73632	-0.472554	2.60806	-0.457906	1.09138
FBgn0033740	3.83026	2.49288	5.45099	5.53339	4.94719	5.61608	5.68539	5.15612
FBgn0036872	5.53504	6.05786	3.76839	4.41041	5.96871	5.9691	5.97428	4.4513
FBgn0036545	6.19116	5.98161	4.97375	4.26847	5.69486	5.79497	5.2336	4.97927
FBgn0034204	4.77844	2.96965	1.08951	0.0767101	-1.04304	3.6017	2.91164	1.34604
FBgn0028855	4.47638	4.65673	2.81888	2.0655	-1.04304	2.50212	-0.0427821	1.91695
FBgn0004777	4.1789	2.82754	0.0466633	-0.377151	-0.064809	1.97766	0.542267	0.598099
FBgn0040279	3.72106	3.52451	-0.397661	0.699478	-1.04304	0.179875	-1.04304	0.387403
FBgn0051626	3.54001	3.21771	-0.397661	-0.377151	-0.472554	1.6207	0.279198	1.65955
FBgn0086027	5.75181	5.69829	3.79709	4.55718	6.21715	6.05121	4.71236	4.67687
FBgn0010431	6.83974	6.09452	7.52723	7.94334	6.62066	7.11942	7.53112	7.27569
FBgn0040842	3.85632	2.6699	-1.04304	-1.04304	-0.472554	1.6207	0.279198	-0.53327
FBgn0041717	5.3457	5.32788	2.36167	3.98701	5.17106	5.32127	3.91166	4.32375
FBgn0052214	3.63337	3.55489	0.890819	-0.377151	3.95883	4.11435	3.57217	2.9419
FBgn0058469	13.5622	14.3062	12.7122	13.1393	13.0787	13.4658	13.7235	12.874
FBgn0035547	3.93177	3.77737	1.41985	1.13305	-0.472554	1.1453	-1.04304	0.598099
FBgn0035541	7.56771	7.63757	6.7376	6.79352	7.17062	7.14825	6.65792	6.44083
FBgn0083987	5.97036	5.59241	3.9326	4.72185	5.33987	5.2657	4.27939	4.86172
FBgn0001085	4.792	5.00371	5.99389	6.44328	6.16605	6.25657	6.4128	7.46057
FBgn0015805	6.20643	5.97601	6.9915	7.41779	6.82317	7.19149	7.07122	7.28333
FBgn0036199	4.44238	4.23693	5.65289	5.80717	5.87345	5.79497	6.31062	5.70922
FBgn0038017	4.38983	3.49347	1.91484	0.699478	-0.064809	2.05463	0.279198	1.34604
FBgn0052243	5.31785	5.26494	6.25923	6.79721	5.87345	6.06057	6.72566	6.05549
FBgn0037617	5.18022	5.48604	3.9065	4.0379	5.55739	5.52434	5.08675	4.79915
FBgn0262813	1.62177	1.87559	2.97774	5.36425	-1.04304	0.997181	4.60132	6.3528
FBgn0010228	4.72287	4.80315	6.06641	5.9667	4.18103	5.42638	5.61568	7.26416
FBgn0031097	3.69242	3.55489	1.26412	0.699478	-0.472554	0.645647	-0.457906	1.09138
FBgn0000228	6.61783	6.57034	7.41368	7.77357	6.30137	6.75157	7.37322	8.4944
FBgn0003274	12.6334	12.8697	11.8562	12.1557	12.3019	12.1179	11.9431	12.1778
FBgn0003277	6.75918	6.57405	7.53151	7.7278	7.32049	8.18375	8.49081	8.20871
FBgn0029114	4.60488	4.61408	5.87105	5.8995	4.68209	5.24121	5.71902	7.05915
FBgn0035621	3.72106	4.03618	1.41985	1.73632	-0.472554	-0.125072	-0.457906	2.98001
FBgn0036594	3.69242	2.49288	-0.397661	-1.04304	-1.04304	0.179875	-0.457906	0.140587
FBgn0027499	6.00571	5.80326	7.03431	6.8192	6.54994	6.78301	6.81856	7.35758
FBgn0027843	4.85797	5.04711	6.14107	6.16287	5.65497	5.42638	6.56481	5.59722
FBgn0037913	9.81001	9.7237	9.18963	9.09019	9.35243	8.88351	8.62725	8.99948
FBgn0062928	7.02631	7.34332	6.19058	6.40502	6.5317	6.63108	6.14235	5.9101
FBgn0287234	4.3537	3.92425	2.50772	1.60748	0.924183	2.1277	1.12729	2.1353
FBgn0011761	12.3228	12.0043	11.4962	11.5677	11.8662	12.0211	11.5464	11.0602
FBgn0039286	1.62177	2.05637	4.17053	3.90714	0.512824	3.72455	4.29732	5.78652
FBgn0040798	3.74915	2.13892	-1.04304	-1.04304	-1.04304	1.27962	0.764684	1.09138
FBgn0050457	3.25672	2.72438	-0.397661	-1.04304	-1.04304	1.6207	1.2793	0.598099
FBgn0265082	3.33292	3.13967	4.78608	4.89746	3.12495	2.79911	3.1669	3.83452
FBgn0037430	3.93177	2.49288	0.385882	0.0767101	-1.04304	1.27962	-1.04304	0.387403
FBgn0001256	3.72106	3.39613	-1.04304	1.30911	-1.04304	-0.512245	-1.04304	1.65955
FBgn0004389	5.59043	5.62857	6.21737	7.37884	3.23724	3.00706	6.03962	7.50535
FBgn0033021	6.26596	5.6708	6.79919	7.35647	6.2398	7.19999	7.29063	7.52482
FBgn0033942	4.02661	3.58465	2.01596	1.30911	1.91865	1.51572	1.41681	1.65955
FBgn0035856	3.72106	1.96881	-1.04304	-1.04304	-1.04304	1.27962	1.12729	0.598099
FBgn0263979	7.03489	6.02567	7.42061	8.11758	6.97395	8.19229	8.37849	8.01812
FBgn0266582	8.48988	8.73866	8.02407	7.87851	8.2158	7.9227	7.74864	7.67757
FBgn0031759	7.09357	6.80648	7.74172	7.89585	7.52054	7.80232	7.58865	8.60371
FBgn0036592	3.29532	2.55433	-0.397661	-0.377151	-0.472554	0.832095	-1.04304	0.387403
FBgn0004183	4.54206	4.15995	2.64034	2.814	3.95883	4.05939	2.20535	2.86252
FBgn0039441	4.1789	1.66886	0.0466633	-1.04304	-1.04304	1.89636	0.764684	1.75055
FBgn0014417	5.00497	4.58493	5.7877	6.16287	5.95235	6.12891	6.2794	5.8289
FBgn0050085	4.69427	3.80291	5.36735	5.98627	5.23558	5.9691	6.26581	6.16293
FBgn0035513	3.44018	2.87648	0.66033	0.0767101	-0.472554	1.1453	0.279198	1.45829
FBgn0284248	7.77314	7.17257	8.149	8.7897	7.40105	8.53551	8.81079	8.61586
FBgn0083973	6.33707	7.64818	7.03431	7.97959	3.52962	3.74792	7.12489	8.31874
FBgn0085243	6.08498	7.34114	6.60593	7.53314	3.43859	4.13222	6.92037	8.18443
FBgn0000227	5.98224	6.8893	6.30491	7.1551	3.23724	3.52262	6.35835	7.50862
FBgn0038566	5.59043	6.3058	6.17427	7.12305	2.1657	3.22253	6.18148	7.53286
FBgn0035569	5.86522	6.13531	6.03061	7.59604	2.77414	3.11882	6.04494	7.89012
FBgn0042199	4.80544	5.76479	5.08266	5.69273	2.08796	1.81019	5.06599	6.00094
FBgn0003683	5.28944	6.35843	5.89779	6.28376	2.37657	3.52262	5.90584	7.32094
FBgn0031621	5.15945	6.03109	5.8369	6.73304	2.67127	2.84317	5.33251	6.89681
FBgn0031718	5.27985	6.37129	5.49545	6.40016	2.23947	3.35015	5.60133	6.71951
FBgn0013755	5.73786	6.50569	5.26834	5.99273	1.2439	2.05463	4.77765	6.16707
FBgn0004143	5.28944	6.31471	5.79483	6.47594	1.72679	2.26359	4.87633	6.08202
FBgn0004053	3.29532	3.75136	3.73911	4.85552	0.252726	0.997181	4.02355	5.55996
FBgn0035572	3.83026	4.46205	3.73911	5.21745	-0.064809	0.645647	3.76481	5.29864
FBgn0029931	3.40531	4.37957	4.1923	5.07851	0.924183	1.71855	4.14729	5.56624
FBgn0037797	2.8003	4.79043	3.87991	4.42959	1.82591	3.22253	5.55739	5.34318
FBgn0030807	4.37188	5.84074	4.71266	5.68477	2.37657	2.32702	4.40041	6.19163
FBgn0043854	6.89735	7.39462	7.54215	8.1425	6.07831	6.59932	7.64573	8.67731
FBgn0013686	13.522	12.8693	13.7144	15.2543	13.2942	14.5515	15.5759	16.2013
FBgn0001320	3.72106	4.17958	4.55356	5.25019	1.82591	2.60806	4.14729	6.09943
FBgn0263971	0.336819	0.550957	0.66033	2.33336	-0.064809	0.179875	3.00184	5.29108
FBgn0003900	3.13429	4.59958	4.65111	4.93822	0.733116	2.60806	4.51206	5.48906
FBgn0004635	3.57181	3.92425	4.03253	4.42959	2.87016	3.15422	4.48103	6.53982
FBgn0005590	4.44238	5.09958	4.14843	4.65822	1.09288	1.27962	3.27938	5.18903
FBgn0036810	3.00049	4.41313	3.25099	4.7678	1.09288	0.645647	3.1669	4.67687
FBgn0024150	1.9468	2.61327	2.8738	3.38518	0.733116	0.997181	3.27938	4.42392
FBgn0032489	3.04648	4.11986	4.03253	4.69039	0.924183	2.88592	4.26125	5.47578
FBgn0001150	2.95299	4.32772	4.65111	4.75265	1.2439	2.65824	3.81544	5.58491
FBgn0263707	2.2119	3.36217	3.12083	4.37126	0.733116	1.1453	3.00184	4.85148
FBgn0031719	3.33292	4.44592	3.12083	4.59165	0.252726	-0.125072	2.41686	4.84117
FBgn0003448	0.336819	-0.453554	1.56041	3.26217	-0.064809	1.97766	3.76481	4.79915
FBgn0001077	2.56778	3.64239	4.08001	4.11102	0.252726	1.89636	3.315	5.13938
FBgn0037992	3.60292	3.94734	3.12083	4.15779	0.512824	0.645647	2.81542	4.47818
FBgn0043791	2.62952	3.17922	3.16553	3.637	-0.064809	1.40249	3.24285	4.53048
FBgn0004102	1.62177	2.92382	2.8738	3.17391	1.09288	2.05463	3.04491	5.52172
FBgn0003720	2.12883	3.61381	3.33167	4.0379	-0.064809	1.27962	2.95745	4.59329
FBgn0038385	0.833021	2.72438	1.91484	2.92631	0.252726	0.645647	2.86433	4.18381
FBgn0003002	1.49482	2.217	3.12083	2.33336	-0.064809	2.05463	3.24285	5.26044
FBgn0036791	2.8003	3.42931	2.76179	3.07991	1.50546	1.40249	2.91164	5.0704
FBgn0085295	3.47423	4.09939	4.10318	5.10262	0.252726	1.81019	3.315	4.72254
FBgn0020300	3.09105	3.29175	3.02703	3.66964	1.09288	1.81019	3.12737	4.89202
FBgn0003731	3.04648	2.87648	2.70234	3.12768	1.50546	2.26359	3.27938	5.22121
FBgn0036503	2.85301	4.01448	4.1923	4.48566	2.56051	3.57582	4.52732	5.52817
FBgn0001149	10.6662	10.2893	10.1617	9.52027	10.5002	10.0904	9.30177	9.04681
FBgn0003270	4.15811	5.08924	3.48064	4.89746	1.2439	1.51572	3.08673	4.64164
FBgn0026361	4.83194	4.92447	5.38636	6.02462	4.68209	5.45505	6.15715	6.8016
FBgn0003300	1.49482	2.49288	3.02703	2.55918	-0.064809	0.997181	2.41686	4.69989
FBgn0003719	2.43577	3.09901	2.64034	3.21871	0.252726	0.997181	2.7648	4.26322
FBgn0004956	1.9468	3.17922	2.8738	3.34533	0.252726	0.645647	2.65788	4.13398
FBgn0263380	3.21705	3.99245	4.00819	4.15779	0.924183	2.92744	3.79035	5.44886
FBgn0263256	3.47423	4.05756	3.95824	3.73278	2.77414	2.92744	3.93474	5.42143
FBgn0032377	2.36494	3.36217	3.02703	3.60361	1.50546	2.19724	3.38372	4.73374
FBgn0266756	4.02661	4.52479	5.04726	4.95155	4.19963	4.21838	4.84011	6.53982
FBgn0001174	7.06313	8.07244	7.6891	8.78413	4.1431	5.02873	7.76322	9.41996
FBgn0259745	8.07861	8.55638	8.68164	8.77759	8.08809	8.61231	8.81235	10.2977
FBgn0000606	1.62177	2.82754	3.2089	2.97935	-0.472554	1.1453	2.7648	4.08236
FBgn0261434	2.62952	2.49288	3.02703	3.60361	0.252726	2.05463	3.00184	4.75587
FBgn0026160	5.62872	5.92458	6.51384	5.76248	5.38932	5.34445	5.82784	7.35939
FBgn0037504	1.9468	2.13892	3.37038	4.57452	2.56051	3.74792	4.58682	5.29108
FBgn0004054	1.9468	1.77592	1.41985	2.69221	-1.04304	-0.512245	1.95741	3.6099
FBgn0033652	2.04068	1.55321	2.50772	2.41262	1.09288	1.81019	3.00184	4.42392
FBgn0010109	2.2119	2.6699	2.70234	3.49852	0.733116	1.51572	2.71233	4.36753
FBgn0262531	2.56778	3.29175	3.79709	3.73278	1.91865	1.89636	3.24285	4.55593
FBgn0035570	2.43577	2.96965	2.36167	3.42396	-1.04304	0.997181	2.60129	4.04689
FBgn0044028	1.35562	1.77592	2.97774	2.62723	0.252726	1.6207	1.95741	5.03464
FBgn0015949	6.44832	6.6881	6.95376	7.30545	6.22171	6.2848	6.74211	7.82488
FBgn0000180	2.56778	3.75136	3.85283	4.33102	1.50546	3.6521	4.08675	5.68636
FBgn0266418	2.85301	3.52451	3.25099	2.92631	2.61695	2.55606	3.34977	5.23703
FBgn0003567	5.28944	4.79043	5.62915	6.15136	4.79649	5.81723	6.28839	6.86407
FBgn0046776	6.12304	5.91875	5.58045	5.65248	3.64269	3.00706	2.95745	3.81357
FBgn0031393	5.24082	6.33235	5.64502	6.17429	1.82591	2.84317	4.82783	6.86662
FBgn0010602	7.79856	7.45023	7.64834	7.95166	8.92994	9.35269	8.91965	8.43905
FBgn0035287	0.00539514	1.66886	1.26412	0.42144	4.82072	4.74504	4.75188	4.82031
FBgn0033381	1.02902	1.42747	1.91484	1.30911	4.12375	4.87805	4.3325	4.35308
FBgn0004052	4.75092	5.82836	6.11281	7.0287	1.82591	3.15422	6.1324	7.77968
FBgn0264495	7.45073	7.31696	8.03013	7.67854	8.33312	8.45351	7.97289	7.99388
FBgn0031288	-1.04304	-1.04304	0.385882	-1.04304	3.61524	3.43896	4.00186	3.77073
FBgn0034788	-1.04304	-1.04304	-1.04304	-1.04304	3.20078	3.85938	3.68538	2.06613
FBgn0004169	6.27081	6.16516	5.8369	4.62532	5.04301	4.70977	4.68539	4.92169
FBgn0002773	7.3784	7.30361	7.00386	6.18562	6.51695	5.89254	6.17179	6.12941
FBgn0039214	6.27081	6.14032	6.55222	6.40016	7.13965	7.25402	6.92902	6.92395
FBgn0020306	6.46535	6.40504	7.08174	7.06902	7.24415	7.62755	7.53868	7.60169
FBgn0011768	8.6446	8.40926	7.62452	8.51562	7.84687	7.52984	7.62636	7.66154
FBgn0285991	8.19675	8.50672	7.77996	7.96979	7.49629	7.50091	7.2336	6.38156
FBgn0040813	8.07999	8.10104	8.14203	7.21989	7.40105	6.63422	7.11735	7.26029
FBgn0003415	6.68115	6.53647	7.1445	6.97095	7.41902	7.68617	7.57035	7.47064
FBgn0259209	6.95576	6.85002	6.49644	5.77002	6.09331	5.19095	5.40868	5.74286
FBgn0026575	7.40953	7.57594	7.90388	7.88547	8.26189	8.50241	8.39106	8.30942
FBgn0052625	6.55955	6.38827	6.31982	6.58262	5.38932	5.47619	5.68539	5.32849
FBgn0031820	5.75181	5.53259	5.98768	6.48971	6.6344	6.73412	6.44933	6.07763
FBgn0020415	4.44238	4.31001	4.46691	4.11102	5.6617	5.65985	5.73226	4.95077
FBgn0003444	5.18022	4.94756	5.67625	5.61107	6.03235	6.3358	6.39627	6.23955
FBgn0028953	7.80191	7.79542	8.07915	7.83601	8.48206	8.66772	8.17786	8.89302
FBgn0086908	6.27564	6.25118	6.56896	6.44799	7.04253	7.32759	6.98262	6.17119
FBgn0010423	4.52592	4.29208	3.48064	2.55918	2.91587	1.97766	2.5424	3.18967
FBgn0036352	2.74559	3.01407	0.385882	1.46599	-1.04304	-1.04304	-0.0427821	1.91695
FBgn0050413	3.33292	2.87648	0.66033	0.699478	-0.472554	0.179875	0.279198	0.781909
FBgn0010926	6.32779	6.37129	6.55222	6.6165	7.19168	7.27025	7.35622	6.88932
FBgn0029681	3.09105	2.61327	0.0466633	-1.04304	-1.04304	-1.04304	-0.0427821	0.387403
FBgn0000100	10.0473	10.2008	9.86911	9.957	9.582	9.20699	9.37691	10.4493
FBgn0052581	1.02902	-1.04304	-1.04304	0.699478	3.00317	3.92235	4.08675	3.6099
FBgn0030373	5.05082	4.80315	4.33613	5.11452	3.52962	3.46739	3.8882	4.13398
FBgn0028408	7.65935	7.84544	7.69483	7.88721	8.4318	8.67536	8.49954	8.79154
FBgn0025641	5.60587	5.37972	6.40618	6.21908	6.42509	6.54367	6.48495	5.95384
FBgn0025382	5.03949	4.77761	3.98343	4.44853	3.40692	3.62712	3.24285	3.31422
FBgn0022764	7.3784	7.24657	7.4298	7.63375	7.94246	8.20712	8.14977	7.87756
FBgn0262104	3.36957	3.17922	1.56041	0.42144	-0.064809	0.997181	1.41681	1.09138
FBgn0264695	5.98814	5.73855	5.59687	4.46721	4.92501	4.73338	4.85229	4.71126
FBgn0015625	8.11413	8.3531	8.77837	8.65764	8.87531	9.10267	9.05617	8.35907
FBgn0261710	6.86242	6.90707	7.01306	7.26598	7.54983	7.81066	7.98538	7.7702
FBgn0266101	6.36909	5.94193	6.94737	7.1551	6.85285	7.29624	7.29955	8.21671
FBgn0086558	9.20002	9.03657	9.20511	8.98794	9.80148	9.73092	9.51924	9.08338
FBgn0031971	6.43541	6.12014	6.32967	6.56971	7.05791	7.18509	7.02357	6.12517
FBgn0033799	4.92105	4.58493	4.65111	4.39097	3.37455	3.35015	3.1669	3.25329
FBgn0014469	4.49308	4.64265	4.94839	3.17391	5.72084	5.65368	5.66483	5.12244
FBgn0013685	4.65027	4.46205	4.6353	4.62532	5.07358	5.49702	6.31942	5.90019
